# Supplementary material
Source: publisher site journal article supplement (https://www.dovepress.com/article/482767)
Supplement: Supplementary file 1 [file get_supplementary_file.php]

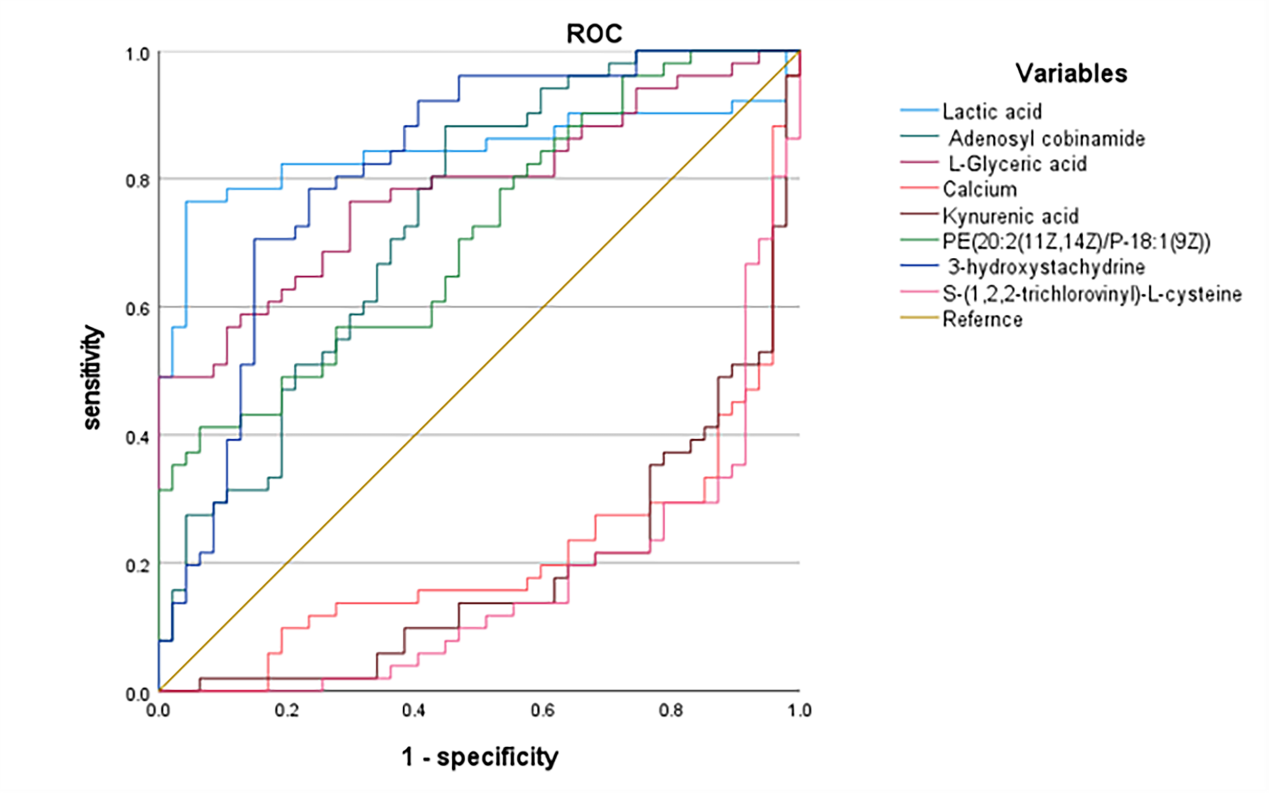


**Figure S1**: ROC curves of the 8 metabolites between healthy group and GC group. ROC, receiver operating characteristic. GC, gastric cancer.

| **Table S1: the student t test results of saliva metabolites between healthy and GC group** | | | |
| --- | --- | --- | --- |
| Positive mode |  | Negative model |  |
| Karyoplasmic ratio | P value | Karyoplasmic ratio | P value |
| M1057T453_2 | 3.32E-08 | M130T201 | 1.71E-08 |
| M1316T451_1 | 3.32E-08 | M840T386 | 1.71E-08 |
| M1155T448_1 | 3.32E-08 | M248T774 | 6.38E-08 |
| M876T455 | 3.32E-08 | M130T225 | 1.27E-07 |
| M981T451_1 | 4.61E-08 | M207T105 | 1.27E-07 |
| M970T451_1 | 4.65E-08 | M841T386 | 1.47E-07 |
| M867T455 | 4.65E-08 | M207T126 | 2.19E-07 |
| M992T452_1 | 4.65E-08 | M200T98 | 2.82E-07 |
| M1035T453 | 4.65E-08 | M176T45 | 3.16E-07 |
| M948T450 | 4.65E-08 | M181T246 | 4.20E-06 |
| M574T452 | 4.65E-08 | M383T247 | 4.93E-06 |
| M1069T454_1 | 4.65E-08 | M180T246 | 5.04E-06 |
| M1025T453_2 | 4.65E-08 | M179T74 | 5.16E-06 |
| M893T449_1 | 4.65E-08 | M166T103 | 5.29E-06 |
| M948T451 | 4.65E-08 | M796T387 | 5.33E-06 |
| M1046T453 | 4.74E-08 | M209T105 | 6.13E-06 |
| M1058T454_1 | 4.74E-08 | M818T436 | 1.06E-05 |
| M860T448_2 | 4.74E-08 | M128T156 | 1.48E-05 |
| M1080T454_1 | 4.74E-08 | M767T360 | 2.37E-05 |
| M1199T449_2 | 4.74E-08 | M166T177 | 2.58E-05 |
| M1025T453_1 | 4.74E-08 | M201T71 | 3.96E-05 |
| M1002T452_2 | 4.74E-08 | M823T387 | 4.11E-05 |
| M892T449 | 4.74E-08 | M793T387 | 4.11E-05 |
| M1037T446_1 | 4.74E-08 | M230T102 | 5.70E-05 |
| M606T451_1 | 4.74E-08 | M768T360 | 6.70E-05 |
| M894T455_1 | 4.74E-08 | M678T349 | 7.12E-05 |
| M581T452_2 | 4.74E-08 | M286T237 | 7.12E-05 |
| M992T452_2 | 4.74E-08 | M618T365 | 9.80E-05 |
| M850T454_1 | 4.74E-08 | M390T338 | 0.00011529 |
| M885T455_1 | 4.74E-08 | M504T246 | 0.00011529 |
| M797T452_1 | 4.74E-08 | M303T140 | 0.0001345 |
| M824T453_1 | 4.74E-08 | M436T74 | 0.00013739 |
| M859T454 | 4.74E-08 | M919T59 | 0.00014268 |
| M1003T452_1 | 4.74E-08 | M839T387 | 0.00015676 |
| M1013T453_2 | 4.74E-08 | M821T58 | 0.00015676 |
| M1036T454 | 4.74E-08 | M127T82 | 0.00016581 |
| M1079T454 | 4.83E-08 | M127T317 | 0.00021503 |
| M1302T451 | 4.83E-08 | M249T176 | 0.00021616 |
| M1375T453 | 4.83E-08 | M587T60 | 0.00021616 |
| M1228T450_2 | 4.83E-08 | M211T246 | 0.00021616 |
| M904T449_1 | 4.99E-08 | M97T761 | 0.00021616 |
| M991T452_2 | 4.99E-08 | M584T318 | 0.00022322 |
| M1287T451_1 | 5.46E-08 | M489T60 | 0.00022697 |
| M1301T452 | 5.46E-08 | M248T738 | 0.00023085 |
| M1184T449_1 | 5.46E-08 | M228T120 | 0.00024007 |
| M1199T449_1 | 6.39E-08 | M150T524 | 0.00034679 |
| M1008T445_1 | 6.39E-08 | M62T75 | 0.00035976 |
| M826T447_1 | 6.39E-08 | M744T355 | 0.00037185 |
| M806T452 | 6.39E-08 | M434T176 | 0.00037185 |
| M903T455 | 6.47E-08 | M1211T348 | 0.00042585 |
| M1110T447_2 | 6.52E-08 | M227T83 | 0.00043592 |
| M850T454_2 | 6.90E-08 | M301T261 | 0.00043592 |
| M881T449 | 7.23E-08 | M315T594 | 0.00052325 |
| M832T453 | 7.85E-08 | M723T59 | 0.00054134 |
| M860T448_1 | 8.16E-08 | M165T177 | 0.00054134 |
| M911T456 | 8.16E-08 | M725T116 | 0.00064306 |
| M1067T446_1 | 8.16E-08 | M316T594 | 0.0006503 |
| M876T451 | 8.16E-08 | M258T194 | 0.0006503 |
| M904T449_2 | 8.16E-08 | M726T320 | 0.0006503 |
| M1228T450_1 | 8.19E-08 | M827T498 | 0.00066134 |
| M788T452_1 | 8.49E-08 | M165T399 | 0.00066134 |
| M926T450_2 | 8.49E-08 | M334T382 | 0.00072016 |
| M1331T452_1 | 8.49E-08 | M147T608 | 0.00072269 |
| M1272T450 | 8.49E-08 | M134T119 | 0.00074429 |
| M823T453_2 | 8.49E-08 | M245T46 | 0.0007538 |
| M848T448 | 8.49E-08 | M203T320 | 0.00087804 |
| M1022T446 | 8.49E-08 | M969T348 | 0.00089693 |
| M981T451_2 | 8.49E-08 | M1210T333 | 0.00089871 |
| M947T450 | 8.49E-08 | M745T355 | 0.00094545 |
| M903T450 | 8.49E-08 | M381T71 | 0.0010844 |
| M894T455_2 | 8.49E-08 | M127T62 | 0.0010844 |
| M926T450_1 | 8.75E-08 | M1035T285 | 0.0011479 |
| M1375T452 | 8.75E-08 | M503T496 | 0.0011479 |
| M160T540 | 8.83E-08 | M842T391 | 0.0011479 |
| M815T453 | 9.04E-08 | M92T188 | 0.001175 |
| M1052T445 | 9.29E-08 | M1312T415_2 | 0.0011899 |
| M648T452 | 1.00E-07 | M369T60_1 | 0.0012919 |
| M1081T447_2 | 1.00E-07 | M1485T385 | 0.0012942 |
| M992T452_3 | 1.02E-07 | M1003T285 | 0.0014172 |
| M814T453 | 1.05E-07 | M783T60 | 0.0014246 |
| M1169T448_3 | 1.06E-07 | M286T580 | 0.0014883 |
| M735T450_2 | 1.06E-07 | M288T120 | 0.0015726 |
| M826T447_2 | 1.06E-07 | M700T358 | 0.0015726 |
| M642T451 | 1.07E-07 | M679T382 | 0.0016279 |
| M753T451_1 | 1.09E-07 | M58T113 | 0.0016916 |
| M1154T448 | 1.09E-07 | M1312T415_1 | 0.0016916 |
| M762T451_1 | 1.09E-07 | M60T112 | 0.0018367 |
| M849T448 | 1.09E-07 | M129T654 | 0.0018367 |
| M980T451_1 | 1.09E-07 | M682T263 | 0.0018367 |
| M630T450 | 1.09E-07 | M404T66 | 0.0019438 |
| M1316T452 | 1.09E-07 | M149T524 | 0.0019745 |
| M674T452_2 | 1.09E-07 | M1166T435 | 0.0020848 |
| M1286T451_2 | 1.09E-07 | M1313T416_2 | 0.0020931 |
| M936T450_1 | 1.09E-07 | M605T348 | 0.0021028 |
| M858T455 | 1.09E-07 | M639T129 | 0.0021028 |
| M838T448 | 1.09E-07 | M955T321 | 0.0021354 |
| M1272T451_1 | 1.12E-07 | M108T247 | 0.0021373 |
| M1047T453_1 | 1.12E-07 | M745T60 | 0.0023324 |
| M1096T447_2 | 1.13E-07 | M284T321 | 0.0024221 |
| M833T453 | 1.13E-07 | M618T435_1 | 0.0024848 |
| M882T449_1 | 1.13E-07 | M1165T434 | 0.0024848 |
| M612T453_1 | 1.13E-07 | M556T176 | 0.0024848 |
| M870T448_2 | 1.13E-07 | M685T60 | 0.0025385 |
| M925T450 | 1.14E-07 | M335T60 | 0.0025755 |
| M1014T453_1 | 1.14E-07 | M670T583 | 0.0025908 |
| M1169T448_2 | 1.15E-07 | M271T582 | 0.0025997 |
| M1125T447_3 | 1.16E-07 | M707T59 | 0.0025997 |
| M969T451_1 | 1.16E-07 | M420T316 | 0.002616 |
| M849T447 | 1.24E-07 | M1313T416_1 | 0.0027257 |
| M1301T451_2 | 1.27E-07 | M805T57 | 0.0027257 |
| M978T445_2 | 1.28E-07 | M231T120 | 0.0027257 |
| M914T450 | 1.29E-07 | M395T61 | 0.0028635 |
| M660T452_1 | 1.29E-07 | M1419T343 | 0.002888 |
| M859T448 | 1.29E-07 | M603T60 | 0.0030783 |
| M1102T454 | 1.29E-07 | M743T386 | 0.0031574 |
| M1096T447_1 | 1.30E-07 | M412T173 | 0.0032632 |
| M958T451 | 1.30E-07 | M799T60 | 0.0033239 |
| M1330T452 | 1.30E-07 | M1418T343_2 | 0.0033908 |
| M936T450_2 | 1.30E-07 | M317T75 | 0.0033908 |
| M619T454 | 1.31E-07 | M680T382 | 0.0034971 |
| M694T453_1 | 1.32E-07 | M417T327 | 0.0035766 |
| M744T450_3 | 1.34E-07 | M726T116 | 0.0036406 |
| M1184T449_2 | 1.38E-07 | M906T417 | 0.0036833 |
| M841T454 | 1.39E-07 | M1484T386 | 0.0036833 |
| M949T444_2 | 1.39E-07 | M740T386 | 0.0036833 |
| M1081T447_3 | 1.42E-07 | M1419T344 | 0.0037066 |
| M1213T449_3 | 1.43E-07 | M505T60 | 0.0037066 |
| M1257T450_3 | 1.43E-07 | M1164T436 | 0.0037066 |
| M1243T450_1 | 1.43E-07 | M781T436 | 0.003798 |
| M216T540 | 1.43E-07 | M301T581 | 0.0038014 |
| M1170T448_1 | 1.43E-07 | M1212T348 | 0.0038014 |
| M868T454 | 1.52E-07 | M1418T343_1 | 0.0038014 |
| M645T451_2 | 1.53E-07 | M271T608 | 0.0038699 |
| M618T454 | 1.53E-07 | M881T60 | 0.0039841 |
| M1014T453_2 | 1.53E-07 | M1165T436 | 0.0042069 |
| M1014T452 | 1.53E-07 | M353T60 | 0.0043677 |
| M1125T447_2 | 1.53E-07 | M967T497_2 | 0.0045069 |
| M779T451 | 1.53E-07 | M365T383 | 0.0045252 |
| M1024T453_2 | 1.54E-07 | M416T288 | 0.0045509 |
| M1140T448_1 | 1.54E-07 | M724T116 | 0.0048325 |
| M779T452_2 | 1.56E-07 | M635T378 | 0.0049192 |
| M1213T449_2 | 1.61E-07 | M1271T288 | 0.0049465 |
| M1183T448 | 1.61E-07 | M916T287 | 0.0050537 |
| M603T450 | 1.61E-07 | M375T349 | 0.005071 |
| M849T454 | 1.61E-07 | M1144T380 | 0.0050732 |
| M1058T454_2 | 1.61E-07 | M744T386 | 0.0051433 |
| M667T452_2 | 1.61E-07 | M135T189 | 0.0052093 |
| M789T452 | 1.61E-07 | M708T315 | 0.0052324 |
| M654T452_1 | 1.61E-07 | M1218T347 | 0.0056444 |
| M1013T453_1 | 1.61E-07 | M699T357 | 0.0058148 |
| M711T453_1 | 1.61E-07 | M285T322 | 0.0059205 |
| M632T451_1 | 1.61E-07 | M283T596 | 0.0060078 |
| M806T453_1 | 1.64E-07 | M419T583 | 0.006017 |
| M964T445 | 1.70E-07 | M117T417 | 0.0060665 |
| M770T451 | 1.70E-07 | M467T60 | 0.0060665 |
| M704T453_1 | 1.87E-07 | M604T329 | 0.0061141 |
| M1272T451_2 | 1.92E-07 | M1482T386 | 0.0062002 |
| M1080T454_2 | 1.92E-07 | M1002T285 | 0.0062002 |
| M555T451 | 1.93E-07 | M669T583 | 0.0063757 |
| M1091T454 | 2.03E-07 | M85T393 | 0.0063757 |
| M937T450_1 | 2.03E-07 | M698T354 | 0.0064632 |
| M1198T449_2 | 2.03E-07 | M188T221 | 0.006518 |
| M1036T453 | 2.03E-07 | M209T127 | 0.0067585 |
| M981T451_3 | 2.05E-07 | M1483T386 | 0.0067585 |
| M1258T450 | 2.05E-07 | M406T331 | 0.0068252 |
| M959T450 | 2.05E-07 | M816T360 | 0.0068469 |
| M1360T452 | 2.08E-07 | M747T287 | 0.0068735 |
| M815T447 | 2.11E-07 | M151T244 | 0.0071142 |
| M652T451 | 2.16E-07 | M287T53 | 0.007115 |
| M675T452_1 | 2.23E-07 | M119T417 | 0.007115 |
| M980T451_2 | 2.24E-07 | M198T587 | 0.007115 |
| M1243T450_2 | 2.26E-07 | M629T313 | 0.0071416 |
| M638T452 | 2.28E-07 | M230T122 | 0.0072581 |
| M689T453_1 | 2.28E-07 | M1001T285 | 0.0072581 |
| M920T455 | 2.31E-07 | M814T361 | 0.0072581 |
| M682T452_1 | 2.31E-07 | M351T60 | 0.0072581 |
| M727T450 | 2.33E-07 | M1299T377 | 0.0073448 |
| M1066T446_2 | 2.33E-07 | M938T499 | 0.007494 |
| M837T447_2 | 2.33E-07 | M283T569 | 0.0077717 |
| M893T449_2 | 2.33E-07 | M606T347 | 0.0079075 |
| M753T451_2 | 2.33E-07 | M128T59 | 0.0079075 |
| M638T451_1 | 2.33E-07 | M885T358 | 0.0080021 |
| M892T448 | 2.33E-07 | M371T59 | 0.0080021 |
| M593T449 | 2.48E-07 | M726T225 | 0.0080058 |
| M593T452_1 | 2.50E-07 | M779T336 | 0.0080745 |
| M709T449_2 | 2.50E-07 | M497T288 | 0.0080806 |
| M882T449_2 | 2.51E-07 | M129T140 | 0.0080806 |
| M1198T449_1 | 2.52E-07 | M358T337 | 0.0080806 |
| M1257T450_1 | 2.52E-07 | M147T417 | 0.0080806 |
| M708T453_1 | 2.56E-07 | M628T313 | 0.0081986 |
| M816T447_1 | 2.58E-07 | M723T387 | 0.0082827 |
| M735T451 | 2.67E-07 | M201T586 | 0.0082827 |
| M991T452_1 | 2.67E-07 | M682T318 | 0.0084253 |
| M903T449 | 2.71E-07 | M429T500 | 0.008482 |
| M744T450_1 | 2.83E-07 | M566T66 | 0.008482 |
| M679T453_1 | 2.83E-07 | M1011T285 | 0.0084979 |
| M732T450 | 2.83E-07 | M537T288 | 0.0085161 |
| M623T451_1 | 2.88E-07 | M966T497 | 0.0085939 |
| M1257T450_2 | 2.88E-07 | M163T246 | 0.0085939 |
| M571T453 | 2.94E-07 | M625T59 | 0.0087213 |
| M682T453 | 2.99E-07 | M915T287_2 | 0.0087213 |
| M1069T454_2 | 3.06E-07 | M557T377 | 0.0087213 |
| M581T452_1 | 3.06E-07 | M742T386 | 0.0087213 |
| M859T451 | 3.09E-07 | M380T344 | 0.0087213 |
| M1214T449 | 3.09E-07 | M741T386 | 0.0087213 |
| M594T450_1 | 3.18E-07 | M998T461 | 0.0087214 |
| M1003T452_2 | 3.28E-07 | M372T310 | 0.0088462 |
| M632T451_2 | 3.28E-07 | M549T61 | 0.0088462 |
| M1091T455 | 3.31E-07 | M360T292 | 0.0088462 |
| M1345T452_2 | 3.35E-07 | M954T498 | 0.0089949 |
| M704T453_2 | 3.35E-07 | M1420T345 | 0.0089949 |
| M1111T447_1 | 3.35E-07 | M680T319 | 0.0089949 |
| M657T452_2 | 3.53E-07 | M151T368 | 0.0089949 |
| M793T447 | 3.55E-07 | M641T59 | 0.0089949 |
| M649T452 | 3.55E-07 | M329T581 | 0.0090186 |
| M915T449_1 | 3.57E-07 | M1219T347_1 | 0.0091525 |
| M1360T453 | 3.61E-07 | M146T60 | 0.0092125 |
| M1140T448_2 | 3.64E-07 | M705T359 | 0.0093233 |
| M616T450_1 | 3.70E-07 | M505T496 | 0.0093233 |
| M575T452_1 | 3.70E-07 | M360T141 | 0.0093233 |
| M744T450_2 | 3.76E-07 | M815T361 | 0.0093233 |
| M770T452 | 3.82E-07 | M332T311 | 0.0093233 |
| M894T456 | 3.82E-07 | M81T653 | 0.0093233 |
| M993T445_2 | 3.86E-07 | M463T462 | 0.0095393 |
| M568T451 | 3.87E-07 | M1378T338 | 0.0095554 |
| M1169T448_1 | 3.99E-07 | M502T336 | 0.0097555 |
| M672T452_1 | 4.06E-07 | M1223T285 | 0.0097555 |
| M726T454 | 4.13E-07 | M1243T392 | 0.0097926 |
| M733T454_2 | 4.13E-07 | M967T497_1 | 0.0097926 |
| M871T448_1 | 4.28E-07 | M383T59 | 0.010304 |
| M689T453_2 | 4.36E-07 | M1032T408 | 0.010304 |
| M755T454_1 | 4.40E-07 | M1219T347_2 | 0.010414 |
| M755T454_2 | 4.62E-07 | M562T325 | 0.010414 |
| M637T454 | 4.62E-07 | M562T124 | 0.010414 |
| M613T451_2 | 4.66E-07 | M318T329 | 0.010466 |
| M708T453_2 | 4.66E-07 | M1129T289 | 0.010466 |
| M654T452_2 | 4.69E-07 | M150T496 | 0.010629 |
| M771T451 | 4.69E-07 | M305T498 | 0.010629 |
| M701T453_1 | 4.73E-07 | M785T389 | 0.010678 |
| M1024T453_1 | 4.75E-07 | M428T435 | 0.010729 |
| M718T450 | 4.75E-07 | M1238T364 | 0.01082 |
| M1316T451_2 | 4.80E-07 | M287T580 | 0.010882 |
| M653T451 | 5.20E-07 | M290T118 | 0.010882 |
| M1113T455 | 5.33E-07 | M120T417 | 0.010935 |
| M1213T449_1 | 5.39E-07 | M346T288 | 0.01108 |
| M667T451 | 5.42E-07 | M1389T414_1 | 0.011215 |
| M581T452_3 | 5.46E-07 | M469T85 | 0.011246 |
| M637T452 | 5.50E-07 | M565T61 | 0.011246 |
| M881T448 | 5.58E-07 | M599T139 | 0.011573 |
| M1287T451_2 | 5.58E-07 | M243T345 | 0.011573 |
| M579T451 | 5.72E-07 | M713T311 | 0.011812 |
| M624T452 | 5.77E-07 | M591T371 | 0.011812 |
| M700T450_2 | 6.01E-07 | M617T362 | 0.011831 |
| M770T455 | 6.08E-07 | M577T351 | 0.01202 |
| M920T444 | 6.14E-07 | M1224T286 | 0.012276 |
| M587T453_1 | 6.43E-07 | M592T305 | 0.012276 |
| M780T452_1 | 6.43E-07 | M131T393 | 0.01237 |
| M747T454 | 6.52E-07 | M1076T285 | 0.012404 |
| M755T455 | 6.52E-07 | M900T336 | 0.012404 |
| M659T452_1 | 6.82E-07 | M286T339 | 0.012404 |
| M669T452_3 | 6.92E-07 | M493T59 | 0.012404 |
| M709T449_1 | 6.95E-07 | M954T499 | 0.012404 |
| M700T450_1 | 7.35E-07 | M330T364 | 0.012466 |
| M797T452_2 | 7.49E-07 | M273T568 | 0.012482 |
| M372T383_1 | 7.49E-07 | M981T499 | 0.012582 |
| M1390T453 | 7.49E-07 | M618T421 | 0.012781 |
| M937T450_2 | 7.65E-07 | M389T440 | 0.012781 |
| M733T454_1 | 7.86E-07 | M792T420 | 0.012845 |
| M1037T446_2 | 7.86E-07 | M567T60 | 0.012845 |
| M659T452_3 | 7.86E-07 | M258T296 | 0.013026 |
| M740T454_2 | 8.10E-07 | M267T176 | 0.013041 |
| M1002T452_1 | 8.11E-07 | M357T290 | 0.0136 |
| M686T453 | 8.25E-07 | M1390T415 | 0.01368 |
| M805T452 | 8.25E-07 | M147T141 | 0.013791 |
| M601T451 | 8.37E-07 | M659T680 | 0.013955 |
| M1069T454_3 | 8.44E-07 | M149T496 | 0.013988 |
| M691T449 | 8.44E-07 | M344T363 | 0.013988 |
| M1047T454 | 8.46E-07 | M342T379 | 0.013988 |
| M647T451_2 | 8.54E-07 | M129T402 | 0.013988 |
| M779T452_1 | 8.63E-07 | M187T190 | 0.013988 |
| M676T452_2 | 8.80E-07 | M165T417 | 0.014075 |
| M645T451_1 | 8.97E-07 | M1220T347 | 0.014112 |
| M761T451 | 9.09E-07 | M136T63 | 0.01416 |
| M599T453 | 9.09E-07 | M739T57 | 0.014464 |
| M723T453 | 9.09E-07 | M302T289 | 0.014515 |
| M914T449 | 9.33E-07 | M314T324 | 0.014573 |
| M1227T449 | 9.33E-07 | M204T424 | 0.014573 |
| M585T452 | 9.33E-07 | M299T570 | 0.014573 |
| M643T454 | 9.41E-07 | M968T498 | 0.014573 |
| M726T450 | 9.53E-07 | M636T353 | 0.014626 |
| M608T450 | 9.57E-07 | M451T61 | 0.014745 |
| M609T453 | 9.64E-07 | M248T698 | 0.014823 |
| M637T453 | 9.64E-07 | M1068T287 | 0.014823 |
| M589T453_1 | 9.64E-07 | M229T358 | 0.014921 |
| M627T452_2 | 9.64E-07 | M1491T391 | 0.014921 |
| M788T452_2 | 9.64E-07 | M1270T288 | 0.014921 |
| M1184T448 | 9.70E-07 | M1487T349 | 0.015108 |
| M573T453 | 9.72E-07 | M233T60 | 0.015108 |
| M793T450 | 9.74E-07 | M1069T287 | 0.015135 |
| M704T453_3 | 9.75E-07 | M568T337 | 0.015215 |
| M885T455_2 | 9.90E-07 | M214T547 | 0.015537 |
| M587T453_2 | 1.00E-06 | M166T122 | 0.015695 |
| M629T452 | 1.02E-06 | M387T438 | 0.016247 |
| M741T453 | 1.03E-06 | M671T324 | 0.016247 |
| M748T454_1 | 1.07E-06 | M288T294 | 0.016247 |
| M588T452 | 1.08E-06 | M753T583 | 0.016247 |
| M698T453_1 | 1.09E-06 | M487T378 | 0.016247 |
| M1125T447_1 | 1.09E-06 | M746T287 | 0.0164 |
| M658T452_2 | 1.12E-06 | M298T287 | 0.0164 |
| M1242T450 | 1.12E-06 | M1360T335 | 0.0164 |
| M625T454_2 | 1.12E-06 | M667T325 | 0.016443 |
| M824T453_2 | 1.19E-06 | M611T326 | 0.016452 |
| M1068T454 | 1.24E-06 | M783T329 | 0.016694 |
| M681T453 | 1.25E-06 | M473T352 | 0.016847 |
| M886T382 | 1.25E-06 | M1389T414_2 | 0.017047 |
| M1345T452_1 | 1.25E-06 | M1486T349 | 0.017667 |
| M679T452_1 | 1.27E-06 | M728T313 | 0.017794 |
| M745T454_1 | 1.28E-06 | M187T110 | 0.017831 |
| M937T449 | 1.38E-06 | M647T61 | 0.017883 |
| M657T452_1 | 1.40E-06 | M654T500 | 0.018017 |
| M602T453 | 1.41E-06 | M553T363 | 0.018047 |
| M663T454 | 1.41E-06 | M374T309 | 0.018252 |
| M593T452_2 | 1.48E-06 | M940T318 | 0.018252 |
| M1228T449 | 1.55E-06 | M443T357 | 0.018433 |
| M805T446 | 1.56E-06 | M1390T414 | 0.018757 |
| M959T451 | 1.56E-06 | M360T383 | 0.018757 |
| M645T452 | 1.58E-06 | M107T367 | 0.01887 |
| M635T451_2 | 1.59E-06 | M346T309 | 0.019005 |
| M681T452 | 1.59E-06 | M102T60 | 0.019088 |
| M675T452_2 | 1.62E-06 | M652T350_1 | 0.019088 |
| M696T453_1 | 1.62E-06 | M1238T332 | 0.019347 |
| M600T452 | 1.62E-06 | M681T387 | 0.019407 |
| M647T452 | 1.63E-06 | M300T363 | 0.019802 |
| M762T451_2 | 1.63E-06 | M525T356 | 0.020051 |
| M1140T448_3 | 1.65E-06 | M574T372 | 0.020052 |
| M600T453_1 | 1.65E-06 | M738T386 | 0.020813 |
| M758T451 | 1.65E-06 | M916T393 | 0.021239 |
| M615T452 | 1.73E-06 | M261T348 | 0.021497 |
| M871T448_2 | 1.75E-06 | M761T60 | 0.021504 |
| M815T452 | 1.75E-06 | M201T565 | 0.02166 |
| M641T452 | 1.76E-06 | M651T350 | 0.02166 |
| M649T451_2 | 1.78E-06 | M166T417 | 0.021827 |
| M651T452 | 1.82E-06 | M313T584 | 0.021895 |
| M717T451 | 1.86E-06 | M912T372 | 0.022413 |
| M616T450_2 | 1.86E-06 | M571T356 | 0.022413 |
| M696T453_2 | 1.94E-06 | M939T318 | 0.022872 |
| M684T452 | 1.97E-06 | M687T288 | 0.022872 |
| M625T452 | 1.97E-06 | M343T576 | 0.022872 |
| M1090T455 | 1.97E-06 | M223T320 | 0.022982 |
| M674T448 | 2.00E-06 | M97T721 | 0.022998 |
| M741T454_1 | 2.04E-06 | M1166T355 | 0.022998 |
| M725T453 | 2.06E-06 | M290T45 | 0.022998 |
| M711T453_2 | 2.06E-06 | M458T303 | 0.023629 |
| M735T450_1 | 2.09E-06 | M570T357 | 0.023714 |
| M610T453_1 | 2.09E-06 | M870T328 | 0.024053 |
| M701T452 | 2.09E-06 | M117T213 | 0.024057 |
| M621T453_2 | 2.09E-06 | M706T289 | 0.024183 |
| M639T451_2 | 2.10E-06 | M1300T378 | 0.024452 |
| M564T452_2 | 2.16E-06 | M1301T379 | 0.024531 |
| M682T452_2 | 2.22E-06 | M651T127 | 0.024531 |
| M666T452_1 | 2.22E-06 | M785T349 | 0.024531 |
| M661T451 | 2.24E-06 | M619T334_1 | 0.024531 |
| M613T452 | 2.33E-06 | M971T286 | 0.024531 |
| M623T451_2 | 2.35E-06 | M660T362 | 0.024531 |
| M639T451_1 | 2.38E-06 | M1067T287 | 0.024792 |
| M674T452_1 | 2.42E-06 | M1164T421 | 0.025282 |
| M569T452 | 2.51E-06 | M1242T392 | 0.025318 |
| M660T452_3 | 2.57E-06 | M408T304 | 0.025318 |
| M733T454_3 | 2.57E-06 | M827T59 | 0.025318 |
| M717T450 | 2.57E-06 | M393T316 | 0.025318 |
| M672T452_2 | 2.60E-06 | M738T318 | 0.025318 |
| M622T451_2 | 2.61E-06 | M372T367 | 0.025318 |
| M578T453_1 | 2.62E-06 | M998T445 | 0.02562 |
| M915T449_2 | 2.66E-06 | M737T318 | 0.025736 |
| M613T451_3 | 2.68E-06 | M161T588 | 0.025736 |
| M631T451_1 | 2.68E-06 | M1375T372 | 0.025767 |
| M719T453 | 2.72E-06 | M355T55 | 0.025767 |
| M719T454 | 2.80E-06 | M897T60 | 0.025767 |
| M569T449 | 2.80E-06 | M508T319 | 0.025981 |
| M651T451 | 2.80E-06 | M332T287 | 0.026264 |
| M550T451 | 2.80E-06 | M316T337 | 0.026264 |
| M625T454_3 | 2.83E-06 | M681T280 | 0.026271 |
| M607T450 | 2.94E-06 | M745T325 | 0.026271 |
| M650T452_1 | 2.94E-06 | M371T318 | 0.026288 |
| M796T452 | 2.97E-06 | M579T329 | 0.026352 |
| M644T451_1 | 3.02E-06 | M630T293 | 0.026352 |
| M525T382 | 3.04E-06 | M365T464 | 0.026352 |
| M528T382 | 3.06E-06 | M344T292 | 0.026366 |
| M547T451_1 | 3.08E-06 | M609T59 | 0.026545 |
| M629T451 | 3.08E-06 | M402T506 | 0.026545 |
| M629T372 | 3.09E-06 | M739T317 | 0.02659 |
| M635T451_1 | 3.15E-06 | M954T403 | 0.02659 |
| M629T454_1 | 3.15E-06 | M972T286 | 0.027116 |
| M646T451_2 | 3.22E-06 | M563T123 | 0.027189 |
| M613T451_1 | 3.26E-06 | M357T506 | 0.027426 |
| M970T451_3 | 3.28E-06 | M261T330 | 0.027493 |
| M584T451 | 3.36E-06 | M727T313 | 0.027493 |
| M597T450 | 3.38E-06 | M375T309 | 0.027775 |
| M630T452 | 3.43E-06 | M1027T325 | 0.027976 |
| M925T449 | 3.45E-06 | M1492T391 | 0.028438 |
| M929T456 | 3.58E-06 | M356T393 | 0.028446 |
| M562T450 | 3.58E-06 | M1068T376_2 | 0.028524 |
| M564T452_1 | 3.58E-06 | M786T350 | 0.028524 |
| M691T450 | 3.60E-06 | M884T356 | 0.028648 |
| M744T450_4 | 3.70E-06 | M759T365 | 0.028936 |
| M676T452_3 | 3.73E-06 | M1360T341 | 0.029041 |
| M1101T455 | 3.74E-06 | M444T312 | 0.029346 |
| M663T452 | 3.79E-06 | M130T300 | 0.029397 |
| M710T454 | 3.84E-06 | M245T246 | 0.029421 |
| M771T448 | 3.87E-06 | M478T293 | 0.029581 |
| M631T453 | 3.87E-06 | M1342T289 | 0.02959 |
| M497T351 | 3.90E-06 | M653T350 | 0.02959 |
| M599T451 | 3.91E-06 | M579T332 | 0.02959 |
| M656T452 | 3.92E-06 | M1268T284 | 0.029609 |
| M823T453_1 | 4.03E-06 | M888T285 | 0.02967 |
| M827T447_1 | 4.09E-06 | M663T61 | 0.030249 |
| M703T453 | 4.21E-06 | M1259T338 | 0.030249 |
| M615T450 | 4.25E-06 | M259T358 | 0.030275 |
| M704T453_4 | 4.28E-06 | M904T394 | 0.03036 |
| M647T451_1 | 4.31E-06 | M597T381 | 0.03036 |
| M578T453_2 | 4.52E-06 | M701T60 | 0.03076 |
| M771T447 | 4.52E-06 | M1196T367 | 0.03087 |
| M626T453 | 4.52E-06 | M278T312 | 0.030872 |
| M691T452 | 4.55E-06 | M369T499 | 0.031282 |
| M755T451 | 4.55E-06 | M571T59 | 0.031381 |
| M635T452 | 4.55E-06 | M998T444 | 0.031472 |
| M589T453_3 | 4.56E-06 | M1362T385 | 0.032251 |
| M947T451 | 4.66E-06 | M321T583 | 0.032303 |
| M597T453 | 4.66E-06 | M1374T372 | 0.032687 |
| M648T453 | 4.76E-06 | M244T345 | 0.032901 |
| M686T452 | 4.87E-06 | M1078T285 | 0.032901 |
| M590T449 | 4.98E-06 | M1152T318 | 0.033516 |
| M691T453 | 5.04E-06 | M783T388 | 0.0346 |
| M625T454_1 | 5.06E-06 | M328T356 | 0.035463 |
| M570T451 | 5.06E-06 | M784T388 | 0.035575 |
| M1058T454_3 | 5.12E-06 | M244T298 | 0.035719 |
| M694T453_2 | 5.12E-06 | M1303T350 | 0.035719 |
| M610T453_2 | 5.14E-06 | M1149T284 | 0.036287 |
| M591T450 | 5.19E-06 | M1152T291 | 0.036328 |
| M1047T453_2 | 5.23E-06 | M713T368 | 0.036328 |
| M529T383 | 5.26E-06 | M1206T330 | 0.036328 |
| M543T452_2 | 5.26E-06 | M1077T285 | 0.036328 |
| M700T449 | 5.29E-06 | M566T289 | 0.036328 |
| M632T453 | 5.30E-06 | M1213T377 | 0.036421 |
| M683T453_2 | 5.39E-06 | M1415T384 | 0.036613 |
| M653T452_2 | 5.61E-06 | M459T137 | 0.036842 |
| M592T451 | 5.64E-06 | M990T285 | 0.036868 |
| M744T383 | 5.65E-06 | M399T496 | 0.036893 |
| M707T451 | 5.66E-06 | M703T379 | 0.038145 |
| M692T453_2 | 6.06E-06 | M1072T284 | 0.038278 |
| M595T453_1 | 6.10E-06 | M1068T376_1 | 0.03842 |
| M716T454 | 6.22E-06 | M376T393 | 0.03842 |
| M697T452_1 | 6.26E-06 | M977T399 | 0.03842 |
| M597T451 | 6.34E-06 | M511T266 | 0.038779 |
| M585T453 | 6.46E-06 | M900T391 | 0.038817 |
| M627T452_1 | 6.46E-06 | M937T499_2 | 0.038879 |
| M560T452_2 | 6.46E-06 | M905T394_1 | 0.038891 |
| M700T453 | 6.48E-06 | M1435T291 | 0.039164 |
| M644T452 | 6.65E-06 | M1269T287 | 0.040496 |
| M646T452 | 6.65E-06 | M797T370 | 0.040496 |
| M634T451_1 | 6.97E-06 | M616T363 | 0.040496 |
| M693T453 | 6.97E-06 | M544T339 | 0.040986 |
| M642T452 | 7.03E-06 | M938T437 | 0.041004 |
| M571T452 | 7.03E-06 | M840T420 | 0.041004 |
| M643T452_1 | 7.12E-06 | M275T68 | 0.041064 |
| M701T453_2 | 7.43E-06 | M984T377 | 0.041064 |
| M602T450 | 7.73E-06 | M605T436 | 0.041135 |
| M678T453_1 | 7.84E-06 | M1030T285 | 0.041679 |
| M664T452 | 7.87E-06 | M518T350 | 0.041679 |
| M566T452_1 | 7.87E-06 | M806T417 | 0.041679 |
| M671T452_1 | 7.93E-06 | M230T311 | 0.041679 |
| M666T453 | 7.97E-06 | M285T579 | 0.041679 |
| M696T452 | 8.11E-06 | M575T66 | 0.041688 |
| M697T453_1 | 8.14E-06 | M518T291 | 0.041748 |
| M611T452 | 8.25E-06 | M578T63 | 0.041858 |
| M912T456 | 8.27E-06 | M405T310 | 0.042142 |
| M707T452 | 8.34E-06 | M613T400 | 0.042233 |
| M554T451 | 8.51E-06 | M514T371 | 0.042515 |
| M666T452_2 | 8.59E-06 | M129T609 | 0.042515 |
| M638T451_4 | 8.62E-06 | M843T391 | 0.042819 |
| M715T454_2 | 8.64E-06 | M812T67 | 0.042853 |
| M668T453_1 | 8.77E-06 | M767T59 | 0.042853 |
| M688T450 | 8.77E-06 | M598T139 | 0.042875 |
| M667T452_1 | 8.78E-06 | M97T697 | 0.043372 |
| M714T453 | 8.78E-06 | M286T548 | 0.043372 |
| M605T450_1 | 8.78E-06 | M266T60 | 0.043433 |
| M583T452_1 | 8.85E-06 | M1398T419 | 0.043433 |
| M581T453 | 8.85E-06 | M302T352 | 0.043433 |
| M575T452_2 | 9.11E-06 | M269T286 | 0.043433 |
| M746T451 | 9.11E-06 | M300T341 | 0.043433 |
| M788T451 | 9.11E-06 | M858T320 | 0.043433 |
| M591T452 | 9.18E-06 | M406T380 | 0.043433 |
| M637T450 | 9.18E-06 | M1341T289 | 0.043433 |
| M742T383 | 9.30E-06 | M1362T341 | 0.043659 |
| M685T453_2 | 9.38E-06 | M422T108 | 0.043764 |
| M624T451_1 | 9.39E-06 | M1147T284 | 0.044176 |
| M806T453_2 | 9.39E-06 | M989T406 | 0.044176 |
| M660T452_2 | 9.39E-06 | M601T124 | 0.044191 |
| M580T450 | 9.55E-06 | M495T285 | 0.044329 |
| M621T451_1 | 9.59E-06 | M193T550 | 0.04437 |
| M718T453_1 | 9.59E-06 | M1239T333 | 0.046234 |
| M724T454 | 9.91E-06 | M651T66 | 0.046433 |
| M638T451_2 | 9.99E-06 | M714T318 | 0.046579 |
| M660T453 | 9.99E-06 | M780T336 | 0.046608 |
| M661T452 | 9.99E-06 | M970T286 | 0.046697 |
| M702T453_2 | 9.99E-06 | M364T383 | 0.046722 |
| M614T452_1 | 9.99E-06 | M357T331 | 0.046722 |
| M541T451_2 | 9.99E-06 | M966T469 | 0.046836 |
| M746T453 | 1.01E-05 | M875T291 | 0.048037 |
| M485T452 | 1.01E-05 | M185T310 | 0.048037 |
| M612T450_1 | 1.02E-05 | M416T367 | 0.048037 |
| M619T451_2 | 1.02E-05 | M265T661 | 0.048037 |
| M720T454_1 | 1.02E-05 | M1361T341 | 0.04815 |
| M970T451_2 | 1.03E-05 | M477T62 | 0.048194 |
| M614T453 | 1.03E-05 | M1075T284 | 0.048194 |
| M663T451 | 1.03E-05 | M314T584 | 0.048194 |
| M586T449 | 1.05E-05 | M1490T391 | 0.048194 |
| M553T452_1 | 1.07E-05 | M618T420 | 0.048194 |
| M718T453_2 | 1.08E-05 | M321T396 | 0.048446 |
| M606T453 | 1.09E-05 | M566T342_1 | 0.048446 |
| M638T382 | 1.09E-05 | M157T246 | 0.048446 |
| M758T452 | 1.09E-05 | M854T319 | 0.048446 |
| M617T451 | 1.12E-05 | M576T351 | 0.048698 |
| M580T451 | 1.12E-05 | M187T299 | 0.049114 |
| M539T451 | 1.13E-05 | M715T329 | 0.049226 |
| M620T452_2 | 1.14E-05 | M183T176 | 0.049726 |
| M594T450_2 | 1.15E-05 |  |  |
| M641T451_2 | 1.16E-05 |  |  |
| M685T453_1 | 1.17E-05 |  |  |
| M425T382 | 1.17E-05 |  |  |
| M675T453 | 1.17E-05 |  |  |
| M705T452 | 1.17E-05 |  |  |
| M519T451 | 1.18E-05 |  |  |
| M743T383 | 1.18E-05 |  |  |
| M589T453_2 | 1.21E-05 |  |  |
| M631T452 | 1.25E-05 |  |  |
| M584T452 | 1.28E-05 |  |  |
| M607T452 | 1.40E-05 |  |  |
| M441T452 | 1.45E-05 |  |  |
| M623T453 | 1.47E-05 |  |  |
| M682T452_3 | 1.47E-05 |  |  |
| M738T453 | 1.48E-05 |  |  |
| M677T451 | 1.50E-05 |  |  |
| M653T452_1 | 1.52E-05 |  |  |
| M551T451_2 | 1.58E-05 |  |  |
| M608T454 | 1.62E-05 |  |  |
| M608T453 | 1.64E-05 |  |  |
| M576T453 | 1.65E-05 |  |  |
| M595T453_3 | 1.65E-05 |  |  |
| M697T453_2 | 1.68E-05 |  |  |
| M624T451_2 | 1.72E-05 |  |  |
| M628T451_1 | 1.76E-05 |  |  |
| M762T454 | 1.79E-05 |  |  |
| M570T452 | 1.81E-05 |  |  |
| M683T453_1 | 1.82E-05 |  |  |
| M616T450_3 | 1.83E-05 |  |  |
| M576T452_2 | 1.86E-05 |  |  |
| M622T453 | 1.88E-05 |  |  |
| M545T452 | 1.88E-05 |  |  |
| M545T451 | 1.91E-05 |  |  |
| M619T452 | 1.91E-05 |  |  |
| M669T452_1 | 1.93E-05 |  |  |
| M695T452_1 | 1.94E-05 |  |  |
| M582T453 | 1.96E-05 |  |  |
| M781T383 | 1.97E-05 |  |  |
| M265T452 | 2.03E-05 |  |  |
| M712T453_1 | 2.07E-05 |  |  |
| M629T454_2 | 2.07E-05 |  |  |
| M688T453_1 | 2.07E-05 |  |  |
| M601T452 | 2.09E-05 |  |  |
| M736T450 | 2.18E-05 |  |  |
| M609T451_1 | 2.18E-05 |  |  |
| M603T452 | 2.23E-05 |  |  |
| M633T451 | 2.28E-05 |  |  |
| M636T452_1 | 2.28E-05 |  |  |
| M622T451_1 | 2.38E-05 |  |  |
| M528T452 | 2.44E-05 |  |  |
| M719T451 | 2.47E-05 |  |  |
| M657T452_3 | 2.48E-05 |  |  |
| M637T382 | 2.58E-05 |  |  |
| M584T450_2 | 2.58E-05 |  |  |
| M562T452 | 2.58E-05 |  |  |
| M715T453 | 2.58E-05 |  |  |
| M544T451 | 2.58E-05 |  |  |
| M310T382 | 2.59E-05 |  |  |
| M672T452_3 | 2.59E-05 |  |  |
| M585T366 | 2.62E-05 |  |  |
| M619T451_1 | 2.63E-05 |  |  |
| M721T452 | 2.63E-05 |  |  |
| M653T453 | 2.64E-05 |  |  |
| M641T454 | 2.64E-05 |  |  |
| M187T382 | 2.68E-05 |  |  |
| M648T454 | 2.76E-05 |  |  |
| M609T451_2 | 2.76E-05 |  |  |
| M577T449 | 2.76E-05 |  |  |
| M587T449 | 2.85E-05 |  |  |
| M526T450 | 2.86E-05 |  |  |
| M601T449 | 2.92E-05 |  |  |
| M1188T372 | 2.95E-05 |  |  |
| M631T451_2 | 2.95E-05 |  |  |
| M653T452_3 | 2.95E-05 |  |  |
| M646T451_1 | 2.97E-05 |  |  |
| M695T452_2 | 2.97E-05 |  |  |
| M688T453_2 | 2.97E-05 |  |  |
| M535T451 | 2.97E-05 |  |  |
| M612T453_2 | 3.02E-05 |  |  |
| M656T454 | 3.13E-05 |  |  |
| M719T452 | 3.23E-05 |  |  |
| M650T452_2 | 3.38E-05 |  |  |
| M668T453_2 | 3.41E-05 |  |  |
| M612T450_2 | 3.43E-05 |  |  |
| M503T275_1 | 3.52E-05 |  |  |
| M690T453_1 | 3.53E-05 |  |  |
| M617T453 | 3.57E-05 |  |  |
| M763T451 | 3.71E-05 |  |  |
| M587T452 | 3.72E-05 |  |  |
| M713T453 | 3.75E-05 |  |  |
| M1420T336 | 3.97E-05 |  |  |
| M553T452_2 | 3.98E-05 |  |  |
| M566T452_2 | 3.99E-05 |  |  |
| M584T450_1 | 4.02E-05 |  |  |
| M590T450 | 4.05E-05 |  |  |
| M599T450_1 | 4.08E-05 |  |  |
| M668T452 | 4.14E-05 |  |  |
| M626T451 | 4.14E-05 |  |  |
| M628T452 | 4.18E-05 |  |  |
| M594T450_3 | 4.27E-05 |  |  |
| M644T453 | 4.31E-05 |  |  |
| M614T452_2 | 4.46E-05 |  |  |
| M557T452 | 4.50E-05 |  |  |
| M762T590 | 4.54E-05 |  |  |
| M665T452_1 | 4.57E-05 |  |  |
| M737T453 | 4.64E-05 |  |  |
| M745T451 | 4.70E-05 |  |  |
| M621T451_2 | 4.71E-05 |  |  |
| M656T451 | 4.71E-05 |  |  |
| M604T453_2 | 4.75E-05 |  |  |
| M802T452 | 4.80E-05 |  |  |
| M673T452_1 | 4.85E-05 |  |  |
| M534T452_1 | 4.94E-05 |  |  |
| M529T452 | 5.00E-05 |  |  |
| M604T453_1 | 5.21E-05 |  |  |
| M539T452 | 5.26E-05 |  |  |
| M591T453 | 5.32E-05 |  |  |
| M494T453 | 5.58E-05 |  |  |
| M730T453 | 5.63E-05 |  |  |
| M669T452_2 | 5.65E-05 |  |  |
| M670T452 | 5.69E-05 |  |  |
| M673T377 | 5.85E-05 |  |  |
| M583T452_2 | 6.04E-05 |  |  |
| M579T452 | 6.12E-05 |  |  |
| M551T452 | 6.22E-05 |  |  |
| M607T451 | 6.25E-05 |  |  |
| M567T454 | 6.52E-05 |  |  |
| M700T451 | 6.66E-05 |  |  |
| M565T450 | 6.75E-05 |  |  |
| M674T450 | 6.91E-05 |  |  |
| M662T452 | 7.03E-05 |  |  |
| M559T453 | 7.03E-05 |  |  |
| M638T451_3 | 7.10E-05 |  |  |
| M547T451_2 | 7.32E-05 |  |  |
| M643T452_2 | 7.53E-05 |  |  |
| M538T452 | 7.97E-05 |  |  |
| M687T453_1 | 8.25E-05 |  |  |
| M606T450 | 8.28E-05 |  |  |
| M598T453 | 8.30E-05 |  |  |
| M606T451_2 | 8.47E-05 |  |  |
| M673T452_2 | 8.49E-05 |  |  |
| M634T451_2 | 8.49E-05 |  |  |
| M749T451 | 8.58E-05 |  |  |
| M213T54 | 8.66E-05 |  |  |
| M644T451_2 | 9.04E-05 |  |  |
| M692T453_1 | 9.32E-05 |  |  |
| M560T452_1 | 9.93E-05 |  |  |
| M628T451_2 | 0.00010055 |  |  |
| M572T452 | 0.00010111 |  |  |
| M604T451 | 0.0001018 |  |  |
| M558T451 | 0.00010708 |  |  |
| M694T452 | 0.00010715 |  |  |
| M767T453 | 0.00011085 |  |  |
| M486T311 | 0.00011085 |  |  |
| M487T344 | 0.00012019 |  |  |
| M736T454 | 0.00012495 |  |  |
| M947T337_2 | 0.00012984 |  |  |
| M551T451_1 | 0.00013481 |  |  |
| M197T55 | 0.00013776 |  |  |
| M1485T382 | 0.00013974 |  |  |
| M560T452_3 | 0.00014257 |  |  |
| M211T384 | 0.00014639 |  |  |
| M616T452 | 0.00014941 |  |  |
| M947T336 | 0.00015004 |  |  |
| M550T452 | 0.00015253 |  |  |
| M812T453 | 0.00015267 |  |  |
| M609T450 | 0.00016408 |  |  |
| M653T345 | 0.00016722 |  |  |
| M669T454 | 0.00016816 |  |  |
| M679T452_2 | 0.00017823 |  |  |
| M1293T398_1 | 0.00017891 |  |  |
| M702T453_1 | 0.00018647 |  |  |
| M685T453_3 | 0.00018926 |  |  |
| M688T453_3 | 0.00018926 |  |  |
| M784T454 | 0.00019743 |  |  |
| M723T454 | 0.0002008 |  |  |
| M639T381 | 0.00020343 |  |  |
| M712T454 | 0.00022517 |  |  |
| M780T383 | 0.00022644 |  |  |
| M649T451_1 | 0.00022847 |  |  |
| M665T452_2 | 0.00023303 |  |  |
| M516T452 | 0.00024234 |  |  |
| M996T434 | 0.00026328 |  |  |
| M1189T372 | 0.00027296 |  |  |
| M563T451 | 0.00028035 |  |  |
| M589T451 | 0.00029139 |  |  |
| M856T454 | 0.00029621 |  |  |
| M557T324 | 0.00029696 |  |  |
| M541T362 | 0.00029939 |  |  |
| M887T382 | 0.00030934 |  |  |
| M570T453 | 0.00031536 |  |  |
| M717T382 | 0.00032717 |  |  |
| M595T450 | 0.00033153 |  |  |
| M537T277 | 0.00038141 |  |  |
| M947T337_1 | 0.00038141 |  |  |
| M1260T331 | 0.00039855 |  |  |
| M1261T330 | 0.00042951 |  |  |
| M1261T323 | 0.00043515 |  |  |
| M761T590 | 0.00043692 |  |  |
| M918T279 | 0.00048499 |  |  |
| M595T453_2 | 0.00048499 |  |  |
| M568T452 | 0.00048499 |  |  |
| M1206T315_1 | 0.00050836 |  |  |
| M531T658 | 0.0005213 |  |  |
| M498T357 | 0.00052294 |  |  |
| M948T336 | 0.00053321 |  |  |
| M391T383 | 0.00054347 |  |  |
| M687T453_2 | 0.00054739 |  |  |
| M487T311 | 0.00056018 |  |  |
| M620T452_1 | 0.00067567 |  |  |
| M654T345_1 | 0.00070333 |  |  |
| M1363T335_1 | 0.00071712 |  |  |
| M1484T382 | 0.00075893 |  |  |
| M1070T373 | 0.00076972 |  |  |
| M630T373 | 0.00077253 |  |  |
| M459T452 | 0.00078205 |  |  |
| M657T452_4 | 0.00078276 |  |  |
| M651T453 | 0.00083572 |  |  |
| M1206T315_2 | 0.00083612 |  |  |
| M968T302 | 0.00084701 |  |  |
| M197T342 | 0.00086639 |  |  |
| M937T399 | 0.00088584 |  |  |
| M114T654 | 0.00089838 |  |  |
| M629T311 | 0.00090511 |  |  |
| M1291T303_1 | 0.00091224 |  |  |
| M1363T335_2 | 0.00094533 |  |  |
| M585T451 | 0.0010138 |  |  |
| M938T398 | 0.0011066 |  |  |
| M586T367 | 0.0011365 |  |  |
| M906T391 | 0.0011678 |  |  |
| M714T372_2 | 0.0012372 |  |  |
| M503T450 | 0.0012679 |  |  |
| M542T360 | 0.0012727 |  |  |
| M654T345_2 | 0.0012747 |  |  |
| M1071T353 | 0.0012817 |  |  |
| M1294T398_1 | 0.0013042 |  |  |
| M654T450 | 0.0013042 |  |  |
| M690T452 | 0.0013227 |  |  |
| M1290T303 | 0.0013476 |  |  |
| M811T580 | 0.0014258 |  |  |
| M1421T334_1 | 0.0015082 |  |  |
| M996T435 | 0.0015096 |  |  |
| M969T451_2 | 0.0015355 |  |  |
| M386T65 | 0.0015462 |  |  |
| M1072T353 | 0.0015879 |  |  |
| M753T450 | 0.0017136 |  |  |
| M1189T371 | 0.0017383 |  |  |
| M1305T345 | 0.0018216 |  |  |
| M598T451 | 0.0018348 |  |  |
| M683T382 | 0.0018918 |  |  |
| M503T361 | 0.0019154 |  |  |
| M373T382 | 0.0019181 |  |  |
| M338T274_2 | 0.0020344 |  |  |
| M909T335 | 0.0021115 |  |  |
| M345T274 | 0.0021247 |  |  |
| M283T314 | 0.0021542 |  |  |
| M297T275_1 | 0.0021942 |  |  |
| M372T383_2 | 0.0021942 |  |  |
| M416T397 | 0.0022121 |  |  |
| M1310T305_2 | 0.0022726 |  |  |
| M920T330 | 0.0023157 |  |  |
| M425T323 | 0.0023635 |  |  |
| M559T67 | 0.0024265 |  |  |
| M1362T334 | 0.0024397 |  |  |
| M849T393 | 0.0024426 |  |  |
| M674T377 | 0.0025229 |  |  |
| M1220T341 | 0.0025537 |  |  |
| M917T278 | 0.0025773 |  |  |
| M797T446 | 0.0025866 |  |  |
| M722T456 | 0.0026516 |  |  |
| M433T58 | 0.0027086 |  |  |
| M909T334 | 0.0027086 |  |  |
| M676T451 | 0.0027086 |  |  |
| M605T450_2 | 0.0028285 |  |  |
| M808T415 | 0.0028307 |  |  |
| M1294T398_2 | 0.0028505 |  |  |
| M520T361 | 0.0029305 |  |  |
| M86T47 | 0.002958 |  |  |
| M365T322 | 0.0030179 |  |  |
| M327T326 | 0.0030897 |  |  |
| M557T327 | 0.0030897 |  |  |
| M948T337 | 0.0031874 |  |  |
| M747T388 | 0.0033467 |  |  |
| M371T53 | 0.0033584 |  |  |
| M387T53 | 0.0033971 |  |  |
| M1261T326_1 | 0.0034438 |  |  |
| M422T66 | 0.0035535 |  |  |
| M321T314 | 0.003613 |  |  |
| M539T409 | 0.0036381 |  |  |
| M414T446 | 0.0036938 |  |  |
| M503T275_2 | 0.0037741 |  |  |
| M761T386 | 0.0037943 |  |  |
| M1221T341 | 0.0038025 |  |  |
| M469T333 | 0.0038308 |  |  |
| M219T382 | 0.0038418 |  |  |
| M971T398_1 | 0.0038462 |  |  |
| M1229T318 | 0.0038925 |  |  |
| M371T336 | 0.0039409 |  |  |
| M732T320 | 0.0039887 |  |  |
| M1221T340 | 0.0040455 |  |  |
| M1364T334_1 | 0.0041769 |  |  |
| M540T409 | 0.0042368 |  |  |
| M1291T303_4 | 0.0042499 |  |  |
| M670T448 | 0.0042507 |  |  |
| M300T313 | 0.004349 |  |  |
| M814T341_1 | 0.0044286 |  |  |
| M861T296 | 0.0044635 |  |  |
| M1292T413_2 | 0.0044772 |  |  |
| M521T361 | 0.0045432 |  |  |
| M785T581 | 0.0045603 |  |  |
| M499T321 | 0.0046464 |  |  |
| M536T354 | 0.0046539 |  |  |
| M1291T303_2 | 0.0047667 |  |  |
| M415T347 | 0.0049376 |  |  |
| M169T151 | 0.0049407 |  |  |
| M567T59 | 0.0051753 |  |  |
| M388T336 | 0.0054483 |  |  |
| M738T440 | 0.0054813 |  |  |
| M714T372_1 | 0.005582 |  |  |
| M689T281 | 0.0056543 |  |  |
| M952T434 | 0.0056663 |  |  |
| M1306T345 | 0.0057868 |  |  |
| M464T305 | 0.0058984 |  |  |
| M339T274_1 | 0.0059201 |  |  |
| M181T310 | 0.0059515 |  |  |
| M433T346 | 0.0061419 |  |  |
| M536T277_2 | 0.0064293 |  |  |
| M345T326 | 0.006466 |  |  |
| M451T351 | 0.0064667 |  |  |
| M970T398 | 0.0064722 |  |  |
| M746T67 | 0.006522 |  |  |
| M1291T303_3 | 0.0066384 |  |  |
| M504T361 | 0.0066453 |  |  |
| M907T391_1 | 0.006651 |  |  |
| M522T361 | 0.0066954 |  |  |
| M301T67 | 0.0068669 |  |  |
| M946T331 | 0.0068843 |  |  |
| M1160T324 | 0.0069637 |  |  |
| M372T337 | 0.0069731 |  |  |
| M532T451_2 | 0.0073099 |  |  |
| M476T354 | 0.0073142 |  |  |
| M595T278 | 0.0077428 |  |  |
| M453T589 | 0.0079168 |  |  |
| M974T435_2 | 0.0079882 |  |  |
| M971T343 | 0.0079901 |  |  |
| M430T356 | 0.0081672 |  |  |
| M701T350 | 0.008638 |  |  |
| M72T47 | 0.0087606 |  |  |
| M1160T343 | 0.0088934 |  |  |
| M430T274_1 | 0.0089723 |  |  |
| M1260T329 | 0.0089762 |  |  |
| M1021T311 | 0.0091299 |  |  |
| M565T290 | 0.0092818 |  |  |
| M814T341_2 | 0.0094122 |  |  |
| M329T68 | 0.009481 |  |  |
| M357T275 | 0.0095723 |  |  |
| M731T318 | 0.0095814 |  |  |
| M431T59 | 0.0097695 |  |  |
| M675T376 | 0.0097723 |  |  |
| M301T274 | 0.010026 |  |  |
| M686T378 | 0.010228 |  |  |
| M163T66 | 0.010251 |  |  |
| M375T277_1 | 0.010291 |  |  |
| M1293T398_2 | 0.010301 |  |  |
| M348T65 | 0.010338 |  |  |
| M644T275 | 0.010353 |  |  |
| M910T334_1 | 0.010416 |  |  |
| M603T323 | 0.010426 |  |  |
| M459T278 | 0.010545 |  |  |
| M1161T343 | 0.01065 |  |  |
| M600T379 | 0.010678 |  |  |
| M393T333 | 0.01078 |  |  |
| M227T437 | 0.011073 |  |  |
| M855T460 | 0.011163 |  |  |
| M809T415 | 0.011183 |  |  |
| M477T354 | 0.011339 |  |  |
| M344T326 | 0.011376 |  |  |
| M397T65 | 0.011533 |  |  |
| M952T433 | 0.011545 |  |  |
| M568T66 | 0.011545 |  |  |
| M384T66 | 0.011787 |  |  |
| M458T431 | 0.012075 |  |  |
| M111T309 | 0.012075 |  |  |
| M1013T275 | 0.012231 |  |  |
| M284T314 | 0.012319 |  |  |
| M381T66 | 0.012715 |  |  |
| M971T398_2 | 0.012732 |  |  |
| M513T342 | 0.01275 |  |  |
| M1069T280 | 0.012833 |  |  |
| M1261T326_2 | 0.013109 |  |  |
| M439T275 | 0.013139 |  |  |
| M682T382 | 0.013139 |  |  |
| M1282T396 | 0.013184 |  |  |
| M1290T302 | 0.013359 |  |  |
| M683T383 | 0.013359 |  |  |
| M338T606 | 0.013474 |  |  |
| M909T336 | 0.013474 |  |  |
| M459T354 | 0.013481 |  |  |
| M501T275_2 | 0.013526 |  |  |
| M679T453_2 | 0.013839 |  |  |
| M1206T315_3 | 0.014025 |  |  |
| M1005T276 | 0.014175 |  |  |
| M1032T277 | 0.014187 |  |  |
| M1070T279 | 0.014699 |  |  |
| M239T301 | 0.014725 |  |  |
| M463T306 | 0.01489 |  |  |
| M781T332 | 0.015203 |  |  |
| M195T343 | 0.015243 |  |  |
| M575T658 | 0.015255 |  |  |
| M974T435_1 | 0.015386 |  |  |
| M1291T413_2 | 0.015386 |  |  |
| M912T388_1 | 0.015386 |  |  |
| M440T275 | 0.015415 |  |  |
| M389T276_2 | 0.015533 |  |  |
| M1080T399 | 0.01589 |  |  |
| M719T283_1 | 0.01604 |  |  |
| M536T277_1 | 0.016058 |  |  |
| M912T388_2 | 0.01636 |  |  |
| M453T342 | 0.016394 |  |  |
| M690T279 | 0.016488 |  |  |
| M1229T321 | 0.016488 |  |  |
| M777T378 | 0.016599 |  |  |
| M977T354 | 0.016716 |  |  |
| M746T350 | 0.017223 |  |  |
| M1246T380 | 0.017271 |  |  |
| M320T323 | 0.017642 |  |  |
| M1345T398_2 | 0.018762 |  |  |
| M1011T652 | 0.018875 |  |  |
| M517T274 | 0.019023 |  |  |
| M195T72 | 0.019117 |  |  |
| M1020T311 | 0.019143 |  |  |
| M502T275 | 0.019367 |  |  |
| M630T308 | 0.019795 |  |  |
| M81T661 | 0.019876 |  |  |
| M1299T398 | 0.019913 |  |  |
| M399T46 | 0.020026 |  |  |
| M732T319 | 0.020265 |  |  |
| M619T658 | 0.020461 |  |  |
| M430T399 | 0.020573 |  |  |
| M971T398_4 | 0.020574 |  |  |
| M804T377 | 0.020811 |  |  |
| M718T314 | 0.021126 |  |  |
| M1247T381_1 | 0.021487 |  |  |
| M621T301 | 0.021601 |  |  |
| M965T394_3 | 0.021786 |  |  |
| M345T275 | 0.022069 |  |  |
| M710T301_2 | 0.022075 |  |  |
| M321T323 | 0.02226 |  |  |
| M438T660 | 0.02226 |  |  |
| M159T313 | 0.02226 |  |  |
| M300T275 | 0.022596 |  |  |
| M572T280 | 0.022658 |  |  |
| M641T394 | 0.022985 |  |  |
| M805T377 | 0.023207 |  |  |
| M971T398_3 | 0.023256 |  |  |
| M719T283_2 | 0.023256 |  |  |
| M1033T280 | 0.023478 |  |  |
| M635T277 | 0.023536 |  |  |
| M434T276_2 | 0.023589 |  |  |
| M101T293 | 0.02381 |  |  |
| M486T344 | 0.023924 |  |  |
| M744T344 | 0.023965 |  |  |
| M1382T380 | 0.024003 |  |  |
| M452T274_3 | 0.024333 |  |  |
| M641T396 | 0.024916 |  |  |
| M964T394 | 0.02513 |  |  |
| M828T301_1 | 0.025222 |  |  |
| M700T349 | 0.025702 |  |  |
| M694T317 | 0.026366 |  |  |
| M286T315 | 0.026366 |  |  |
| M747T387 | 0.026552 |  |  |
| M240T301 | 0.027162 |  |  |
| M355T53 | 0.027162 |  |  |
| M690T640 | 0.027184 |  |  |
| M169T175 | 0.027186 |  |  |
| M814T339 | 0.027478 |  |  |
| M129T46 | 0.027496 |  |  |
| M390T536 | 0.027496 |  |  |
| M457T368 | 0.027612 |  |  |
| M642T396_1 | 0.027688 |  |  |
| M85T47 | 0.027919 |  |  |
| M886T431_2 | 0.028344 |  |  |
| M502T276 | 0.028548 |  |  |
| M146T67 | 0.028548 |  |  |
| M353T445 | 0.028784 |  |  |
| M581T343_1 | 0.028882 |  |  |
| M440T312 | 0.028988 |  |  |
| M517T275_2 | 0.029194 |  |  |
| M361T274_1 | 0.029254 |  |  |
| M516T275 | 0.029469 |  |  |
| M789T323 | 0.029773 |  |  |
| M1364T334_2 | 0.029795 |  |  |
| M382T66 | 0.030136 |  |  |
| M377T343 | 0.030219 |  |  |
| M392T331 | 0.030236 |  |  |
| M720T347 | 0.030238 |  |  |
| M435T278 | 0.030349 |  |  |
| M432T345 | 0.030349 |  |  |
| M499T355 | 0.030739 |  |  |
| M478T354 | 0.030739 |  |  |
| M835T373 | 0.031142 |  |  |
| M530T278 | 0.031627 |  |  |
| M689T377 | 0.031657 |  |  |
| M1071T279 | 0.031783 |  |  |
| M582T325 | 0.031869 |  |  |
| M810T415 | 0.031869 |  |  |
| M861T413_3 | 0.031869 |  |  |
| M578T278_1 | 0.032283 |  |  |
| M297T319 | 0.032725 |  |  |
| M1079T274 | 0.032922 |  |  |
| M744T275 | 0.032941 |  |  |
| M511T312 | 0.033019 |  |  |
| M410T337 | 0.033601 |  |  |
| M863T281_2 | 0.033711 |  |  |
| M569T367 | 0.033867 |  |  |
| M361T274_2 | 0.034175 |  |  |
| M1066T389_1 | 0.034535 |  |  |
| M311T60 | 0.035108 |  |  |
| M631T307 | 0.035143 |  |  |
| M716T355 | 0.035806 |  |  |
| M1299T399 | 0.036099 |  |  |
| M575T274_2 | 0.036328 |  |  |
| M831T382_1 | 0.036467 |  |  |
| M512T275 | 0.036542 |  |  |
| M829T580 | 0.037342 |  |  |
| M908T432_2 | 0.037604 |  |  |
| M940T291_2 | 0.03762 |  |  |
| M1397T385_1 | 0.037961 |  |  |
| M366T325 | 0.037988 |  |  |
| M199T47 | 0.037988 |  |  |
| M439T46 | 0.038042 |  |  |
| M1281T396 | 0.038529 |  |  |
| M777T348 | 0.038951 |  |  |
| M627T355 | 0.039001 |  |  |
| M648T277 | 0.039064 |  |  |
| M530T66 | 0.039744 |  |  |
| M112T309 | 0.039854 |  |  |
| M339T274_2 | 0.040004 |  |  |
| M543T67_1 | 0.04001 |  |  |
| M896T278 | 0.040185 |  |  |
| M277T499 | 0.040387 |  |  |
| M806T390 | 0.040718 |  |  |
| M719T314 | 0.040718 |  |  |
| M575T274_1 | 0.040857 |  |  |
| M501T365 | 0.041366 |  |  |
| M805T387 | 0.04142 |  |  |
| M420T274_1 | 0.041427 |  |  |
| M61T61 | 0.041543 |  |  |
| M359T355 | 0.041662 |  |  |
| M729T302 | 0.041679 |  |  |
| M708T440 | 0.041728 |  |  |
| M189T313 | 0.041836 |  |  |
| M922T379 | 0.042082 |  |  |
| M535T277_1 | 0.042317 |  |  |
| M965T394_2 | 0.042349 |  |  |
| M745T275 | 0.042373 |  |  |
| M908T432_1 | 0.043359 |  |  |
| M358T328 | 0.043359 |  |  |
| M633T321 | 0.043699 |  |  |
| M287T315 | 0.04379 |  |  |
| M141T46 | 0.043814 |  |  |
| M526T275 | 0.043897 |  |  |
| M1159T326 | 0.044473 |  |  |
| M584T350 | 0.044508 |  |  |
| M205T314 | 0.044621 |  |  |
| M497T52_2 | 0.044621 |  |  |
| M1135T357 | 0.044621 |  |  |
| M1246T379 | 0.044787 |  |  |
| M255T555 | 0.045028 |  |  |
| M1420T334 | 0.045224 |  |  |
| M591T373 | 0.045722 |  |  |
| M719T351 | 0.045872 |  |  |
| M389T335 | 0.045883 |  |  |
| M534T388_1 | 0.046301 |  |  |
| M1225T332 | 0.046421 |  |  |
| M695T369 | 0.046436 |  |  |
| M718T355 | 0.046436 |  |  |
| M547T367 | 0.046659 |  |  |
| M1310T305_1 | 0.046787 |  |  |
| M551T59 | 0.046857 |  |  |
| M709T328 | 0.046868 |  |  |
| M907T391_2 | 0.047078 |  |  |
| M213T273 | 0.047095 |  |  |
| M195T308 | 0.047095 |  |  |
| M1345T397 | 0.047702 |  |  |
| M712T389_1 | 0.047797 |  |  |
| M1067T389_1 | 0.048005 |  |  |
| M711T389_1 | 0.048096 |  |  |
| M1131T328 | 0.048234 |  |  |
| M811T459 | 0.048234 |  |  |
| M930T433_1 | 0.048438 |  |  |
| M965T394_1 | 0.049059 |  |  |

GC, gastric cancer

| **Table S2: the VIP scores for saliva metabolites between healthy and GC group** | | | |
| --- | --- | --- | --- |
| Positive and Negative mode |  |  |  |
| Karyoplasmic ratio | VIP scores |  |  |
| M127T82 | 18.391 |  |  |
| M740T386 | 13.701 |  |  |
| M58T113 | 11.67 |  |  |
| M742T383 | 11.269 |  |  |
| M230T102 | 7.5321 |  |  |
| M230T122 | 7.3438 |  |  |
| M741T386 | 5.4986 |  |  |
| M535T277_1 | 5.2247 |  |  |
| M62T75 | 4.9528 |  |  |
| M743T383 | 4.8584 |  |  |
| M97T697 | 3.7657 |  |  |
| M618T421 | 3.7485 |  |  |
| M716T355 | 3.6539 |  |  |
| M966T469 | 3.3274 |  |  |
| M476T354 | 3.0467 |  |  |
| M180T246 | 2.9851 |  |  |
| M169T175 | 2.9305 |  |  |
| M149T496 | 2.9271 |  |  |
| M127T62 | 2.8894 |  |  |
| M761T590 | 2.7774 |  |  |
| M432T345 | 2.6104 |  |  |
| M520T361 | 2.5906 |  |  |
| M618T420 | 2.226 |  |  |
| M388T336 | 2.1265 |  |  |
| M486T311 | 1.6653 |  |  |
| M785T581 | 1.6613 |  |  |
| M131T393 | 1.5495 |  |  |
| M361T274_1 | 1.4948 |  |  |
| M742T386 | 1.3989 |  |  |
| M578T278_1 | 1.3679 |  |  |
| M169T151 | 1.3382 |  |  |
| M300T275 | 1.1988 |  |  |
| M97T721 | 1.1886 |  |  |
| M967T497_1 | 1.1852 |  |  |
| M288T120 | 1.1415 |  |  |
| M207T105 | 1.1296 |  |  |
| M618T435_1 | 1.1156 |  |  |
| M966T497 | 1.0737 |  |  |
| M536T277_1 | 1.0529 |  |  |
| M651T350 | 1.0399 |  |  |
| M283T314 | 1.0348 |  |  |
| M114T654 | 1.0149 |  |  |
| M371T336 | 0.97128 |  |  |
| M806T417 | 0.92525 |  |  |
| M744T383 | 0.91929 |  |  |
| M737T318 | 0.89755 |  |  |
| M111T309 | 0.86455 |  |  |
| M207T126 | 0.85927 |  |  |
| M565T290 | 0.85616 |  |  |
| M97T761 | 0.8559 |  |  |
| M502T276 | 0.84967 |  |  |
| M248T698 | 0.83904 |  |  |
| M327T326 | 0.82152 |  |  |
| M165T417 | 0.80448 |  |  |
| M619T334_1 | 0.80271 |  |  |
| M151T244 | 0.77929 |  |  |
| M653T345 | 0.76975 |  |  |
| M970T286 | 0.76358 |  |  |
| M130T225 | 0.75301 |  |  |
| M652T350_1 | 0.75195 |  |  |
| M434T276_2 | 0.74548 |  |  |
| M344T326 | 0.74252 |  |  |
| M762T590 | 0.73428 |  |  |
| M135T189 | 0.6758 |  |  |
| M517T274 | 0.66782 |  |  |
| M1069T280 | 0.65368 |  |  |
| M1067T287 | 0.62579 |  |  |
| M477T354 | 0.62087 |  |  |
| M433T346 | 0.62019 |  |  |
| M231T120 | 0.61981 |  |  |
| M415T347 | 0.6152 |  |  |
| M521T361 | 0.60914 |  |  |
| M1075T284 | 0.59901 |  |  |
| M591T452 | 0.59691 |  |  |
| M967T497_2 | 0.5947 |  |  |
| M60T112 | 0.59231 |  |  |
| M626T453 | 0.59094 |  |  |
| M213T54 | 0.58125 |  |  |
| M635T452 | 0.57948 |  |  |
| M243T345 | 0.56955 |  |  |
| M582T453 | 0.56913 |  |  |
| M305T498 | 0.56487 |  |  |
| M228T120 | 0.56133 |  |  |
| M81T653 | 0.5564 |  |  |
| M654T345_1 | 0.55562 |  |  |
| M146T67 | 0.55525 |  |  |
| M497T351 | 0.54878 |  |  |
| M570T357 | 0.54813 |  |  |
| M840T386 | 0.54737 |  |  |
| M129T654 | 0.54632 |  |  |
| M526T275 | 0.54462 |  |  |
| M375T277_1 | 0.54122 |  |  |
| M818T436 | 0.52308 |  |  |
| M637T382 | 0.50346 |  |  |
| M502T275 | 0.50076 |  |  |
| M601T452 | 0.4882 |  |  |
| M165T399 | 0.48658 |  |  |
| M239T301 | 0.48585 |  |  |
| M718T314 | 0.48254 |  |  |
| M547T451_2 | 0.4805 |  |  |
| M581T343_1 | 0.4779 |  |  |
| M971T286 | 0.47715 |  |  |
| M715T329 | 0.47017 |  |  |
| M1303T350 | 0.4543 |  |  |
| M117T213 | 0.44891 |  |  |
| M689T281 | 0.44672 |  |  |
| M682T452_3 | 0.44553 |  |  |
| M389T335 | 0.43299 |  |  |
| M641T394 | 0.42964 |  |  |
| M648T453 | 0.42707 |  |  |
| M528T382 | 0.42554 |  |  |
| M696T453_2 | 0.40961 |  |  |
| M381T66 | 0.40154 |  |  |
| M487T311 | 0.40137 |  |  |
| M209T105 | 0.39363 |  |  |
| M909T334 | 0.39355 |  |  |
| M1076T285 | 0.39183 |  |  |
| M439T275 | 0.39111 |  |  |
| M374T309 | 0.39095 |  |  |
| M147T141 | 0.39047 |  |  |
| M130T201 | 0.38868 |  |  |
| M1238T332 | 0.38332 |  |  |
| M714T453 | 0.37991 |  |  |
| M1070T279 | 0.37711 |  |  |
| M459T354 | 0.37121 |  |  |
| M315T594 | 0.36999 |  |  |
| M620T452_2 | 0.36996 |  |  |
| M149T524 | 0.36762 |  |  |
| M613T452 | 0.36704 |  |  |
| M618T365 | 0.36663 |  |  |
| M119T417 | 0.36534 |  |  |
| M653T452_1 | 0.35819 |  |  |
| M1068T287 | 0.35785 |  |  |
| M681T387 | 0.35744 |  |  |
| M516T275 | 0.35653 |  |  |
| M572T452 | 0.34854 |  |  |
| M245T246 | 0.34809 |  |  |
| M653T451 | 0.34496 |  |  |
| M646T452 | 0.3409 |  |  |
| M372T383_1 | 0.33777 |  |  |
| M314T324 | 0.3362 |  |  |
| M604T451 | 0.33571 |  |  |
| M585T366 | 0.33468 |  |  |
| M660T453 | 0.33466 |  |  |
| M641T396 | 0.33322 |  |  |
| M197T55 | 0.33149 |  |  |
| M642T452 | 0.33104 |  |  |
| M536T277_2 | 0.32951 |  |  |
| M503T275_1 | 0.32679 |  |  |
| M668T453_1 | 0.32442 |  |  |
| M594T450_2 | 0.32437 |  |  |
| M738T318 | 0.32403 |  |  |
| M658T452_2 | 0.32385 |  |  |
| M629T372 | 0.32371 |  |  |
| M698T354 | 0.32182 |  |  |
| M653T452_2 | 0.32063 |  |  |
| M166T103 | 0.31946 |  |  |
| M675T452_1 | 0.319 |  |  |
| M181T246 | 0.31891 |  |  |
| M628T313 | 0.31646 |  |  |
| M430T274_1 | 0.31567 |  |  |
| M453T342 | 0.31552 |  |  |
| M792T420 | 0.31525 |  |  |
| M129T609 | 0.31379 |  |  |
| M717T451 | 0.31357 |  |  |
| M682T453 | 0.31345 |  |  |
| M541T362 | 0.31239 |  |  |
| M609T451_1 | 0.31213 |  |  |
| M539T409 | 0.31037 |  |  |
| M682T452_1 | 0.31015 |  |  |
| M719T283_1 | 0.30839 |  |  |
| M503T361 | 0.30829 |  |  |
| M740T454_2 | 0.30749 |  |  |
| M682T452_2 | 0.30713 |  |  |
| M147T417 | 0.30622 |  |  |
| M651T452 | 0.30446 |  |  |
| M811T580 | 0.3031 |  |  |
| M592T451 | 0.30077 |  |  |
| M638T451_3 | 0.29942 |  |  |
| M605T436 | 0.29905 |  |  |
| M146T60 | 0.29753 |  |  |
| M704T453_2 | 0.29525 |  |  |
| M909T335 | 0.29373 |  |  |
| M884T356 | 0.29169 |  |  |
| M301T261 | 0.29088 |  |  |
| M101T293 | 0.29067 |  |  |
| M621T451_1 | 0.29047 |  |  |
| M660T452_3 | 0.28927 |  |  |
| M216T540 | 0.28864 |  |  |
| M593T452_2 | 0.28688 |  |  |
| M719T453 | 0.28682 |  |  |
| M579T332 | 0.28573 |  |  |
| M692T453_2 | 0.2851 |  |  |
| M645T452 | 0.28481 |  |  |
| M667T452_2 | 0.28469 |  |  |
| M674T452_2 | 0.2845 |  |  |
| M686T452 | 0.28425 |  |  |
| M670T452 | 0.28327 |  |  |
| M667T451 | 0.2822 |  |  |
| M313T584 | 0.28198 |  |  |
| M599T451 | 0.28154 |  |  |
| M638T451_4 | 0.28073 |  |  |
| M806T452 | 0.2806 |  |  |
| M660T452_1 | 0.28053 |  |  |
| M677T451 | 0.28031 |  |  |
| M624T451_1 | 0.27987 |  |  |
| M390T338 | 0.27936 |  |  |
| M199T47 | 0.27928 |  |  |
| M286T315 | 0.2787 |  |  |
| M631T451_1 | 0.27862 |  |  |
| M1160T343 | 0.27798 |  |  |
| M718T355 | 0.27706 |  |  |
| M675T452_2 | 0.27696 |  |  |
| M633T451 | 0.27644 |  |  |
| M711T453_2 | 0.27637 |  |  |
| M900T336 | 0.27498 |  |  |
| M1164T436 | 0.27444 |  |  |
| M689T453_2 | 0.27381 |  |  |
| M298T287 | 0.27298 |  |  |
| M708T453_2 | 0.27149 |  |  |
| M689T453_1 | 0.27069 |  |  |
| M697T453_1 | 0.27065 |  |  |
| M627T452_2 | 0.27017 |  |  |
| M85T47 | 0.26951 |  |  |
| M638T451_2 | 0.26849 |  |  |
| M886T382 | 0.26803 |  |  |
| M645T451_2 | 0.2677 |  |  |
| M150T496 | 0.26738 |  |  |
| M841T386 | 0.2669 |  |  |
| M808T415 | 0.26657 |  |  |
| M575T274_1 | 0.26588 |  |  |
| M631T451_2 | 0.26511 |  |  |
| M723T454 | 0.26405 |  |  |
| M576T452_2 | 0.263 |  |  |
| M233T60 | 0.25996 |  |  |
| M364T383 | 0.25936 |  |  |
| M166T122 | 0.25719 |  |  |
| M673T377 | 0.25676 |  |  |
| M701T453_1 | 0.25625 |  |  |
| M570T453 | 0.25612 |  |  |
| M839T387 | 0.25536 |  |  |
| M693T453 | 0.25511 |  |  |
| M203T320 | 0.25475 |  |  |
| M623T451_2 | 0.25428 |  |  |
| M369T499 | 0.25387 |  |  |
| M638T452 | 0.25259 |  |  |
| M381T71 | 0.25121 |  |  |
| M679T453_1 | 0.25111 |  |  |
| M770T451 | 0.25089 |  |  |
| M511T312 | 0.25082 |  |  |
| M744T450_3 | 0.24966 |  |  |
| M611T452 | 0.24942 |  |  |
| M649T451_2 | 0.24846 |  |  |
| M668T452 | 0.24832 |  |  |
| M392T331 | 0.24757 |  |  |
| M129T402 | 0.24655 |  |  |
| M662T452 | 0.24574 |  |  |
| M628T451_1 | 0.24536 |  |  |
| M717T382 | 0.24526 |  |  |
| M348T65 | 0.2448 |  |  |
| M705T452 | 0.24456 |  |  |
| M731T318 | 0.24439 |  |  |
| M631T453 | 0.24356 |  |  |
| M582T325 | 0.24259 |  |  |
| M690T453_1 | 0.24205 |  |  |
| M595T453_3 | 0.24197 |  |  |
| M564T452_1 | 0.24119 |  |  |
| M663T451 | 0.23864 |  |  |
| M275T68 | 0.23782 |  |  |
| M495T285 | 0.23739 |  |  |
| M788T452_1 | 0.23735 |  |  |
| M365T322 | 0.23689 |  |  |
| M181T310 | 0.23676 |  |  |
| M797T452_1 | 0.2366 |  |  |
| M587T453_2 | 0.23633 |  |  |
| M779T451 | 0.23633 |  |  |
| M724T116 | 0.23623 |  |  |
| M616T450_3 | 0.23614 |  |  |
| M711T453_1 | 0.23587 |  |  |
| M606T453 | 0.23482 |  |  |
| M538T452 | 0.23468 |  |  |
| M557T452 | 0.23463 |  |  |
| M650T452_2 | 0.23427 |  |  |
| M393T333 | 0.23397 |  |  |
| M129T140 | 0.2335 |  |  |
| M657T452_4 | 0.23326 |  |  |
| M679T453_2 | 0.23274 |  |  |
| M86T47 | 0.23158 |  |  |
| M641T452 | 0.231 |  |  |
| M638T451_1 | 0.23086 |  |  |
| M657T452_3 | 0.23057 |  |  |
| M702T453_2 | 0.22963 |  |  |
| M762T451_1 | 0.22927 |  |  |
| M707T452 | 0.22878 |  |  |
| M459T278 | 0.22811 |  |  |
| M672T452_3 | 0.22807 |  |  |
| M660T452_2 | 0.22727 |  |  |
| M597T453 | 0.22719 |  |  |
| M643T452_1 | 0.22705 |  |  |
| M560T452_3 | 0.22697 |  |  |
| M675T453 | 0.22689 |  |  |
| M659T452_3 | 0.22665 |  |  |
| M613T451_2 | 0.22626 |  |  |
| M284T321 | 0.22566 |  |  |
| M814T453 | 0.22545 |  |  |
| M616T452 | 0.22542 |  |  |
| M608T450 | 0.22508 |  |  |
| M697T452_1 | 0.22461 |  |  |
| M726T320 | 0.22441 |  |  |
| M637T452 | 0.22404 |  |  |
| M753T451_1 | 0.22333 |  |  |
| M624T452 | 0.22309 |  |  |
| M654T345_2 | 0.22253 |  |  |
| M683T453_2 | 0.22243 |  |  |
| M687T288 | 0.22237 |  |  |
| M609T450 | 0.2221 |  |  |
| M300T313 | 0.22204 |  |  |
| M622T451_2 | 0.22118 |  |  |
| M669T583 | 0.22104 |  |  |
| M779T452_2 | 0.22072 |  |  |
| M735T450_2 | 0.22005 |  |  |
| M320T323 | 0.21947 |  |  |
| M659T452_1 | 0.21942 |  |  |
| M1482T386 | 0.21907 |  |  |
| M430T356 | 0.21867 |  |  |
| M630T450 | 0.21853 |  |  |
| M743T386 | 0.21738 |  |  |
| M704T453_1 | 0.21728 |  |  |
| M681T453 | 0.21724 |  |  |
| M467T60 | 0.21687 |  |  |
| M440T312 | 0.21528 |  |  |
| M634T451_1 | 0.21518 |  |  |
| M646T451_1 | 0.21437 |  |  |
| M517T275_2 | 0.21383 |  |  |
| M947T337_2 | 0.21342 |  |  |
| M608T453 | 0.21285 |  |  |
| M612T450_1 | 0.2128 |  |  |
| M1239T333 | 0.21223 |  |  |
| M850T454_1 | 0.2121 |  |  |
| M998T461 | 0.21198 |  |  |
| M614T452_2 | 0.21067 |  |  |
| M663T452 | 0.21019 |  |  |
| M656T452 | 0.20925 |  |  |
| M578T453_2 | 0.20843 |  |  |
| M719T283_2 | 0.20806 |  |  |
| M372T367 | 0.20623 |  |  |
| M704T453_3 | 0.20621 |  |  |
| M666T453 | 0.20548 |  |  |
| M665T452_1 | 0.20545 |  |  |
| M345T274 | 0.20517 |  |  |
| M735T451 | 0.20422 |  |  |
| M451T61 | 0.2037 |  |  |
| M501T275_2 | 0.20269 |  |  |
| M616T450_1 | 0.20252 |  |  |
| M503T450 | 0.20242 |  |  |
| M1165T434 | 0.20227 |  |  |
| M589T453_2 | 0.20227 |  |  |
| M557T327 | 0.20182 |  |  |
| M725T453 | 0.20137 |  |  |
| M732T320 | 0.20106 |  |  |
| M622T453 | 0.20082 |  |  |
| M635T451_1 | 0.20073 |  |  |
| M948T450 | 0.20029 |  |  |
| M657T452_2 | 0.19999 |  |  |
| M947T336 | 0.19898 |  |  |
| M585T453 | 0.19898 |  |  |
| M628T452 | 0.19856 |  |  |
| M599T450_1 | 0.19834 |  |  |
| M619T451_2 | 0.19823 |  |  |
| M604T453_2 | 0.19767 |  |  |
| M565T450 | 0.19711 |  |  |
| M641T454 | 0.19696 |  |  |
| M566T452_1 | 0.19676 |  |  |
| M832T453 | 0.19637 |  |  |
| M1360T341 | 0.19628 |  |  |
| M694T453_2 | 0.1957 |  |  |
| M1003T452_1 | 0.19489 |  |  |
| M1418T343_2 | 0.19457 |  |  |
| M726T454 | 0.19445 |  |  |
| M607T451 | 0.19414 |  |  |
| M1361T341 | 0.19369 |  |  |
| M867T455 | 0.19365 |  |  |
| M896T278 | 0.19322 |  |  |
| M669T452_1 | 0.19315 |  |  |
| M61T61 | 0.19296 |  |  |
| M744T450_2 | 0.19187 |  |  |
| M621T453_2 | 0.19131 |  |  |
| M650T452_1 | 0.19082 |  |  |
| M1360T335 | 0.1907 |  |  |
| M644T451_1 | 0.19022 |  |  |
| M701T453_2 | 0.18954 |  |  |
| M639T451_2 | 0.189 |  |  |
| M859T454 | 0.18864 |  |  |
| M613T451_3 | 0.18857 |  |  |
| M643T454 | 0.18824 |  |  |
| M635T451_2 | 0.18823 |  |  |
| M656T451 | 0.18818 |  |  |
| M338T274_2 | 0.18753 |  |  |
| M719T454 | 0.18744 |  |  |
| M630T308 | 0.18738 |  |  |
| M261T348 | 0.18731 |  |  |
| M594T450_3 | 0.18727 |  |  |
| M346T288 | 0.18705 |  |  |
| M297T275_1 | 0.18678 |  |  |
| M301T274 | 0.18676 |  |  |
| M992T452_1 | 0.18653 |  |  |
| M970T451_1 | 0.18627 |  |  |
| M861T413_3 | 0.18608 |  |  |
| M733T454_2 | 0.18594 |  |  |
| M440T275 | 0.18551 |  |  |
| M744T275 | 0.18544 |  |  |
| M1020T311 | 0.18508 |  |  |
| M494T453 | 0.18468 |  |  |
| M589T451 | 0.18372 |  |  |
| M917T278 | 0.18338 |  |  |
| M644T452 | 0.18297 |  |  |
| M570T452 | 0.1827 |  |  |
| M580T450 | 0.18249 |  |  |
| M814T361 | 0.18218 |  |  |
| M815T453 | 0.18208 |  |  |
| M616T450_2 | 0.18201 |  |  |
| M598T451 | 0.18111 |  |  |
| M736T454 | 0.18085 |  |  |
| M780T383 | 0.18065 |  |  |
| M1483T386 | 0.18004 |  |  |
| M651T451 | 0.18 |  |  |
| M147T608 | 0.17989 |  |  |
| M695T452_2 | 0.17963 |  |  |
| M615T452 | 0.17914 |  |  |
| M636T452_1 | 0.17906 |  |  |
| M478T293 | 0.17887 |  |  |
| M718T450 | 0.1786 |  |  |
| M652T451 | 0.1786 |  |  |
| M638T382 | 0.17844 |  |  |
| M672T452_2 | 0.17834 |  |  |
| M719T314 | 0.17826 |  |  |
| M793T450 | 0.17813 |  |  |
| M672T452_1 | 0.17745 |  |  |
| M1363T335_1 | 0.17703 |  |  |
| M727T450 | 0.177 |  |  |
| M1002T452_2 | 0.17684 |  |  |
| M330T364 | 0.17683 |  |  |
| M614T452_1 | 0.17668 |  |  |
| M258T296 | 0.17657 |  |  |
| M459T452 | 0.17655 |  |  |
| M209T127 | 0.17645 |  |  |
| M704T453_4 | 0.17603 |  |  |
| M549T61 | 0.17546 |  |  |
| M300T363 | 0.17517 |  |  |
| M694T453_1 | 0.17509 |  |  |
| M697T453_2 | 0.17481 |  |  |
| M823T453_2 | 0.17479 |  |  |
| M915T287_2 | 0.17468 |  |  |
| M726T450 | 0.17466 |  |  |
| M753T451_2 | 0.17449 |  |  |
| M617T451 | 0.17379 |  |  |
| M733T454_3 | 0.17356 |  |  |
| M565T61 | 0.17336 |  |  |
| M689T377 | 0.17319 |  |  |
| M700T349 | 0.17295 |  |  |
| M128T156 | 0.17217 |  |  |
| M714T318 | 0.17188 |  |  |
| M610T453_2 | 0.17186 |  |  |
| M595T453_2 | 0.17169 |  |  |
| M369T60_1 | 0.17136 |  |  |
| M619T454 | 0.17121 |  |  |
| M587T452 | 0.17104 |  |  |
| M569T449 | 0.17085 |  |  |
| M671T452_1 | 0.17037 |  |  |
| M562T452 | 0.17016 |  |  |
| M551T451_1 | 0.17015 |  |  |
| M290T118 | 0.17008 |  |  |
| M353T60 | 0.16981 |  |  |
| M767T453 | 0.16961 |  |  |
| M1165T436 | 0.16959 |  |  |
| M537T277 | 0.16929 |  |  |
| M623T451_1 | 0.16921 |  |  |
| M183T176 | 0.16908 |  |  |
| M761T386 | 0.16884 |  |  |
| M1161T343 | 0.1684 |  |  |
| M1001T285 | 0.16831 |  |  |
| M554T451 | 0.16821 |  |  |
| M584T450_2 | 0.16811 |  |  |
| M489T60 | 0.16806 |  |  |
| M602T450 | 0.16783 |  |  |
| M584T452 | 0.16675 |  |  |
| M850T454_2 | 0.16672 |  |  |
| M621T451_2 | 0.16666 |  |  |
| M688T453_2 | 0.16647 |  |  |
| M685T453_2 | 0.16608 |  |  |
| M187T299 | 0.16578 |  |  |
| M709T449_1 | 0.16531 |  |  |
| M654T452_2 | 0.16531 |  |  |
| M372T337 | 0.16479 |  |  |
| M981T451_1 | 0.16455 |  |  |
| M609T453 | 0.16367 |  |  |
| M151T368 | 0.16358 |  |  |
| M360T292 | 0.16324 |  |  |
| M265T452 | 0.16319 |  |  |
| M676T452_2 | 0.16319 |  |  |
| M1035T453 | 0.16308 |  |  |
| M904T449_1 | 0.16306 |  |  |
| M562T124 | 0.16261 |  |  |
| M666T452_1 | 0.16253 |  |  |
| M285T579 | 0.16207 |  |  |
| M644T453 | 0.16141 |  |  |
| M599T453 | 0.1612 |  |  |
| M1036T454 | 0.16095 |  |  |
| M733T454_1 | 0.1609 |  |  |
| M937T450_1 | 0.16083 |  |  |
| M958T451 | 0.16065 |  |  |
| M569T367 | 0.16045 |  |  |
| M723T453 | 0.1602 |  |  |
| M516T452 | 0.15981 |  |  |
| M612T453_2 | 0.15972 |  |  |
| M258T194 | 0.15967 |  |  |
| M959T450 | 0.15951 |  |  |
| M419T583 | 0.15937 |  |  |
| M525T382 | 0.15935 |  |  |
| M244T298 | 0.1592 |  |  |
| M571T356 | 0.15914 |  |  |
| M81T661 | 0.15897 |  |  |
| M508T319 | 0.15863 |  |  |
| M601T451 | 0.15859 |  |  |
| M641T451_2 | 0.15831 |  |  |
| M971T398_1 | 0.15817 |  |  |
| M690T279 | 0.15802 |  |  |
| M587T60 | 0.15791 |  |  |
| M688T453_3 | 0.15791 |  |  |
| M557T324 | 0.1579 |  |  |
| M947T450 | 0.15739 |  |  |
| M581T452_2 | 0.15686 |  |  |
| M712T453_1 | 0.15654 |  |  |
| M679T452_2 | 0.15641 |  |  |
| M965T394_2 | 0.15602 |  |  |
| M682T263 | 0.15596 |  |  |
| M92T188 | 0.15575 |  |  |
| M163T246 | 0.15571 |  |  |
| M518T350 | 0.15527 |  |  |
| M761T451 | 0.15517 |  |  |
| M600T452 | 0.15496 |  |  |
| M664T452 | 0.1549 |  |  |
| M602T453 | 0.15476 |  |  |
| M581T452_3 | 0.15441 |  |  |
| M227T83 | 0.15416 |  |  |
| M579T452 | 0.15407 |  |  |
| M629T451 | 0.15404 |  |  |
| M972T286 | 0.15401 |  |  |
| M435T278 | 0.15397 |  |  |
| M688T453_1 | 0.15394 |  |  |
| M577T449 | 0.15369 |  |  |
| M806T453_1 | 0.15327 |  |  |
| M685T60 | 0.15323 |  |  |
| M616T363 | 0.15285 |  |  |
| M788T452_2 | 0.15281 |  |  |
| M1025T453_1 | 0.15263 |  |  |
| M654T452_1 | 0.1525 |  |  |
| M553T452_1 | 0.15228 |  |  |
| M639T451_1 | 0.15204 |  |  |
| M894T455_1 | 0.15176 |  |  |
| M718T453_2 | 0.15176 |  |  |
| M744T344 | 0.15125 |  |  |
| M619T451_1 | 0.15114 |  |  |
| M603T452 | 0.15112 |  |  |
| M744T450_4 | 0.15098 |  |  |
| M939T318 | 0.15054 |  |  |
| M700T450_1 | 0.15045 |  |  |
| M642T396_1 | 0.15023 |  |  |
| M481T354 | 0.14989 |  |  |
| M1014T452 | 0.14985 |  |  |
| M771T451 | 0.14941 |  |  |
| M643T452_2 | 0.14933 |  |  |
| M1066T389_1 | 0.14925 |  |  |
| M797T452_2 | 0.14897 |  |  |
| M587T453_1 | 0.14883 |  |  |
| M1419T344 | 0.14873 |  |  |
| M545T451 | 0.14854 |  |  |
| M606T451_2 | 0.14854 |  |  |
| M915T449_1 | 0.14836 |  |  |
| M762T454 | 0.14824 |  |  |
| M1025T453_2 | 0.14813 |  |  |
| M572T280 | 0.14788 |  |  |
| M841T454 | 0.14763 |  |  |
| M499T321 | 0.14711 |  |  |
| M824T453_1 | 0.147 |  |  |
| M1261T330 | 0.14693 |  |  |
| M674T452_1 | 0.14678 |  |  |
| M623T453 | 0.14653 |  |  |
| M1013T453_2 | 0.1465 |  |  |
| M679T452_1 | 0.14616 |  |  |
| M745T454_1 | 0.14603 |  |  |
| M687T453_1 | 0.14574 |  |  |
| M463T306 | 0.14573 |  |  |
| M629T452 | 0.14542 |  |  |
| M753T583 | 0.14521 |  |  |
| M587T449 | 0.14521 |  |  |
| M160T540 | 0.1451 |  |  |
| M947T337_1 | 0.14509 |  |  |
| M703T453 | 0.14503 |  |  |
| M695T452_1 | 0.14446 |  |  |
| M991T452_2 | 0.14423 |  |  |
| M553T452_2 | 0.14413 |  |  |
| M631T452 | 0.1441 |  |  |
| M575T274_2 | 0.14394 |  |  |
| M710T454 | 0.14379 |  |  |
| M200T98 | 0.14378 |  |  |
| M626T451 | 0.14358 |  |  |
| M436T74 | 0.14343 |  |  |
| M715T454_2 | 0.14309 |  |  |
| M547T367 | 0.14298 |  |  |
| M805T387 | 0.1429 |  |  |
| M936T450_2 | 0.14252 |  |  |
| M926T450_1 | 0.14243 |  |  |
| M318T329 | 0.14242 |  |  |
| M647T452 | 0.14236 |  |  |
| M574T452 | 0.14232 |  |  |
| M612T453_1 | 0.14191 |  |  |
| M576T453 | 0.14173 |  |  |
| M614T453 | 0.14159 |  |  |
| M812T453 | 0.14091 |  |  |
| M589T453_3 | 0.14087 |  |  |
| M590T449 | 0.14085 |  |  |
| M608T454 | 0.14066 |  |  |
| M912T388_2 | 0.14054 |  |  |
| M892T449 | 0.1401 |  |  |
| M615T450 | 0.13997 |  |  |
| M647T451_1 | 0.13982 |  |  |
| M893T449_1 | 0.13955 |  |  |
| M72T47 | 0.13955 |  |  |
| M767T360 | 0.13952 |  |  |
| M719T351 | 0.13926 |  |  |
| M248T774 | 0.13917 |  |  |
| M1047T453_1 | 0.13894 |  |  |
| M605T450_1 | 0.1389 |  |  |
| M657T452_1 | 0.13877 |  |  |
| M539T451 | 0.13851 |  |  |
| M127T317 | 0.13819 |  |  |
| M938T499 | 0.13816 |  |  |
| M885T455_1 | 0.13798 |  |  |
| M564T452_2 | 0.13773 |  |  |
| M1046T453 | 0.13766 |  |  |
| M342T379 | 0.13723 |  |  |
| M673T452_1 | 0.13711 |  |  |
| M755T454_2 | 0.1367 |  |  |
| M925T450 | 0.1365 |  |  |
| M575T452_2 | 0.13648 |  |  |
| M581T452_1 | 0.1364 |  |  |
| M1219T347_1 | 0.13635 |  |  |
| M694T452 | 0.13621 |  |  |
| M876T455 | 0.13614 |  |  |
| M700T453 | 0.13608 |  |  |
| M698T453_1 | 0.13607 |  |  |
| M1014T453_1 | 0.13601 |  |  |
| M620T452_1 | 0.13538 |  |  |
| M1036T453 | 0.13512 |  |  |
| M709T449_2 | 0.13511 |  |  |
| M708T453_1 | 0.1351 |  |  |
| M560T452_2 | 0.13506 |  |  |
| M849T393 | 0.13493 |  |  |
| M595T278 | 0.13459 |  |  |
| M566T452_2 | 0.13446 |  |  |
| M1418T343_1 | 0.13444 |  |  |
| M558T451 | 0.1344 |  |  |
| M691T449 | 0.13416 |  |  |
| M598T453 | 0.13414 |  |  |
| M1069T454_1 | 0.13391 |  |  |
| M529T383 | 0.1336 |  |  |
| M1363T335_2 | 0.13356 |  |  |
| M583T452_2 | 0.13345 |  |  |
| M284T314 | 0.13331 |  |  |
| M805T452 | 0.1333 |  |  |
| M580T451 | 0.13325 |  |  |
| M780T452_1 | 0.1332 |  |  |
| M1260T331 | 0.13314 |  |  |
| M980T451_2 | 0.13283 |  |  |
| M600T453_1 | 0.13282 |  |  |
| M1024T453_2 | 0.13229 |  |  |
| M637T454 | 0.13217 |  |  |
| M981T451_2 | 0.13131 |  |  |
| M606T450 | 0.13101 |  |  |
| M1057T453_2 | 0.13094 |  |  |
| M1305T345 | 0.13094 |  |  |
| M248T738 | 0.13093 |  |  |
| M656T454 | 0.13092 |  |  |
| M612T450_2 | 0.13049 |  |  |
| M1069T287 | 0.13034 |  |  |
| M748T454_1 | 0.13014 |  |  |
| M575T452_1 | 0.13 |  |  |
| M635T277 | 0.13 |  |  |
| M624T451_2 | 0.12991 |  |  |
| M797T446 | 0.12948 |  |  |
| M372T310 | 0.12918 |  |  |
| M909T336 | 0.12917 |  |  |
| M345T326 | 0.12912 |  |  |
| M165T177 | 0.12858 |  |  |
| M604T453_1 | 0.12828 |  |  |
| M1058T454_1 | 0.12827 |  |  |
| M1159T326 | 0.12792 |  |  |
| M959T451 | 0.12738 |  |  |
| M595T453_1 | 0.12728 |  |  |
| M882T449_1 | 0.12725 |  |  |
| M964T394 | 0.12693 |  |  |
| M666T452_2 | 0.12689 |  |  |
| M948T451 | 0.12688 |  |  |
| M625T454_2 | 0.12683 |  |  |
| M573T453 | 0.1267 |  |  |
| M744T450_1 | 0.12662 |  |  |
| M914T450 | 0.12615 |  |  |
| M625T452 | 0.12613 |  |  |
| M858T455 | 0.12589 |  |  |
| M522T361 | 0.12563 |  |  |
| M589T453_1 | 0.12552 |  |  |
| M903T449 | 0.12552 |  |  |
| M569T452 | 0.12546 |  |  |
| M478T354 | 0.12508 |  |  |
| M741T454_1 | 0.12494 |  |  |
| M700T450_2 | 0.12491 |  |  |
| M547T451_1 | 0.12472 |  |  |
| M796T452 | 0.1247 |  |  |
| M649T452 | 0.12451 |  |  |
| M625T454_1 | 0.12432 |  |  |
| M303T140 | 0.12428 |  |  |
| M746T453 | 0.12411 |  |  |
| M187T190 | 0.12404 |  |  |
| M686T378 | 0.12376 |  |  |
| M358T337 | 0.1237 |  |  |
| M937T499_2 | 0.12366 |  |  |
| M965T394_3 | 0.12314 |  |  |
| M601T124 | 0.123 |  |  |
| M741T453 | 0.12297 |  |  |
| M648T452 | 0.12282 |  |  |
| M1080T454_1 | 0.12251 |  |  |
| M344T292 | 0.12231 |  |  |
| M838T448 | 0.12229 |  |  |
| M749T451 | 0.12215 |  |  |
| M665T452_2 | 0.12215 |  |  |
| M940T291_2 | 0.12186 |  |  |
| M918T279 | 0.12164 |  |  |
| M937T399 | 0.12148 |  |  |
| M188T221 | 0.12138 |  |  |
| M117T417 | 0.12134 |  |  |
| M591T450 | 0.1212 |  |  |
| M747T388 | 0.12111 |  |  |
| M555T451 | 0.12075 |  |  |
| M632T451_1 | 0.12064 |  |  |
| M425T382 | 0.12058 |  |  |
| M1362T334 | 0.11981 |  |  |
| M1079T454 | 0.11968 |  |  |
| M501T365 | 0.11937 |  |  |
| M903T455 | 0.11898 |  |  |
| M598T139 | 0.11851 |  |  |
| M498T357 | 0.11822 |  |  |
| M948T336 | 0.11816 |  |  |
| M1091T455 | 0.11784 |  |  |
| M609T451_2 | 0.11775 |  |  |
| M881T449 | 0.11765 |  |  |
| M992T452_2 | 0.11762 |  |  |
| M321T314 | 0.11743 |  |  |
| M1218T347 | 0.1174 |  |  |
| M316T337 | 0.11686 |  |  |
| M576T351 | 0.11654 |  |  |
| M783T388 | 0.11593 |  |  |
| M1164T421 | 0.11592 |  |  |
| M629T454_2 | 0.11574 |  |  |
| M503T275_2 | 0.11554 |  |  |
| M301T67 | 0.11496 |  |  |
| M605T450_2 | 0.11454 |  |  |
| M619T452 | 0.11451 |  |  |
| M700T449 | 0.11442 |  |  |
| M691T450 | 0.11421 |  |  |
| M758T452 | 0.11412 |  |  |
| M632T451_2 | 0.11396 |  |  |
| M1269T287 | 0.11386 |  |  |
| M735T450_1 | 0.11364 |  |  |
| M691T453 | 0.11347 |  |  |
| M1021T311 | 0.11306 |  |  |
| M622T451_1 | 0.1129 |  |  |
| M833T453 | 0.11251 |  |  |
| M860T448_1 | 0.11242 |  |  |
| M562T450 | 0.11242 |  |  |
| M211T246 | 0.11217 |  |  |
| M1058T454_2 | 0.11199 |  |  |
| M611T326 | 0.11188 |  |  |
| M849T447 | 0.11161 |  |  |
| M762T451_2 | 0.11108 |  |  |
| M187T382 | 0.11083 |  |  |
| M1071T279 | 0.11082 |  |  |
| M339T274_1 | 0.11079 |  |  |
| M670T583 | 0.11065 |  |  |
| M701T452 | 0.11061 |  |  |
| M108T247 | 0.11047 |  |  |
| M785T349 | 0.10999 |  |  |
| M1287T451_1 | 0.10974 |  |  |
| M597T381 | 0.10964 |  |  |
| M532T451_2 | 0.10942 |  |  |
| M630T452 | 0.10935 |  |  |
| M1301T452 | 0.10934 |  |  |
| M85T393 | 0.10906 |  |  |
| M708T315 | 0.10892 |  |  |
| M744T355 | 0.10868 |  |  |
| M970T398 | 0.10845 |  |  |
| M788T451 | 0.10839 |  |  |
| M669T452_2 | 0.10829 |  |  |
| M321T583 | 0.10825 |  |  |
| M684T452 | 0.10815 |  |  |
| M645T451_1 | 0.10796 |  |  |
| M613T451_1 | 0.10713 |  |  |
| M747T454 | 0.10624 |  |  |
| M692T453_1 | 0.10591 |  |  |
| M1272T451_1 | 0.10584 |  |  |
| M859T448 | 0.10583 |  |  |
| M536T354 | 0.10574 |  |  |
| M686T453 | 0.10552 |  |  |
| M300T341 | 0.10541 |  |  |
| M809T415 | 0.10512 |  |  |
| M345T275 | 0.10512 |  |  |
| M691T452 | 0.1051 |  |  |
| M1257T450_3 | 0.10509 |  |  |
| M1213T449_2 | 0.10498 |  |  |
| M629T313 | 0.10495 |  |  |
| M723T387 | 0.10487 |  |  |
| M377T343 | 0.10467 |  |  |
| M1068T454 | 0.10439 |  |  |
| M1291T303_1 | 0.10426 |  |  |
| M644T451_2 | 0.10425 |  |  |
| M1257T450_2 | 0.10396 |  |  |
| M356T393 | 0.10371 |  |  |
| M387T438 | 0.10366 |  |  |
| M753T450 | 0.1036 |  |  |
| M593T452_1 | 0.10319 |  |  |
| M1228T450_2 | 0.10317 |  |  |
| M868T454 | 0.10312 |  |  |
| M831T382_1 | 0.10308 |  |  |
| M619T658 | 0.10298 |  |  |
| M1301T451_2 | 0.10289 |  |  |
| M1003T452_2 | 0.10272 |  |  |
| M971T398_2 | 0.10272 |  |  |
| M1069T454_2 | 0.10236 |  |  |
| M937T450_2 | 0.10231 |  |  |
| M383T247 | 0.10214 |  |  |
| M1198T449_2 | 0.1021 |  |  |
| M568T451 | 0.10195 |  |  |
| M871T448_1 | 0.10183 |  |  |
| M1272T450 | 0.10181 |  |  |
| M823T453_1 | 0.10135 |  |  |
| M815T452 | 0.10116 |  |  |
| M627T452_1 | 0.10112 |  |  |
| M755T455 | 0.10103 |  |  |
| M1011T285 | 0.10097 |  |  |
| M1286T451_2 | 0.10086 |  |  |
| M457T368 | 0.10075 |  |  |
| M926T450_2 | 0.10064 |  |  |
| M1169T448_3 | 0.10052 |  |  |
| M606T451_1 | 0.10036 |  |  |
| M969T348 | 0.099761 |  |  |
| M667T452_1 | 0.099708 |  |  |
| M627T355 | 0.099692 |  |  |
| M970T451_2 | 0.099341 |  |  |
| M1291T303_2 | 0.098552 |  |  |
| M779T452_1 | 0.098517 |  |  |
| M594T450_1 | 0.098492 |  |  |
| M444T312 | 0.098107 |  |  |
| M422T66 | 0.09806 |  |  |
| M887T382 | 0.097879 |  |  |
| M669T452_3 | 0.097876 |  |  |
| M969T451_2 | 0.097562 |  |  |
| M671T324 | 0.097505 |  |  |
| M261T330 | 0.097197 |  |  |
| M1154T448 | 0.097116 |  |  |
| M1160T324 | 0.096958 |  |  |
| M727T313 | 0.096955 |  |  |
| M702T453_1 | 0.096827 |  |  |
| M1246T380 | 0.096419 |  |  |
| M1155T448_1 | 0.09612 |  |  |
| M1238T364 | 0.096044 |  |  |
| M1047T454 | 0.095942 |  |  |
| M758T451 | 0.095941 |  |  |
| M1228T450_1 | 0.095528 |  |  |
| M531T658 | 0.095178 |  |  |
| M597T450 | 0.094875 |  |  |
| M642T451 | 0.09487 |  |  |
| M633T321 | 0.094857 |  |  |
| M1484T386 | 0.094787 |  |  |
| M1184T449_1 | 0.094745 |  |  |
| M894T455_2 | 0.094537 |  |  |
| M1243T450_1 | 0.094436 |  |  |
| M848T448 | 0.09442 |  |  |
| M789T323 | 0.093985 |  |  |
| M591T373 | 0.093562 |  |  |
| M360T383 | 0.093153 |  |  |
| M389T276_2 | 0.092664 |  |  |
| M647T61 | 0.092595 |  |  |
| M288T294 | 0.09255 |  |  |
| M885T455_2 | 0.092546 |  |  |
| M1102T454 | 0.09238 |  |  |
| M375T309 | 0.092258 |  |  |
| M870T448_2 | 0.092101 |  |  |
| M1199T449_1 | 0.091988 |  |  |
| M781T383 | 0.091828 |  |  |
| M952T434 | 0.091814 |  |  |
| M1213T449_3 | 0.091809 |  |  |
| M663T61 | 0.091605 |  |  |
| M683T383 | 0.091336 |  |  |
| M1206T315_2 | 0.09132 |  |  |
| M1002T285 | 0.090954 |  |  |
| M1341T289 | 0.090436 |  |  |
| M1374T372 | 0.090369 |  |  |
| M406T380 | 0.090329 |  |  |
| M916T287 | 0.090309 |  |  |
| M464T305 | 0.090207 |  |  |
| M661T451 | 0.09018 |  |  |
| M842T391 | 0.090011 |  |  |
| M1242T450 | 0.089844 |  |  |
| M876T451 | 0.089612 |  |  |
| M332T287 | 0.089532 |  |  |
| M1184T449_2 | 0.08942 |  |  |
| M783T60 | 0.089167 |  |  |
| M911T456 | 0.089076 |  |  |
| M372T383_2 | 0.089056 |  |  |
| M682T382 | 0.089021 |  |  |
| M376T393 | 0.088615 |  |  |
| M286T339 | 0.088536 |  |  |
| M603T450 | 0.088255 |  |  |
| M1316T452 | 0.088181 |  |  |
| M805T446 | 0.087844 |  |  |
| M1331T452_1 | 0.087761 |  |  |
| M603T323 | 0.087624 |  |  |
| M129T46 | 0.087453 |  |  |
| M1077T285 | 0.087419 |  |  |
| M469T333 | 0.087279 |  |  |
| M974T435_1 | 0.087149 |  |  |
| M405T310 | 0.08688 |  |  |
| M1420T336 | 0.086643 |  |  |
| M837T447_2 | 0.086487 |  |  |
| M1125T447_3 | 0.086218 |  |  |
| M1219T347_2 | 0.085877 |  |  |
| M1294T398_1 | 0.085787 |  |  |
| M1206T315_1 | 0.085743 |  |  |
| M726T225 | 0.085563 |  |  |
| M434T176 | 0.085327 |  |  |
| M540T409 | 0.085307 |  |  |
| M430T399 | 0.085208 |  |  |
| M603T60 | 0.085032 |  |  |
| M1419T343 | 0.084942 |  |  |
| M725T116 | 0.084813 |  |  |
| M1243T450_2 | 0.084787 |  |  |
| M198T587 | 0.08478 |  |  |
| M739T317 | 0.084571 |  |  |
| M952T433 | 0.084449 |  |  |
| M505T60 | 0.084236 |  |  |
| M1169T448_2 | 0.083884 |  |  |
| M1090T455 | 0.083792 |  |  |
| M779T336 | 0.083748 |  |  |
| M473T352 | 0.083736 |  |  |
| M1110T447_2 | 0.083599 |  |  |
| M166T417 | 0.083378 |  |  |
| M269T546 | 0.083162 |  |  |
| M530T278 | 0.083094 |  |  |
| M1272T451_2 | 0.083089 |  |  |
| M504T361 | 0.082741 |  |  |
| M781T332 | 0.082508 |  |  |
| M915T449_2 | 0.082113 |  |  |
| M814T341_1 | 0.082081 |  |  |
| M511T266 | 0.082032 |  |  |
| M1287T451_2 | 0.081978 |  |  |
| M1316T451_2 | 0.081876 |  |  |
| M746T350 | 0.081788 |  |  |
| M1270T288 | 0.081771 |  |  |
| M1113T455 | 0.08177 |  |  |
| M431T59 | 0.081751 |  |  |
| M1013T275 | 0.081688 |  |  |
| M814T341_2 | 0.081219 |  |  |
| M134T119 | 0.08115 |  |  |
| M1375T453 | 0.081084 |  |  |
| M893T449_2 | 0.08081 |  |  |
| M1306T345 | 0.080456 |  |  |
| M679T382 | 0.080346 |  |  |
| M1081T447_2 | 0.080314 |  |  |
| M537T288 | 0.080305 |  |  |
| M815T361 | 0.079903 |  |  |
| M1125T447_2 | 0.079535 |  |  |
| M969T451_1 | 0.07904 |  |  |
| M357T275 | 0.079019 |  |  |
| M1014T453_2 | 0.078871 |  |  |
| M1330T452 | 0.078862 |  |  |
| M701T60 | 0.078776 |  |  |
| M1389T414_2 | 0.078675 |  |  |
| M789T452 | 0.078618 |  |  |
| M1260T329 | 0.078495 |  |  |
| M906T391 | 0.078436 |  |  |
| M886T431_2 | 0.078408 |  |  |
| M882T449_2 | 0.078366 |  |  |
| M414T446 | 0.078063 |  |  |
| M128T59 | 0.078017 |  |  |
| M904T449_2 | 0.077995 |  |  |
| M542T360 | 0.077892 |  |  |
| M1261T323 | 0.077708 |  |  |
| M630T373 | 0.077489 |  |  |
| M1258T450 | 0.077175 |  |  |
| M1345T452_2 | 0.077151 |  |  |
| M746T287 | 0.077073 |  |  |
| M271T582 | 0.077021 |  |  |
| M1080T454_2 | 0.076864 |  |  |
| M1246T379 | 0.076481 |  |  |
| M283T569 | 0.07616 |  |  |
| M195T72 | 0.076132 |  |  |
| M365T383 | 0.075726 |  |  |
| M344T363 | 0.075667 |  |  |
| M826T447_2 | 0.07556 |  |  |
| M653T350 | 0.07474 |  |  |
| M1291T303_3 | 0.074674 |  |  |
| M571T59 | 0.074391 |  |  |
| M912T456 | 0.074145 |  |  |
| M303T534 | 0.073939 |  |  |
| M397T65 | 0.073888 |  |  |
| M1091T454 | 0.073833 |  |  |
| M1345T398_2 | 0.07372 |  |  |
| M1096T447_1 | 0.073604 |  |  |
| M575T658 | 0.073488 |  |  |
| M980T451_1 | 0.073247 |  |  |
| M525T356 | 0.072585 |  |  |
| M1223T285 | 0.072429 |  |  |
| M1316T451_1 | 0.072299 |  |  |
| M1247T381_1 | 0.072288 |  |  |
| M1199T449_2 | 0.072126 |  |  |
| M586T367 | 0.071975 |  |  |
| M914T449 | 0.071917 |  |  |
| M981T451_3 | 0.071569 |  |  |
| M1037T446_1 | 0.071339 |  |  |
| M699T357 | 0.071272 |  |  |
| M346T309 | 0.071267 |  |  |
| M858T320 | 0.071079 |  |  |
| M635T378 | 0.071035 |  |  |
| M938T437 | 0.070635 |  |  |
| M723T59 | 0.070559 |  |  |
| M1360T453 | 0.070481 |  |  |
| M1111T447_1 | 0.070151 |  |  |
| M1096T447_2 | 0.0701 |  |  |
| M1364T334_1 | 0.070036 |  |  |
| M903T450 | 0.069757 |  |  |
| M1188T372 | 0.069494 |  |  |
| M990T285 | 0.069462 |  |  |
| M452T274_3 | 0.069366 |  |  |
| M678T349 | 0.069259 |  |  |
| M543T67_1 | 0.069092 |  |  |
| M991T452_1 | 0.069091 |  |  |
| M1220T341 | 0.068667 |  |  |
| M644T275 | 0.068585 |  |  |
| M936T450_1 | 0.0684 |  |  |
| M821T58 | 0.068264 |  |  |
| M204T424 | 0.068161 |  |  |
| M639T129 | 0.068125 |  |  |
| M425T323 | 0.067844 |  |  |
| M316T594 | 0.067828 |  |  |
| M992T452_3 | 0.06742 |  |  |
| M406T331 | 0.067266 |  |  |
| M486T344 | 0.06687 |  |  |
| M720T347 | 0.06684 |  |  |
| M566T66 | 0.06682 |  |  |
| M1129T289 | 0.066722 |  |  |
| M513T342 | 0.066656 |  |  |
| M1184T448 | 0.066564 |  |  |
| M1221T340 | 0.066459 |  |  |
| M358T328 | 0.066133 |  |  |
| M710T301_2 | 0.066124 |  |  |
| M674T377 | 0.066069 |  |  |
| M732T319 | 0.065914 |  |  |
| M1013T453_1 | 0.065874 |  |  |
| M681T280 | 0.065218 |  |  |
| M907T391_1 | 0.065031 |  |  |
| M553T363 | 0.064873 |  |  |
| M386T65 | 0.064678 |  |  |
| M502T336 | 0.064618 |  |  |
| M971T343 | 0.064579 |  |  |
| M530T66 | 0.064309 |  |  |
| M1079T274 | 0.064178 |  |  |
| M625T59 | 0.063583 |  |  |
| M1290T303 | 0.063475 |  |  |
| M1310T305_2 | 0.063107 |  |  |
| M458T303 | 0.062965 |  |  |
| M1211T348 | 0.062266 |  |  |
| M910T334_1 | 0.062135 |  |  |
| M297T319 | 0.061381 |  |  |
| M1421T334_1 | 0.061011 |  |  |
| M1281T396 | 0.060983 |  |  |
| M412T173 | 0.060886 |  |  |
| M395T61 | 0.060821 |  |  |
| M651T127 | 0.060586 |  |  |
| M383T59 | 0.060174 |  |  |
| M777T348 | 0.060016 |  |  |
| M1312T415_2 | 0.059868 |  |  |
| M714T372_1 | 0.059747 |  |  |
| M112T309 | 0.059627 |  |  |
| M416T397 | 0.059626 |  |  |
| M1390T414 | 0.059352 |  |  |
| M1486T349 | 0.059212 |  |  |
| M925T449 | 0.059139 |  |  |
| M579T329 | 0.058684 |  |  |
| M240T301 | 0.058343 |  |  |
| M1228T449 | 0.058319 |  |  |
| M938T398 | 0.058148 |  |  |
| M227T437 | 0.058132 |  |  |
| M1294T398_2 | 0.058088 |  |  |
| M799T60 | 0.057878 |  |  |
| M359T355 | 0.057533 |  |  |
| M556T176 | 0.057306 |  |  |
| M1005T276 | 0.057027 |  |  |
| M1152T291 | 0.056978 |  |  |
| M410T337 | 0.056816 |  |  |
| M617T362 | 0.056676 |  |  |
| M1261T326_2 | 0.056572 |  |  |
| M609T59 | 0.056538 |  |  |
| M1070T373 | 0.056446 |  |  |
| M433T58 | 0.056322 |  |  |
| M784T388 | 0.056319 |  |  |
| M357T290 | 0.056115 |  |  |
| M544T339 | 0.056106 |  |  |
| M1071T353 | 0.056089 |  |  |
| M1080T399 | 0.055613 |  |  |
| M971T398_3 | 0.055496 |  |  |
| M651T66 | 0.055467 |  |  |
| M1299T377 | 0.055405 |  |  |
| M1032T408 | 0.055076 |  |  |
| M1030T285 | 0.054786 |  |  |
| M670T448 | 0.054694 |  |  |
| M920T330 | 0.054418 |  |  |
| M1268T284 | 0.05414 |  |  |
| M130T300 | 0.053878 |  |  |
| M828T301_1 | 0.053582 |  |  |
| M1229T318 | 0.05355 |  |  |
| M299T570 | 0.053516 |  |  |
| M1291T413_2 | 0.052773 |  |  |
| M1291T303_4 | 0.052693 |  |  |
| M708T440 | 0.052686 |  |  |
| M1485T382 | 0.052481 |  |  |
| M1229T321 | 0.051772 |  |  |
| M599T139 | 0.051582 |  |  |
| M648T277 | 0.051497 |  |  |
| M360T141 | 0.051286 |  |  |
| M805T377 | 0.051104 |  |  |
| M1484T382 | 0.050991 |  |  |
| M1362T341 | 0.050886 |  |  |
| M804T377 | 0.05061 |  |  |
| M1261T326_1 | 0.050606 |  |  |
| M1032T277 | 0.050432 |  |  |
| M806T390 | 0.050389 |  |  |
| M761T60 | 0.050156 |  |  |
| M1135T357 | 0.049899 |  |  |
| M1487T349 | 0.049317 |  |  |
| M277T499 | 0.04914 |  |  |
| M136T63 | 0.048831 |  |  |
| M559T67 | 0.048648 |  |  |
| M195T308 | 0.048566 |  |  |
| M399T496 | 0.0484 |  |  |
| M459T137 | 0.048382 |  |  |
| M1003T285 | 0.0483 |  |  |
| M1224T286 | 0.048298 |  |  |
| M1389T414_1 | 0.048155 |  |  |
| M812T67 | 0.047735 |  |  |
| M747T387 | 0.047609 |  |  |
| M382T66 | 0.046721 |  |  |
| M1206T315_3 | 0.046712 |  |  |
| M946T331 | 0.0467 |  |  |
| M1035T285 | 0.046633 |  |  |
| M102T60 | 0.046582 |  |  |
| M600T379 | 0.046542 |  |  |
| M1313T416_1 | 0.046494 |  |  |
| M1491T391 | 0.04616 |  |  |
| M814T339 | 0.04503 |  |  |
| M1072T284 | 0.044975 |  |  |
| M314T584 | 0.043861 |  |  |
| M1282T396 | 0.043747 |  |  |
| M577T351 | 0.042814 |  |  |
| M267T176 | 0.042513 |  |  |
| M1390T415 | 0.042373 |  |  |
| M1147T284 | 0.042047 |  |  |
| M783T329 | 0.041577 |  |  |
| M223T320 | 0.041258 |  |  |
| M639T381 | 0.040536 |  |  |
| M747T287 | 0.040399 |  |  |
| M343T576 | 0.039671 |  |  |
| M1490T391 | 0.039288 |  |  |
| M312T432 | 0.03893 |  |  |
| M1342T289 | 0.038587 |  |  |
| M366T325 | 0.037931 |  |  |
| M1397T385_1 | 0.03777 |  |  |
| M948T337 | 0.037723 |  |  |
| M163T66 | 0.037455 |  |  |
| M1299T398 | 0.037287 |  |  |
| M629T311 | 0.037283 |  |  |
| M499T355 | 0.037086 |  |  |
| M1293T398_2 | 0.03681 |  |  |
| M286T548 | 0.036437 |  |  |
| M797T370 | 0.036132 |  |  |
| M977T354 | 0.035776 |  |  |
| M744T386 | 0.035654 |  |  |
| M738T386 | 0.035568 |  |  |
| M563T123 | 0.035377 |  |  |
| M922T379 | 0.035262 |  |  |
| M575T66 | 0.034138 |  |  |
| M816T360 | 0.034091 |  |  |
| M1420T334 | 0.0332 |  |  |
| M1072T353 | 0.032824 |  |  |
| M1382T380 | 0.032352 |  |  |
| M311T60 | 0.03204 |  |  |
| M1300T378 | 0.031965 |  |  |
| M1420T345 | 0.031851 |  |  |
| M1259T338 | 0.031747 |  |  |
| M875T291 | 0.031409 |  |  |
| M1299T399 | 0.030309 |  |  |
| M219T382 | 0.029985 |  |  |
| M255T555 | 0.029354 |  |  |
| M971T398_4 | 0.02839 |  |  |
| M695T369 | 0.028098 |  |  |
| M709T328 | 0.026761 |  |  |
| M1078T285 | 0.026707 |  |  |
| M905T394_1 | 0.026277 |  |  |
| M904T394 | 0.026241 |  |  |
| M193T550 | 0.024385 |  |  |
| M835T373 | 0.024095 |  |  |
| M907T391_2 | 0.02244 |  |  |
| M784T402 | 0.012669 |  |  |

VIP, Variable Importance in Projection. GC, gastric cancer

| **Table S3: The collinearity for saliva metabolites between healthy and GC group** | |
| --- | --- |
| Metabolite | VIF |
| M127T82 | 2.857 |
| M230T102 | 2.6 |
| M180T246 | 1.464 |
| M62T75 | 1.144 |
| M58T113 | 2.374 |
| M127T62 | 2.826 |
| M761T590 | 1.181 |
| M618T421 | 1.182 |

VIF, Variance Inflation Factor. GC, gastric cancer

| **Table S4: The t test results of saliva metabolites between GC and postoperative group** | | | |
| --- | --- | --- | --- |
| Positive mode |  | Negative model |  |
| Karyoplasmic ratio | P value | Karyoplasmic ratio | P value |
| M992T452_1 | 1.78E-12 | M257T212 | 1.47E-07 |
| M1316T451_1 | 1.78E-12 | M187T110 | 1.47E-07 |
| M981T451_1 | 9.31E-12 | M186T110 | 1.47E-07 |
| M991T452_2 | 9.31E-12 | M113T461 | 9.83E-07 |
| M867T579 | 9.31E-12 | M183T461 | 1.51E-06 |
| M1228T450_2 | 9.31E-12 | M117T213 | 3.00E-06 |
| M1003T452_2 | 9.31E-12 | M259T212 | 5.65E-06 |
| M914T450 | 1.34E-11 | M1427T399 | 8.16E-06 |
| M948T450 | 1.48E-11 | M273T212 | 8.69E-06 |
| M947T450 | 1.48E-11 | M165T177 | 1.05E-05 |
| M881T449 | 1.57E-11 | M1131T360 | 1.05E-05 |
| M936T450_1 | 1.69E-11 | M703T114 | 1.28E-05 |
| M925T450 | 1.84E-11 | M227T83 | 1.73E-05 |
| M937T450_1 | 1.93E-11 | M89T112 | 1.76E-05 |
| M1003T452_1 | 1.93E-11 | M1034T363 | 2.11E-05 |
| M1013T453_2 | 1.93E-11 | M267T176 | 2.11E-05 |
| M959T450 | 1.93E-11 | M701T115 | 2.50E-05 |
| M1330T452 | 2.08E-11 | M781T436 | 2.50E-05 |
| M915T449_2 | 2.09E-11 | M735T339_1 | 2.50E-05 |
| M1025T453_2 | 2.36E-11 | M702T114 | 2.53E-05 |
| M1002T452_2 | 2.66E-11 | M758T377 | 2.94E-05 |
| M893T449_1 | 2.68E-11 | M729T115 | 2.97E-05 |
| M926T450_1 | 2.89E-11 | M288T212 | 3.33E-05 |
| M859T448 | 2.89E-11 | M1203T373_2 | 4.13E-05 |
| M1025T453_1 | 2.89E-11 | M605T219 | 4.22E-05 |
| M892T449 | 3.30E-11 | M1129T360_2 | 4.27E-05 |
| M992T452_2 | 3.83E-11 | M652T350_2 | 4.27E-05 |
| M915T449_1 | 3.83E-11 | M1085T363 | 4.27E-05 |
| M1302T451 | 3.83E-11 | M928T388_1 | 4.28E-05 |
| M1184T449_1 | 3.83E-11 | M1204T373 | 4.80E-05 |
| M1057T453_2 | 4.21E-11 | M1202T372 | 5.05E-05 |
| M1213T449_3 | 5.27E-11 | M1085T360 | 6.17E-05 |
| M1287T451_1 | 5.27E-11 | M1126T350 | 6.67E-05 |
| M936T450_2 | 5.57E-11 | M757T377 | 6.67E-05 |
| M1242T450 | 5.62E-11 | M927T387 | 6.67E-05 |
| M1360T453 | 5.62E-11 | M289T211 | 6.86E-05 |
| M1272T450 | 6.33E-11 | M1130T360 | 6.95E-05 |
| M1069T454_1 | 6.45E-11 | M927T388 | 6.95E-05 |
| M926T450_2 | 7.04E-11 | M409T276 | 7.54E-05 |
| M281T580 | 9.35E-11 | M829T115 | 7.83E-05 |
| M1046T453 | 1.03E-10 | M835T369 | 8.65E-05 |
| M876T455 | 1.04E-10 | M825T436 | 8.65E-05 |
| M904T449_2 | 1.09E-10 | M1129T360_1 | 8.92E-05 |
| M1080T454_1 | 1.10E-10 | M1034T364 | 8.92E-05 |
| M1155T448_1 | 1.11E-10 | M702T67 | 8.93E-05 |
| M981T451_3 | 1.11E-10 | M1113T290 | 9.00E-05 |
| M937T450_2 | 1.12E-10 | M926T387 | 9.37E-05 |
| M980T451_2 | 1.17E-10 | M73T213 | 9.37E-05 |
| M826T447_2 | 1.22E-10 | M714T403 | 9.43E-05 |
| M1014T452 | 1.24E-10 | M894T355 | 9.80E-05 |
| M1287T451_2 | 1.29E-10 | M1203T373_1 | 0.00010261 |
| M992T452_3 | 1.29E-10 | M444T63 | 0.00010604 |
| M848T448 | 1.29E-10 | M1016T359 | 0.00010969 |
| M1035T453 | 1.38E-10 | M1043T401 | 0.00012506 |
| M574T452 | 1.40E-10 | M701T67 | 0.00012506 |
| M870T448_2 | 1.49E-10 | M383T247 | 0.00012506 |
| M1091T454 | 1.58E-10 | M1114T290 | 0.00012506 |
| M1199T449_2 | 1.58E-10 | M538T421 | 0.00012506 |
| M867T455 | 1.67E-10 | M413T62 | 0.00012536 |
| M885T455_2 | 1.73E-10 | M565T113 | 0.00012536 |
| M860T448_2 | 1.80E-10 | M897T404 | 0.00013303 |
| M980T451_1 | 1.83E-10 | M703T67 | 0.00013379 |
| M903T449 | 1.83E-10 | M841T386 | 0.00013676 |
| M1375T453 | 1.86E-10 | M973T451 | 0.00013676 |
| M858T455 | 1.87E-10 | M840T386 | 0.00013676 |
| M1140T448_1 | 1.87E-10 | M593T361 | 0.00013992 |
| M904T449_1 | 2.04E-10 | M451T61 | 0.00014229 |
| M1331T452_1 | 2.12E-10 | M409T234 | 0.0001462 |
| M832T453 | 2.13E-10 | M1204T372 | 0.0001462 |
| M903T455 | 2.18E-10 | M127T82 | 0.0001462 |
| M1213T449_2 | 2.25E-10 | M90T111 | 0.00015194 |
| M1047T454 | 2.26E-10 | M1100T298 | 0.00015411 |
| M850T454_1 | 2.30E-10 | M1242T392 | 0.00016811 |
| M846T579 | 2.34E-10 | M811T114 | 0.00016902 |
| M1198T449_2 | 2.37E-10 | M1134T287 | 0.00017793 |
| M648T452 | 2.57E-10 | M685T60 | 0.00019748 |
| M882T449_1 | 2.83E-10 | M1202T374 | 0.00020068 |
| M841T454 | 3.11E-10 | M549T61 | 0.00021506 |
| M779T451 | 3.37E-10 | M315T61 | 0.00021937 |
| M885T454 | 3.53E-10 | M1262T287 | 0.00021937 |
| M894T455_1 | 3.66E-10 | M805T57 | 0.00024936 |
| M1091T455 | 3.70E-10 | M1184T366 | 0.00025071 |
| M416T579 | 3.88E-10 | M539T421 | 0.00025071 |
| M1184T449_2 | 4.13E-10 | M798T430 | 0.00025539 |
| M1301T451_2 | 4.16E-10 | M557T284 | 0.00026071 |
| M1154T448 | 4.25E-10 | M647T61 | 0.00026543 |
| M806T452 | 4.37E-10 | M1404T375 | 0.00028491 |
| M815T453 | 4.65E-10 | M1242T499 | 0.00028917 |
| M1024T453_2 | 4.94E-10 | M1243T392 | 0.00028917 |
| M581T452_2 | 5.10E-10 | M1084T362 | 0.0002936 |
| M779T452_1 | 5.21E-10 | M826T436 | 0.0002998 |
| M871T448_1 | 5.30E-10 | M1106T368 | 0.00030273 |
| M849T447 | 5.30E-10 | M1398T420 | 0.00031996 |
| M814T453 | 5.36E-10 | M883T387 | 0.00032484 |
| M1037T446_1 | 5.36E-10 | M133T90 | 0.00032746 |
| M642T451 | 5.36E-10 | M547T388 | 0.00032873 |
| M1243T450_1 | 5.36E-10 | M587T60 | 0.00034557 |
| M1345T452_2 | 5.36E-10 | M1403T375 | 0.00034893 |
| M806T453_1 | 5.36E-10 | M1263T288 | 0.00035133 |
| M885T455_1 | 5.53E-10 | M1242T500 | 0.00035381 |
| M1272T451_1 | 6.15E-10 | M687T440 | 0.00035381 |
| M860T448_1 | 6.19E-10 | M837T110 | 0.00035381 |
| M690T640 | 6.35E-10 | M783T60 | 0.00036033 |
| M911T456 | 6.56E-10 | M756T114 | 0.00036098 |
| M788T452_1 | 6.56E-10 | M784T285 | 0.00037332 |
| M838T448 | 6.70E-10 | M458T303 | 0.00037332 |
| M868T579 | 6.80E-10 | M755T114 | 0.00037332 |
| M893T449_2 | 7.15E-10 | M346T309 | 0.00037332 |
| M1258T450 | 7.20E-10 | M1183T366 | 0.00037675 |
| M1169T448_3 | 7.20E-10 | M669T60 | 0.00039201 |
| M859T454 | 7.78E-10 | M1107T368 | 0.00039547 |
| M606T451_1 | 8.26E-10 | M1112T289 | 0.00039576 |
| M1228T450_1 | 8.26E-10 | M757T114 | 0.0004096 |
| M1081T447_3 | 8.62E-10 | M353T60 | 0.0004096 |
| M1014T453_1 | 8.66E-10 | M859T336 | 0.0004309 |
| M848T579 | 9.28E-10 | M1033T363 | 0.00044056 |
| M1257T450_2 | 1.02E-09 | M1417T340_2 | 0.00044099 |
| M1316T452 | 1.04E-09 | M893T355 | 0.00044751 |
| M833T453 | 1.04E-09 | M233T60 | 0.00044751 |
| M823T453_2 | 1.16E-09 | M840T317 | 0.00044751 |
| M753T451_1 | 1.20E-09 | M301T261 | 0.00045464 |
| M850T454_2 | 1.27E-09 | M158T130 | 0.0004641 |
| M417T579 | 1.58E-09 | M344T363 | 0.0004641 |
| M762T451_1 | 1.77E-09 | M462T290 | 0.00049286 |
| M453T579 | 1.85E-09 | M670T583 | 0.0004975 |
| M882T449_2 | 1.93E-09 | M167T176 | 0.00050711 |
| M744T450_2 | 1.96E-09 | M1399T420_2 | 0.00052114 |
| M1068T454 | 2.06E-09 | M1358T364 | 0.0005224 |
| M1125T447_2 | 2.11E-09 | M735T374_1 | 0.00056597 |
| M1047T453_1 | 2.13E-09 | M1135T287 | 0.00056597 |
| M1090T455 | 2.13E-09 | M718T354 | 0.00056743 |
| M868T454 | 2.18E-09 | M1416T340_2 | 0.00057289 |
| M824T453_1 | 2.18E-09 | M331T61 | 0.00057289 |
| M894T455_2 | 2.23E-09 | M812T114 | 0.00058098 |
| M1125T447_3 | 2.25E-09 | M1359T364_2 | 0.00058098 |
| M1113T455 | 2.29E-09 | M867T113 | 0.0005851 |
| M823T453_1 | 2.35E-09 | M686T440 | 0.00058715 |
| M981T451_2 | 2.35E-09 | M1443T341_1 | 0.00058722 |
| M630T450 | 2.47E-09 | M1005T288 | 0.00061226 |
| M847T579 | 2.47E-09 | M335T177 | 0.00061306 |
| M735T450_2 | 2.47E-09 | M124T177 | 0.00061362 |
| M758T452 | 2.56E-09 | M531T189 | 0.00063402 |
| M1110T447_2 | 2.77E-09 | M195T62 | 0.00064718 |
| M912T456 | 2.77E-09 | M711T123 | 0.00065352 |
| M415T565 | 2.78E-09 | M858T320 | 0.00065408 |
| M793T447 | 2.89E-09 | M879T304 | 0.00066963 |
| M1286T451_2 | 2.90E-09 | M1358T363 | 0.00068212 |
| M603T450 | 2.99E-09 | M866T350 | 0.00068666 |
| M432T579 | 3.03E-09 | M217T61 | 0.00069597 |
| M1096T447_1 | 3.18E-09 | M265T51 | 0.00069751 |
| M1079T454 | 3.31E-09 | M357T176 | 0.00069751 |
| M1301T452 | 3.32E-09 | M211T246 | 0.0007041 |
| M711T453_1 | 3.44E-09 | M406T380 | 0.00072894 |
| M744T450_3 | 3.44E-09 | M381T71 | 0.00072995 |
| M770T451 | 3.52E-09 | M1242T436 | 0.00073344 |
| M612T453_1 | 3.77E-09 | M223T320 | 0.00073344 |
| M295T579 | 3.77E-09 | M1417T340_1 | 0.00073429 |
| M593T452_1 | 4.64E-09 | M669T583 | 0.00074138 |
| M619T454 | 4.67E-09 | M653T50 | 0.00074138 |
| M674T452_2 | 4.92E-09 | M371T362 | 0.00076791 |
| M1080T454_2 | 5.07E-09 | M670T165 | 0.00076877 |
| M704T453_1 | 5.10E-09 | M124T156 | 0.00076877 |
| M652T451 | 5.36E-09 | M728T115 | 0.00076877 |
| M755T454_1 | 5.67E-09 | M1242T430 | 0.00077749 |
| M779T452_2 | 5.83E-09 | M115T90 | 0.00078887 |
| M568T451 | 5.86E-09 | M298T287 | 0.00078887 |
| M632T451_1 | 6.01E-09 | M813T126 | 0.00078887 |
| M970T451_1 | 6.18E-09 | M317T75 | 0.00078887 |
| M708T453_1 | 6.20E-09 | M880T304 | 0.00078887 |
| M771T451 | 6.74E-09 | M1417T340_3 | 0.00078887 |
| M876T451 | 6.74E-09 | M865T350 | 0.00081188 |
| M454T579 | 6.82E-09 | M211T282 | 0.00082289 |
| M789T452 | 7.18E-09 | M1360T364 | 0.00084326 |
| M740T454_2 | 7.23E-09 | M821T58 | 0.00084549 |
| M415T579 | 7.25E-09 | M1242T669_1 | 0.00084549 |
| M1257T450_3 | 7.46E-09 | M1016T297 | 0.00084549 |
| M654T452_1 | 7.46E-09 | M1190T287 | 0.00084549 |
| M753T451_2 | 7.53E-09 | M778T386 | 0.00084549 |
| M709T449_1 | 7.74E-09 | M1244T421 | 0.00084549 |
| M667T452_2 | 8.22E-09 | M1436T341_1 | 0.00084549 |
| M638T451_1 | 8.35E-09 | M665T124 | 0.00084598 |
| M638T452 | 8.35E-09 | M1243T669_2 | 0.00084598 |
| M689T453_1 | 8.49E-09 | M354T462 | 0.0008481 |
| M645T451_2 | 8.88E-09 | M191T169 | 0.00085896 |
| M675T452_1 | 9.27E-09 | M132T58 | 0.00086978 |
| M686T453 | 9.27E-09 | M857T359 | 0.00086978 |
| M1316T451_2 | 9.38E-09 | M209T127 | 0.00086978 |
| M735T451 | 9.45E-09 | M1239T333 | 0.00087614 |
| M649T452 | 9.78E-09 | M911T422 | 0.000919 |
| M682T452_1 | 1.00E-08 | M1398T419 | 0.00096927 |
| M959T451 | 1.02E-08 | M357T366 | 0.00097429 |
| M733T454_1 | 1.02E-08 | M1243T435_2 | 0.00097429 |
| M914T449 | 1.02E-08 | M666T124 | 0.00097429 |
| M1199T449_1 | 1.05E-08 | M60T112 | 0.00098339 |
| M1058T454_2 | 1.17E-08 | M613T583 | 0.00098858 |
| M555T451 | 1.21E-08 | M462T309 | 0.00098858 |
| M837T447_2 | 1.24E-08 | M1434T341_1 | 0.00099812 |
| M1014T453_2 | 1.29E-08 | M476T285 | 0.0009986 |
| M700T450_1 | 1.38E-08 | M1369T377_1 | 0.0010149 |
| M660T452_1 | 1.38E-08 | M1216T391 | 0.0010149 |
| M581T452_1 | 1.40E-08 | M1368T376_2 | 0.0010203 |
| M416T565 | 1.47E-08 | M1015T358 | 0.0010472 |
| M762T451_2 | 1.47E-08 | M293T62 | 0.0010517 |
| M709T449_2 | 1.60E-08 | M489T60 | 0.001074 |
| M820T428_2 | 1.60E-08 | M1326T373 | 0.0010876 |
| M744T450_1 | 1.64E-08 | M429T62 | 0.0010876 |
| M679T453_1 | 1.66E-08 | M1282T398 | 0.0010876 |
| M733T454_2 | 1.66E-08 | M1359T364_1 | 0.0010966 |
| M727T450 | 1.66E-08 | M493T306 | 0.0011146 |
| M672T452_1 | 1.67E-08 | M399T535 | 0.0011146 |
| M991T452_1 | 1.67E-08 | M614T583 | 0.0011146 |
| M704T453_2 | 1.67E-08 | M209T105 | 0.0011491 |
| M682T453 | 1.73E-08 | M177T62 | 0.0011956 |
| M842T429_1 | 1.73E-08 | M422T334 | 0.0011956 |
| M676T452_2 | 1.76E-08 | M1243T669_1 | 0.0012089 |
| M726T454 | 1.76E-08 | M231T120 | 0.001225 |
| M761T451 | 1.82E-08 | M1445T341_1 | 0.0012281 |
| M797T452_1 | 1.83E-08 | M242T120 | 0.0012281 |
| M625T454_2 | 1.83E-08 | M527T62 | 0.0012281 |
| M958T451 | 1.84E-08 | M1086T362 | 0.0012281 |
| M632T451_2 | 1.91E-08 | M526T204 | 0.0012281 |
| M755T455 | 2.15E-08 | M840T124 | 0.0012368 |
| M581T452_3 | 2.29E-08 | M986T288 | 0.0012373 |
| M412T588 | 2.41E-08 | M707T59 | 0.001238 |
| M700T450_2 | 2.49E-08 | M1242T669_2 | 0.0012387 |
| M667T451 | 2.49E-08 | M1368T376_1 | 0.0012387 |
| M637T454 | 2.54E-08 | M565T61 | 0.0012541 |
| M657T452_1 | 2.60E-08 | M585T51 | 0.0012541 |
| M708T453_2 | 2.60E-08 | M954T499 | 0.0012911 |
| M1036T453 | 2.64E-08 | M518T291 | 0.0012939 |
| M780T452_1 | 2.71E-08 | M715T402 | 0.0012977 |
| M637T452 | 2.74E-08 | M865T67 | 0.001303 |
| M726T450 | 2.80E-08 | M1183T365 | 0.0013187 |
| M796T452 | 2.80E-08 | M1244T384_1 | 0.0013202 |
| M653T451 | 2.88E-08 | M952T356 | 0.0013202 |
| M689T453_2 | 2.92E-08 | M1351T67 | 0.0013871 |
| M948T451 | 3.04E-08 | M914T366_1 | 0.0013887 |
| M624T452 | 3.07E-08 | M1226T286 | 0.0013889 |
| M805T446 | 3.09E-08 | M1443T341_3 | 0.0013889 |
| M649T451_2 | 3.16E-08 | M951T361_1 | 0.0014007 |
| M575T452_1 | 3.16E-08 | M734T374 | 0.0014007 |
| M644T451_2 | 3.16E-08 | M1444T341_1 | 0.0014208 |
| M691T449 | 3.16E-08 | M1399T420_1 | 0.0014234 |
| M1169T448_2 | 3.16E-08 | M1243T435_1 | 0.0014427 |
| M1243T450_2 | 3.26E-08 | M318T287 | 0.0014464 |
| M718T450 | 3.32E-08 | M527T387 | 0.0014515 |
| M645T451_1 | 3.39E-08 | M63T61 | 0.0014515 |
| M616T450_1 | 3.52E-08 | M349T52 | 0.0014515 |
| M1102T454 | 3.62E-08 | M566T342_1 | 0.0014515 |
| M627T452_2 | 3.65E-08 | M666T321 | 0.0014515 |
| M613T451_2 | 3.71E-08 | M737T50 | 0.0014515 |
| M600T642 | 3.71E-08 | M147T654 | 0.0014524 |
| M397T579 | 3.73E-08 | M1279T398 | 0.0014524 |
| M351T589 | 3.80E-08 | M892T436_1 | 0.0014602 |
| M748T454_1 | 4.10E-08 | M974T458 | 0.0014602 |
| M793T450 | 4.10E-08 | M388T290 | 0.0014818 |
| M741T453 | 4.11E-08 | M567T287 | 0.0014818 |
| M654T452_2 | 4.12E-08 | M462T324 | 0.0015066 |
| M601T451 | 4.12E-08 | M1434T341_2 | 0.0015336 |
| M681T453 | 4.14E-08 | M130T225 | 0.0015336 |
| M601T642 | 4.14E-08 | M1244T384_2 | 0.0015409 |
| M815T452 | 4.36E-08 | M168T176 | 0.0015443 |
| M755T454_2 | 4.37E-08 | M199T60 | 0.0015443 |
| M1069T454_2 | 4.38E-08 | M107T367 | 0.001557 |
| M588T452 | 4.60E-08 | M360T383 | 0.001557 |
| M388T575 | 4.65E-08 | M1443T341_2 | 0.0015713 |
| M805T452 | 4.68E-08 | M1444T341_3 | 0.0015715 |
| M657T452_2 | 4.69E-08 | M995T284 | 0.0015918 |
| M1272T451_2 | 4.71E-08 | M651T350 | 0.0015966 |
| M455T579 | 5.04E-08 | M598T282 | 0.001611 |
| M623T451_1 | 5.04E-08 | M892T436_2 | 0.001611 |
| M307T589 | 5.45E-08 | M565T96 | 0.0016407 |
| M698T453_1 | 5.85E-08 | M1279T302 | 0.0016407 |
| M625T452 | 6.38E-08 | M607T680 | 0.0016532 |
| M797T427 | 6.45E-08 | M968T498 | 0.0016562 |
| M691T450 | 6.48E-08 | M888T355_2 | 0.0016674 |
| M635T451_2 | 6.48E-08 | M569T51 | 0.001675 |
| M777T637 | 6.48E-08 | M1444T341_2 | 0.001675 |
| M735T450_1 | 6.57E-08 | M1281T302 | 0.0017071 |
| M600T452 | 6.70E-08 | M288T294 | 0.0017236 |
| M969T669_2 | 7.17E-08 | M79T61_2 | 0.0017236 |
| M679T452_1 | 7.17E-08 | M1245T384_2 | 0.0017257 |
| M659T452_1 | 7.17E-08 | M533T61 | 0.0017325 |
| M608T450 | 7.66E-08 | M800T350 | 0.0017325 |
| M564T452_2 | 7.66E-08 | M415T107 | 0.0017601 |
| M621T453_2 | 7.81E-08 | M1435T341_3 | 0.0017605 |
| M1081T447_2 | 8.26E-08 | M606T681 | 0.0017701 |
| M589T453_1 | 8.55E-08 | M637T355 | 0.0017757 |
| M864T430_1 | 8.76E-08 | M1026T404 | 0.0018129 |
| M723T453 | 8.82E-08 | M814T125 | 0.001819 |
| M587T453_1 | 8.82E-08 | M366T294 | 0.001819 |
| M775T425 | 9.12E-08 | M1304T380_2 | 0.001819 |
| M645T452 | 1.00E-07 | M964T286 | 0.0018216 |
| M659T452_3 | 1.00E-07 | M300T341 | 0.0018406 |
| M609T453 | 1.04E-07 | M1243T422 | 0.0018406 |
| M694T453_1 | 1.05E-07 | M866T67 | 0.0018406 |
| M1058T454_1 | 1.07E-07 | M967T671_2 | 0.001893 |
| M468T645 | 1.07E-07 | M587T369 | 0.0019013 |
| M1205T368_1 | 1.13E-07 | M881T305 | 0.0019013 |
| M717T451 | 1.16E-07 | M1435T341_1 | 0.0019032 |
| M647T452 | 1.17E-07 | M655T287 | 0.0019054 |
| M643T454 | 1.19E-07 | M1165T285 | 0.0019054 |
| M600T453_1 | 1.21E-07 | M571T59 | 0.0019109 |
| M599T453 | 1.24E-07 | M808T114 | 0.0019114 |
| M704T453_3 | 1.31E-07 | M168T156 | 0.0019175 |
| M650T452_1 | 1.32E-07 | M370T346 | 0.0019451 |
| M788T452_2 | 1.32E-07 | M417T51 | 0.0019603 |
| M684T452 | 1.39E-07 | M1280T398 | 0.0019603 |
| M969T451_2 | 1.41E-07 | M467T60 | 0.0019744 |
| M820T428_1 | 1.41E-07 | M863T67 | 0.0019744 |
| M629T451 | 1.49E-07 | M655T357 | 0.0019744 |
| M591T450 | 1.50E-07 | M652T350_1 | 0.0019744 |
| M562T450 | 1.50E-07 | M1189T67 | 0.0019811 |
| M776T425 | 1.57E-07 | M1280T302 | 0.0019811 |
| M745T454_1 | 1.58E-07 | M381T333 | 0.0019934 |
| M781T383 | 1.58E-07 | M207T126 | 0.0019934 |
| M842T429_2 | 1.77E-07 | M230T122 | 0.0020312 |
| M629T452 | 1.81E-07 | M1182T365 | 0.0020583 |
| M616T450_2 | 1.86E-07 | M166T122 | 0.0020583 |
| M587T453_2 | 1.91E-07 | M1303T380 | 0.0020704 |
| M741T454_1 | 1.92E-07 | M1238T364 | 0.0020705 |
| M1111T447_1 | 1.92E-07 | M1244T435 | 0.0020705 |
| M651T452 | 1.93E-07 | M1245T384_1 | 0.002134 |
| M744T450_4 | 2.07E-07 | M228T120 | 0.0021473 |
| M433T579 | 2.22E-07 | M704T286 | 0.0021911 |
| M798T427 | 2.23E-07 | M290T118 | 0.0021911 |
| M701T453_1 | 2.34E-07 | M345T286 | 0.0022091 |
| M725T453 | 2.34E-07 | M774T353 | 0.0022228 |
| M672T452_2 | 2.39E-07 | M987T287 | 0.0022429 |
| M631T451_1 | 2.42E-07 | M1281T398 | 0.0022429 |
| M691T452 | 2.45E-07 | M159T63 | 0.0022429 |
| M362T506 | 2.45E-07 | M867T349 | 0.0022429 |
| M675T452_2 | 2.45E-07 | M1166T286 | 0.0022452 |
| M754T424_1 | 2.48E-07 | M534T286 | 0.0022533 |
| M416T397 | 2.56E-07 | M230T102 | 0.0023045 |
| M969T669_1 | 2.56E-07 | M565T404 | 0.0023056 |
| M686T452 | 2.56E-07 | M723T59 | 0.0023123 |
| M556T643 | 2.56E-07 | M553T363 | 0.0023512 |
| M886T431_1 | 2.57E-07 | M281T50 | 0.0023802 |
| M908T432_1 | 2.67E-07 | M852T387_1 | 0.0023802 |
| M696T453_2 | 2.67E-07 | M1038T403 | 0.0023802 |
| M658T452_2 | 2.70E-07 | M1108T368 | 0.0023831 |
| M623T451_2 | 2.70E-07 | M1087T391_2 | 0.002403 |
| M682T452_2 | 2.71E-07 | M1188T67 | 0.002403 |
| M711T453_2 | 2.79E-07 | M864T67 | 0.0024054 |
| M1205T368_2 | 2.79E-07 | M1068T376_1 | 0.0024054 |
| M732T423_1 | 2.80E-07 | M58T113 | 0.0024054 |
| M615T450 | 2.80E-07 | M712T123 | 0.0024309 |
| M821T428_1 | 2.85E-07 | M1087T391_1 | 0.0024445 |
| M569T452 | 2.86E-07 | M966T497 | 0.0024446 |
| M674T452_1 | 2.87E-07 | M444T312 | 0.0024521 |
| M615T452 | 2.91E-07 | M928T388_2 | 0.0024521 |
| M602T453 | 2.91E-07 | M941T425 | 0.0024521 |
| M666T452_2 | 2.92E-07 | M329T441 | 0.0024521 |
| M1204T367 | 2.95E-07 | M1088T391_1 | 0.0024521 |
| M597T450 | 2.96E-07 | M1411T67 | 0.0025107 |
| M719T453 | 2.99E-07 | M1377T372_2 | 0.002512 |
| M641T452 | 3.02E-07 | M967T671_1 | 0.0025184 |
| M620T452_1 | 3.11E-07 | M1435T341_2 | 0.0025464 |
| M660T452_3 | 3.23E-07 | M599T67 | 0.0025777 |
| M733T454_3 | 3.28E-07 | M598T67 | 0.0026192 |
| M666T452_1 | 3.44E-07 | M850T368 | 0.002671 |
| M639T451_2 | 3.46E-07 | M576T338 | 0.0026944 |
| M839T111 | 3.46E-07 | M447T67 | 0.0027225 |
| M593T452_2 | 3.46E-07 | M130T201 | 0.0027637 |
| M651T451 | 3.63E-07 | M1227T286 | 0.0027637 |
| M456T587 | 3.65E-07 | M575T337 | 0.0027712 |
| M625T454_1 | 3.70E-07 | M628T370 | 0.002802 |
| M692T453_2 | 3.96E-07 | M1174T369 | 0.0028131 |
| M683T453_2 | 3.99E-07 | M346T288 | 0.0029063 |
| M697T453_1 | 4.24E-07 | M763T386 | 0.0029092 |
| M664T452 | 4.55E-07 | M1035T364 | 0.0029388 |
| M613T451_3 | 4.56E-07 | M1187T67 | 0.0029388 |
| M573T453 | 4.58E-07 | M372T310 | 0.0029388 |
| M797T452_2 | 4.66E-07 | M890T194 | 0.0029388 |
| M560T452_2 | 4.80E-07 | M128T156 | 0.0029566 |
| M613T452 | 4.80E-07 | M1068T376_2 | 0.0029763 |
| M804T367 | 4.86E-07 | M653T350 | 0.0029763 |
| M318T505 | 4.87E-07 | M153T287 | 0.0030316 |
| M635T451_1 | 4.95E-07 | M636T353 | 0.0030316 |
| M970T451_2 | 5.05E-07 | M830T293 | 0.0030316 |
| M797T446 | 5.11E-07 | M1305T380 | 0.0030316 |
| M622T451_2 | 5.14E-07 | M1161T329 | 0.0030316 |
| M694T453_2 | 5.14E-07 | M1026T67 | 0.0030438 |
| M605T450_1 | 5.17E-07 | M954T288 | 0.0030467 |
| M693T453 | 5.20E-07 | M1164T285 | 0.0030586 |
| M703T453 | 5.20E-07 | M663T61 | 0.0030766 |
| M622T451_1 | 5.30E-07 | M1130T288 | 0.0031655 |
| M886T431_2 | 5.58E-07 | M875T437 | 0.0031717 |
| M788T451 | 5.81E-07 | M775T353 | 0.0032394 |
| M500T586 | 5.90E-07 | M207T105 | 0.0032739 |
| M704T453_4 | 5.90E-07 | M968T412 | 0.0032739 |
| M592T451 | 5.90E-07 | M1028T377 | 0.0032739 |
| M663T452 | 5.90E-07 | M864T334 | 0.0032997 |
| M852T282_1 | 5.92E-07 | M288T120 | 0.0032997 |
| M631T453 | 6.00E-07 | M151T368 | 0.0033172 |
| M589T453_3 | 6.04E-07 | M1250T67 | 0.0033172 |
| M644T452 | 6.13E-07 | M701T60 | 0.0033519 |
| M611T452 | 6.19E-07 | M1349T67 | 0.0033519 |
| M648T453 | 6.20E-07 | M925T350 | 0.0033519 |
| M634T451_1 | 6.21E-07 | M654T357 | 0.0033519 |
| M597T453 | 6.25E-07 | M335T60 | 0.0033659 |
| M564T452_1 | 6.30E-07 | M954T498 | 0.0034021 |
| M418T579 | 6.46E-07 | M1028T376 | 0.0034205 |
| M666T453 | 6.46E-07 | M469T307 | 0.0034348 |
| M569T449 | 6.66E-07 | M734T366 | 0.0035224 |
| M644T451_1 | 6.69E-07 | M1304T380_1 | 0.0035383 |
| M575T452_2 | 7.15E-07 | M1304T350 | 0.0036466 |
| M626T453 | 7.49E-07 | M1005T376 | 0.003648 |
| M580T451 | 7.74E-07 | M380T344 | 0.0036702 |
| M812T380 | 7.80E-07 | M1414T385_2 | 0.0036702 |
| M719T454 | 7.80E-07 | M1027T67 | 0.0036744 |
| M319T505 | 7.94E-07 | M659T680 | 0.0036781 |
| M584T450_1 | 7.94E-07 | M1028T67 | 0.0037223 |
| M718T453_2 | 8.01E-07 | M174T131 | 0.0037425 |
| M642T452 | 8.04E-07 | M201T111 | 0.0037788 |
| M656T452 | 8.20E-07 | M566T342_2 | 0.0038034 |
| M638T451_4 | 8.67E-07 | M785T285 | 0.0038034 |
| M631T452 | 8.88E-07 | M167T157 | 0.0038271 |
| M639T451_1 | 9.34E-07 | M781T419 | 0.0038271 |
| M710T454 | 9.41E-07 | M603T60 | 0.0038271 |
| M617T451 | 9.41E-07 | M1151T337 | 0.0038271 |
| M1036T454 | 9.49E-07 | M236T415 | 0.0038271 |
| M678T280 | 9.70E-07 | M358T337 | 0.0038271 |
| M619T451_2 | 9.97E-07 | M369T60_1 | 0.0038271 |
| M765T382 | 1.01E-06 | M1249T67 | 0.0038271 |
| M610T453_2 | 1.01E-06 | M1064T391_2 | 0.0038271 |
| M434T579 | 1.01E-06 | M617T362 | 0.0038271 |
| M585T453 | 1.02E-06 | M969T412 | 0.0038271 |
| M876T281_2 | 1.06E-06 | M874T437 | 0.0038271 |
| M570T451 | 1.09E-06 | M1262T329 | 0.0038898 |
| M653T452_2 | 1.09E-06 | M619T334_1 | 0.0038898 |
| M578T453_2 | 1.09E-06 | M951T361_2 | 0.0038898 |
| M547T451_2 | 1.10E-06 | M721T50 | 0.0039053 |
| M732T423_2 | 1.10E-06 | M695T489 | 0.0039061 |
| M697T452_1 | 1.12E-06 | M221T66 | 0.0039274 |
| M660T452_2 | 1.18E-06 | M167T539 | 0.0039737 |
| M612T450_1 | 1.20E-06 | M778T308 | 0.0039737 |
| M624T451_1 | 1.20E-06 | M968T468 | 0.0039737 |
| M599T451 | 1.24E-06 | M1058T384 | 0.0039771 |
| M753T450 | 1.25E-06 | M658T378_2 | 0.0039821 |
| M608T454 | 1.31E-06 | M639T347 | 0.0039821 |
| M590T449 | 1.31E-06 | M1305T350 | 0.0039821 |
| M580T450 | 1.31E-06 | M1303T350 | 0.0039821 |
| M646T452 | 1.33E-06 | M1238T332 | 0.0039821 |
| M606T453 | 1.38E-06 | M128T180 | 0.0040246 |
| M643T452_1 | 1.41E-06 | M1340T289 | 0.0040611 |
| M719T451 | 1.42E-06 | M371T318 | 0.0040763 |
| M605T450_2 | 1.45E-06 | M127T62 | 0.0040985 |
| M635T452 | 1.45E-06 | M528T282 | 0.0041348 |
| M589T453_2 | 1.46E-06 | M447T350 | 0.0041544 |
| M523T575 | 1.47E-06 | M927T67 | 0.0041768 |
| M803T367_3 | 1.48E-06 | M79T61_1 | 0.0041768 |
| M638T451_2 | 1.52E-06 | M393T331 | 0.0042138 |
| M1087T356 | 1.52E-06 | M1064T391_1 | 0.0042419 |
| M952T433 | 1.53E-06 | M445T66 | 0.0043737 |
| M803T367_2 | 1.54E-06 | M792T420 | 0.0043956 |
| M566T452_1 | 1.58E-06 | M299T287 | 0.0043956 |
| M641T451_2 | 1.60E-06 | M202T61 | 0.0044161 |
| M695T452_1 | 1.60E-06 | M300T363 | 0.0044727 |
| M591T452 | 1.64E-06 | M491T451 | 0.0044727 |
| M864T430_2 | 1.64E-06 | M486T318 | 0.0044904 |
| M656T454 | 1.69E-06 | M779T68 | 0.0045203 |
| M968T669 | 1.72E-06 | M1025T67 | 0.004528 |
| M974T435_1 | 1.74E-06 | M725T284 | 0.0045525 |
| M545T451 | 1.74E-06 | M660T362 | 0.0045748 |
| M1058T334_2 | 1.78E-06 | M497T326 | 0.0046203 |
| M660T453 | 1.78E-06 | M81T68 | 0.0046203 |
| M614T452_2 | 1.82E-06 | M926T67 | 0.0046367 |
| M421T276_1 | 1.85E-06 | M351T60 | 0.0046498 |
| M663T451 | 1.85E-06 | M380T63 | 0.0047025 |
| M930T433_1 | 1.87E-06 | M966T671 | 0.0047274 |
| M702T453_2 | 1.87E-06 | M360T292 | 0.0047654 |
| M500T277 | 1.87E-06 | M862T334 | 0.0048189 |
| M595T453_3 | 1.90E-06 | M952T349 | 0.0048694 |
| M1090T285 | 1.97E-06 | M679T361 | 0.004879 |
| M668T453_1 | 1.97E-06 | M974T67 | 0.004879 |
| M544T451 | 1.98E-06 | M753T50 | 0.004879 |
| M714T453 | 1.98E-06 | M448T350 | 0.0049304 |
| M688T450 | 1.98E-06 | M925T67 | 0.0049609 |
| M701T453_2 | 2.00E-06 | M863T334 | 0.0050011 |
| M614T452_1 | 2.00E-06 | M377T67 | 0.0050255 |
| M671T452_1 | 2.00E-06 | M889T381 | 0.0050751 |
| M620T452_2 | 2.05E-06 | M797T419 | 0.0051188 |
| M576T453 | 2.10E-06 | M967T497_1 | 0.0051227 |
| M538T452 | 2.13E-06 | M1377T372_1 | 0.0051431 |
| M707T452 | 2.13E-06 | M1005T377 | 0.0051645 |
| M619T452 | 2.13E-06 | M372T417 | 0.0051724 |
| M675T453 | 2.20E-06 | M1193T374 | 0.0051855 |
| M1213T366_2 | 2.32E-06 | M201T71 | 0.0052072 |
| M554T451 | 2.36E-06 | M1160T329 | 0.0052173 |
| M731T423 | 2.36E-06 | M293T318 | 0.0052173 |
| M688T453_2 | 2.36E-06 | M800T422 | 0.0052265 |
| M710T422_2 | 2.37E-06 | M678T284 | 0.0052265 |
| M584T452 | 2.37E-06 | M1152T337 | 0.0052265 |
| M970T669 | 2.37E-06 | M356T356 | 0.0054386 |
| M705T452 | 2.40E-06 | M586T359 | 0.0054441 |
| M1114T281 | 2.40E-06 | M1482T386 | 0.0054699 |
| M629T454_2 | 2.48E-06 | M951T344 | 0.0054716 |
| M275T503 | 2.48E-06 | M1241T289 | 0.0055224 |
| M669T452_1 | 2.50E-06 | M587T344 | 0.0055226 |
| M587T449 | 2.52E-06 | M1486T285 | 0.0055314 |
| M570T452 | 2.52E-06 | M1266T339 | 0.0055315 |
| M594T450_2 | 2.52E-06 | M183T176 | 0.0055504 |
| M685T453_1 | 2.55E-06 | M834T324 | 0.0055504 |
| M642T396_2 | 2.56E-06 | M619T364 | 0.005583 |
| M753T424 | 2.60E-06 | M396T309 | 0.0057396 |
| M930T433_2 | 2.60E-06 | M453T67 | 0.0058043 |
| M628T451_1 | 2.60E-06 | M333T51 | 0.0058147 |
| M697T453_2 | 2.61E-06 | M633T351 | 0.0060935 |
| M678T453_1 | 2.66E-06 | M788T390_1 | 0.0061139 |
| M685T453_2 | 2.69E-06 | M1263T329 | 0.0061197 |
| M612T453_2 | 2.70E-06 | M1240T289 | 0.0061721 |
| M583T452_2 | 2.72E-06 | M568T286 | 0.0061827 |
| M672T452_3 | 2.74E-06 | M540T284 | 0.0062078 |
| M673T452_1 | 2.76E-06 | M799T421_2 | 0.0062078 |
| M467T276_1 | 2.78E-06 | M940T424 | 0.0062634 |
| M762T454 | 2.78E-06 | M379T66 | 0.0063117 |
| M709T422 | 2.84E-06 | M1152T291 | 0.00633 |
| M576T452_2 | 2.84E-06 | M1006T376_1 | 0.0063341 |
| M553T452_1 | 2.86E-06 | M1495T289 | 0.0063341 |
| M616T450_3 | 3.10E-06 | M1377T334 | 0.0063854 |
| M601T452 | 3.17E-06 | M828T286 | 0.0064523 |
| M682T452_3 | 3.19E-06 | M488T317 | 0.0064933 |
| M653T452_1 | 3.21E-06 | M724T363 | 0.0064933 |
| M633T451 | 3.28E-06 | M1011T362_1 | 0.0064933 |
| M608T453 | 3.39E-06 | M868T368 | 0.0065089 |
| M995T668 | 3.43E-06 | M525T356 | 0.0065524 |
| M1234T317_2 | 3.46E-06 | M1087T67 | 0.0065524 |
| M623T453 | 3.46E-06 | M737T360 | 0.0066084 |
| M609T451_1 | 3.54E-06 | M530T454 | 0.0066088 |
| M865T430 | 3.56E-06 | M1242T422 | 0.0066397 |
| M695T452_2 | 3.68E-06 | M941T424 | 0.0066562 |
| M368T589 | 3.89E-06 | M606T375 | 0.0066621 |
| M1206T367 | 3.95E-06 | M157T246 | 0.0066719 |
| M688T453_1 | 4.00E-06 | M705T67 | 0.0067463 |
| M457T586 | 4.09E-06 | M1194T374_2 | 0.0067638 |
| M594T450_3 | 4.09E-06 | M844T402 | 0.0068009 |
| M721T582 | 4.41E-06 | M410T277 | 0.0068157 |
| M346T535 | 4.48E-06 | M356T393 | 0.0068157 |
| M619T451_1 | 4.54E-06 | M1268T337 | 0.0068157 |
| M650T452_2 | 4.59E-06 | M378T67 | 0.0068258 |
| M387T575 | 4.63E-06 | M1268T384 | 0.006852 |
| M295T60 | 4.63E-06 | M875T499 | 0.0070823 |
| M364T506 | 4.66E-06 | M864T320 | 0.0070898 |
| M622T453 | 4.74E-06 | M640T347 | 0.0071397 |
| M683T453_1 | 4.82E-06 | M165T70 | 0.0071469 |
| M641T454 | 4.84E-06 | M446T288 | 0.0071769 |
| M1035T359 | 4.84E-06 | M799T421_1 | 0.0071804 |
| M566T452_2 | 4.87E-06 | M405T333 | 0.0071902 |
| M923T282_2 | 4.92E-06 | M215T447 | 0.0072871 |
| M646T451_1 | 5.00E-06 | M1483T386 | 0.0072871 |
| M607T451 | 5.09E-06 | M1151T299 | 0.0073313 |
| M677T451 | 5.12E-06 | M639T348 | 0.0073757 |
| M665T452_1 | 5.12E-06 | M753T304 | 0.0073757 |
| M797T285 | 5.37E-06 | M365T295 | 0.0073757 |
| M274T503 | 5.38E-06 | M845T401 | 0.0074338 |
| M628T452 | 5.48E-06 | M516T363 | 0.0074852 |
| M852T281 | 5.66E-06 | M995T171 | 0.0076394 |
| M631T451_2 | 5.67E-06 | M129T654 | 0.0076469 |
| M712T453_1 | 5.98E-06 | M930T375 | 0.0076828 |
| M1036T359 | 6.01E-06 | M1280T348 | 0.0077078 |
| M604T453_2 | 6.04E-06 | M1132T367 | 0.0077253 |
| M1087T358 | 6.18E-06 | M798T421 | 0.0077899 |
| M749T451 | 6.31E-06 | M357T102 | 0.0078551 |
| M746T453 | 6.42E-06 | M1166T435 | 0.0079042 |
| M525T275_1 | 6.48E-06 | M249T496 | 0.007914 |
| M688T421 | 6.60E-06 | M722T356 | 0.0079512 |
| M821T349 | 6.68E-06 | M954T671_1 | 0.0079523 |
| M599T450_1 | 6.69E-06 | M794T322_1 | 0.0079523 |
| M435T344 | 6.87E-06 | M1015T297 | 0.0079523 |
| M421T276_3 | 7.04E-06 | M258T296 | 0.0080279 |
| M604T453_1 | 7.05E-06 | M505T60 | 0.0080609 |
| M635T342 | 7.12E-06 | M1072T284 | 0.0081 |
| M1138T400_1 | 7.17E-06 | M918T465 | 0.0081555 |
| M621T451_2 | 7.52E-06 | M1278T347 | 0.0082241 |
| M582T453 | 7.92E-06 | M1118T289 | 0.0082241 |
| M603T452 | 7.97E-06 | M750T381 | 0.0082461 |
| M587T452 | 8.41E-06 | M372T352 | 0.0083356 |
| M612T450_2 | 8.44E-06 | M796T419 | 0.0083356 |
| M928T383_2 | 8.51E-06 | M223T461 | 0.0083356 |
| M636T452_1 | 8.57E-06 | M744T386 | 0.0083356 |
| M135T579 | 8.68E-06 | M705T287 | 0.0083356 |
| M595T453_2 | 8.68E-06 | M776T352 | 0.0083356 |
| M739T278 | 8.68E-06 | M477T305 | 0.0084356 |
| M591T453 | 8.90E-06 | M1071T284 | 0.008489 |
| M1166T393 | 9.15E-06 | M328T356 | 0.0085071 |
| M687T278 | 9.32E-06 | M1267T338_2 | 0.00853 |
| M690T453_1 | 9.32E-06 | M308T284 | 0.0086313 |
| M584T450_2 | 9.66E-06 | M945T199 | 0.0086313 |
| M843T429_1 | 9.73E-06 | M1173T366 | 0.0086313 |
| M451T507 | 9.73E-06 | M476T305 | 0.0086765 |
| M668T452 | 9.77E-06 | M581T324 | 0.0086765 |
| M638T451_3 | 9.81E-06 | M405T310 | 0.0087585 |
| M826T278 | 9.88E-06 | M967T497_2 | 0.0087585 |
| M694T452 | 9.91E-06 | M767T360 | 0.0087682 |
| M435T278 | 9.95E-06 | M879T286 | 0.0088217 |
| M967T656 | 1.01E-05 | M1315T67 | 0.0088254 |
| M764T382 | 1.01E-05 | M417T327 | 0.0089656 |
| M606T451_2 | 1.03E-05 | M831T395_1 | 0.0089943 |
| M850T283_1 | 1.03E-05 | M463T289 | 0.009042 |
| M372T383_2 | 1.03E-05 | M1398T402 | 0.0090668 |
| M621T451_1 | 1.04E-05 | M771T311 | 0.0091606 |
| M737T453 | 1.05E-05 | M307T112 | 0.0091606 |
| M1138T400_2 | 1.07E-05 | M765T67 | 0.0091978 |
| M545T584 | 1.08E-05 | M763T67 | 0.0092288 |
| M119T579 | 1.09E-05 | M435T61 | 0.0093549 |
| M721T452 | 1.09E-05 | M636T291 | 0.0093549 |
| M395T588 | 1.11E-05 | M1089T67 | 0.0096158 |
| M553T452_2 | 1.12E-05 | M954T671_2 | 0.0096227 |
| M604T451 | 1.12E-05 | M1101T401 | 0.0096227 |
| M682T280_2 | 1.12E-05 | M1485T286 | 0.0096554 |
| M656T451 | 1.14E-05 | M1117T288 | 0.0096554 |
| M643T452_2 | 1.17E-05 | M650T66 | 0.0096554 |
| M671T378 | 1.18E-05 | M494T285 | 0.0096954 |
| M579T452 | 1.18E-05 | M372T367 | 0.0097085 |
| M355T273 | 1.21E-05 | M609T59 | 0.0098086 |
| M688T420 | 1.24E-05 | M311T586 | 0.0098258 |
| M1235T317_2 | 1.27E-05 | M926T350 | 0.0098258 |
| M1108T365 | 1.27E-05 | M1053T334 | 0.0099941 |
| M923T281 | 1.28E-05 | M654T300 | 0.010017 |
| M1199T306 | 1.28E-05 | M1088T67 | 0.010023 |
| M776T426 | 1.29E-05 | M764T114 | 0.010135 |
| M1235T317_1 | 1.29E-05 | M183T156 | 0.010135 |
| M1199T307_2 | 1.30E-05 | M735T374_2 | 0.010139 |
| M929T383 | 1.31E-05 | M827T498 | 0.01039 |
| M638T382 | 1.31E-05 | M619T334_2 | 0.010583 |
| M321T314 | 1.33E-05 | M1267T338_1 | 0.010634 |
| M562T452 | 1.38E-05 | M312T586 | 0.010671 |
| M1063T323_2 | 1.40E-05 | M559T66 | 0.010807 |
| M841T452 | 1.40E-05 | M93T56 | 0.010919 |
| M557T452 | 1.42E-05 | M205T286 | 0.01096 |
| M676T582 | 1.43E-05 | M914T366_2 | 0.011136 |
| M1407T311_1 | 1.46E-05 | M502T293 | 0.011136 |
| M1132T356 | 1.46E-05 | M304T284 | 0.011365 |
| M662T452 | 1.49E-05 | M828T422 | 0.011367 |
| M1063T285_1 | 1.49E-05 | M738T386 | 0.011395 |
| M303T534 | 1.50E-05 | M841T420 | 0.011398 |
| M689T640 | 1.52E-05 | M286T339 | 0.011426 |
| M911T400_2 | 1.54E-05 | M392T331 | 0.011565 |
| M421T276_2 | 1.55E-05 | M599T282 | 0.01157 |
| M657T452_3 | 1.60E-05 | M782T66 | 0.011676 |
| M616T452 | 1.63E-05 | M355T157 | 0.011782 |
| M950T388_1 | 1.63E-05 | M601T299 | 0.011851 |
| M799T427_1 | 1.63E-05 | M890T165 | 0.012078 |
| M780T383 | 1.67E-05 | M722T66 | 0.012136 |
| M812T379 | 1.68E-05 | M659T378 | 0.012363 |
| M503T450 | 1.68E-05 | M459T583 | 0.012363 |
| M598T453 | 1.69E-05 | M763T115 | 0.012502 |
| M750T279 | 1.69E-05 | M485T50 | 0.012592 |
| M644T641 | 1.71E-05 | M625T59 | 0.012631 |
| M1063T284_1 | 1.75E-05 | M1253T67 | 0.012638 |
| M754T424_2 | 1.76E-05 | M286T290 | 0.012647 |
| M572T452 | 1.78E-05 | M765T114 | 0.012824 |
| M708T284_2 | 1.79E-05 | M1484T386 | 0.012857 |
| M787T279 | 1.80E-05 | M704T67 | 0.012882 |
| M1139T399 | 1.85E-05 | M473T60 | 0.012917 |
| M688T453_3 | 1.88E-05 | M816T360 | 0.013116 |
| M551T451_1 | 1.89E-05 | M996T171 | 0.013116 |
| M565T450 | 1.93E-05 | M1433T398 | 0.013145 |
| M851T67 | 1.93E-05 | M1435T398 | 0.013187 |
| M329T68 | 1.93E-05 | M1032T362 | 0.01319 |
| M1037T286_2 | 1.94E-05 | M1046T379 | 0.01319 |
| M1109T364 | 1.96E-05 | M1112T366_1 | 0.01331 |
| M468T311 | 1.97E-05 | M793T404 | 0.013319 |
| M276T503 | 1.99E-05 | M376T393 | 0.013371 |
| M609T450 | 2.00E-05 | M1223T285 | 0.013433 |
| M531T579 | 2.04E-05 | M580T289 | 0.013453 |
| M363T506 | 2.07E-05 | M389T347 | 0.013468 |
| M1062T284 | 2.07E-05 | M381T66 | 0.013564 |
| M1438T306 | 2.09E-05 | M555T330 | 0.013564 |
| M562T278_1 | 2.09E-05 | M667T124 | 0.013606 |
| M633T584 | 2.10E-05 | M1434T398 | 0.013666 |
| M561T277 | 2.10E-05 | M1223T373 | 0.013812 |
| M830T667_2 | 2.19E-05 | M626T66 | 0.014015 |
| M433T274_1 | 2.22E-05 | M436T74 | 0.014032 |
| M679T452_2 | 2.24E-05 | M1383T290_2 | 0.014219 |
| M1329T323 | 2.26E-05 | M573T315 | 0.014231 |
| M360T313 | 2.32E-05 | M627T66 | 0.014457 |
| M554T274_2 | 2.37E-05 | M670T323 | 0.014624 |
| M974T283 | 2.42E-05 | M794T322_2 | 0.014673 |
| M1329T324_2 | 2.47E-05 | M1048T379 | 0.014694 |
| M407T506 | 2.47E-05 | M568T337 | 0.014704 |
| M1062T285_3 | 2.71E-05 | M778T330 | 0.014851 |
| M837T366 | 2.71E-05 | M360T141 | 0.014966 |
| M560T452_3 | 2.71E-05 | M181T392 | 0.014967 |
| M398T579 | 2.80E-05 | M1047T379 | 0.015004 |
| M670T452 | 2.84E-05 | M367T284 | 0.015004 |
| M302T534 | 2.87E-05 | M391T59 | 0.015098 |
| M516T452 | 2.99E-05 | M599T139 | 0.015206 |
| M433T274_2 | 2.99E-05 | M681T379 | 0.015206 |
| M895T344 | 3.09E-05 | M293T335 | 0.015206 |
| M1064T323 | 3.17E-05 | M1036T364_1 | 0.015206 |
| M628T451_2 | 3.19E-05 | M925T165 | 0.01524 |
| M730T281_1 | 3.19E-05 | M294T335 | 0.015241 |
| M261T302 | 3.22E-05 | M1329T376 | 0.015431 |
| M759T283_1 | 3.23E-05 | M726T320 | 0.015571 |
| M1230T316_1 | 3.27E-05 | M1222T373_2 | 0.015737 |
| M897T578 | 3.29E-05 | M113T52 | 0.015814 |
| M1212T365 | 3.40E-05 | M229T358 | 0.016191 |
| M320T505 | 3.45E-05 | M1005T424_1 | 0.016245 |
| M1023T281 | 3.53E-05 | M641T299 | 0.016245 |
| M1131T363 | 3.54E-05 | M1065T391 | 0.016245 |
| M442T298 | 3.55E-05 | M258T194 | 0.016245 |
| M736T454 | 3.57E-05 | M130T458 | 0.016311 |
| M978T286 | 3.58E-05 | M1330T375 | 0.016639 |
| M920T376 | 3.60E-05 | M1194T374_1 | 0.01702 |
| M814T281 | 3.62E-05 | M344T292 | 0.017061 |
| M1231T317_1 | 3.69E-05 | M781T66 | 0.01709 |
| M318T273 | 3.79E-05 | M743T386 | 0.01725 |
| M1213T366_1 | 3.81E-05 | M663T343 | 0.017292 |
| M710T422_1 | 3.81E-05 | M1341T289 | 0.017442 |
| M967T279 | 3.87E-05 | M752T301 | 0.017507 |
| M829T667 | 3.90E-05 | M1151T284 | 0.017532 |
| M1006T277 | 3.92E-05 | M1070T359 | 0.017533 |
| M562T278_2 | 3.93E-05 | M504T290 | 0.017738 |
| M1095T286_1 | 3.94E-05 | M618T365 | 0.017886 |
| M657T452_4 | 3.95E-05 | M742T386 | 0.017905 |
| M1095T286_2 | 3.96E-05 | M1382T290_2 | 0.017905 |
| M723T454 | 4.01E-05 | M635T351 | 0.017922 |
| M667T113 | 4.05E-05 | M736T331 | 0.017922 |
| M803T367_1 | 4.12E-05 | M484T318 | 0.01813 |
| M1328T324 | 4.12E-05 | M1382T290_1 | 0.018385 |
| M632T583 | 4.25E-05 | M1165T434 | 0.01847 |
| M881T277 | 4.37E-05 | M442T313 | 0.018477 |
| M413T586 | 4.52E-05 | M1111T333 | 0.018508 |
| M510T277 | 4.54E-05 | M1387T373 | 0.018866 |
| M995T283 | 4.59E-05 | M374T288 | 0.019359 |
| M538T427_2 | 4.69E-05 | M1005T424_2 | 0.019408 |
| M1090T286 | 4.72E-05 | M1011T170 | 0.019567 |
| M641T394 | 4.87E-05 | M1059T385 | 0.019616 |
| M557T279 | 4.89E-05 | M519T350 | 0.019662 |
| M951T388_1 | 4.93E-05 | M657T373 | 0.019778 |
| M817T286 | 4.98E-05 | M658T378_1 | 0.019778 |
| M953T282_2 | 5.05E-05 | M764T67 | 0.019778 |
| M625T276_3 | 5.32E-05 | M560T296 | 0.019891 |
| M1185T361 | 5.38E-05 | M713T409 | 0.019906 |
| M929T382 | 5.42E-05 | M939T318 | 0.019974 |
| M552T428 | 5.44E-05 | M375T349 | 0.020304 |
| M1005T404 | 5.51E-05 | M1398T401 | 0.020326 |
| M591T276_1 | 5.52E-05 | M1317T379 | 0.02047 |
| M762T590 | 5.54E-05 | M888T381 | 0.02051 |
| M899T324 | 5.55E-05 | M616T363 | 0.02058 |
| M1405T311_2 | 5.58E-05 | M518T350 | 0.020674 |
| M118T66 | 5.58E-05 | M1129T289 | 0.020775 |
| M814T282_2 | 5.58E-05 | M522T352 | 0.020838 |
| M433T328 | 5.66E-05 | M515T344 | 0.020965 |
| M1063T285_2 | 5.82E-05 | M623T306 | 0.02123 |
| M589T451 | 5.92E-05 | M93T144 | 0.021412 |
| M1329T324_1 | 6.12E-05 | M1112T366_2 | 0.021439 |
| M824T275 | 6.14E-05 | M946T390 | 0.021439 |
| M1438T307 | 6.14E-05 | M918T466 | 0.021658 |
| M679T277_1 | 6.15E-05 | M180T246 | 0.021658 |
| M818T392_2 | 6.22E-05 | M1270T376 | 0.0217 |
| M1329T324_3 | 6.25E-05 | M593T559 | 0.021805 |
| M683T284_2 | 6.25E-05 | M640T298 | 0.022203 |
| M185T301 | 6.44E-05 | M1172T359 | 0.022313 |
| M773T282_2 | 6.55E-05 | M651T66 | 0.022802 |
| M1407T312 | 6.55E-05 | M554T330 | 0.022802 |
| M849T282 | 6.59E-05 | M772T404 | 0.022853 |
| M434T276_2 | 6.63E-05 | M1188T349 | 0.022916 |
| M669T374_2 | 6.67E-05 | M496T367 | 0.023282 |
| M1268T388 | 6.67E-05 | M549T67 | 0.023456 |
| M1199T307_1 | 6.71E-05 | M125T286 | 0.023456 |
| M497T52_1 | 6.76E-05 | M521T66 | 0.023648 |
| M677T582 | 6.87E-05 | M511T266 | 0.023651 |
| M1410T334_2 | 6.92E-05 | M814T361 | 0.023651 |
| M521T275_1 | 7.11E-05 | M485T317 | 0.023651 |
| M687T420 | 7.35E-05 | M300T306 | 0.02367 |
| M882T282_2 | 7.47E-05 | M726T402 | 0.023703 |
| M1172T311 | 7.47E-05 | M390T413 | 0.023703 |
| M1063T324 | 7.54E-05 | M1028T354 | 0.023804 |
| M501T277 | 7.55E-05 | M432T288 | 0.02399 |
| M731T52 | 7.68E-05 | M768T360 | 0.024028 |
| M720T347 | 7.77E-05 | M762T387 | 0.024028 |
| M587T273_1 | 7.77E-05 | M1319T378 | 0.024054 |
| M558T279_1 | 7.79E-05 | M758T292 | 0.024086 |
| M1349T324_3 | 7.81E-05 | M1238T388 | 0.0241 |
| M676T452_3 | 7.88E-05 | M779T330 | 0.024375 |
| M1058T334_1 | 7.88E-05 | M676T375_1 | 0.024966 |
| M1069T376 | 8.26E-05 | M174T458 | 0.025025 |
| M911T400_1 | 8.36E-05 | M161T71 | 0.025114 |
| M482T275_1 | 8.38E-05 | M1189T350_2 | 0.025114 |
| M900T324_1 | 8.48E-05 | M740T386 | 0.025114 |
| M582T430_1 | 8.56E-05 | M330T364 | 0.025114 |
| M523T425_2 | 8.84E-05 | M1038T402 | 0.025114 |
| M169T151 | 8.91E-05 | M572T382 | 0.025114 |
| M600T274 | 9.00E-05 | M470T312 | 0.025114 |
| M1119T285 | 9.25E-05 | M438T318 | 0.025116 |
| M983T288 | 9.28E-05 | M1383T290_1 | 0.02542 |
| M1267T389 | 9.28E-05 | M337T61 | 0.025545 |
| M1418T334_1 | 9.33E-05 | M260T60 | 0.025594 |
| M1042T317_1 | 9.36E-05 | M793T322 | 0.02566 |
| M1350T324_1 | 9.47E-05 | M389T67 | 0.02569 |
| M804T368 | 9.48E-05 | M317T587 | 0.025728 |
| M1288T307_2 | 9.70E-05 | M938T499 | 0.025962 |
| M690T67 | 9.71E-05 | M940T318 | 0.02605 |
| M482T579 | 9.77E-05 | M613T400 | 0.02605 |
| M1110T363 | 9.87E-05 | M1378T334 | 0.02605 |
| M432T363 | 9.90E-05 | M1222T373_1 | 0.026177 |
| M761T590 | 9.93E-05 | M1125T367_2 | 0.026212 |
| M1398T287 | 0.00010039 | M1104T330 | 0.026308 |
| M246T465 | 0.00010111 | M1069T359 | 0.026308 |
| M1251T317_1 | 0.00010117 | M789T51 | 0.026482 |
| M868T335_2 | 0.00010206 | M1164T436 | 0.026763 |
| M647T52 | 0.0001029 | M259T358 | 0.026829 |
| M1064T334 | 0.00010365 | M443T357 | 0.027027 |
| M968T283 | 0.00010365 | M946T287 | 0.027091 |
| M389T276_1 | 0.00010459 | M355T344 | 0.027237 |
| M470T276 | 0.00010524 | M1001T285 | 0.027237 |
| M748T659 | 0.00010644 | M121T373 | 0.027237 |
| M510T276 | 0.00010836 | M471T313 | 0.02724 |
| M997T276 | 0.00010898 | M356T325 | 0.02758 |
| M1267T388_1 | 0.00010898 | M904T470_2 | 0.028346 |
| M1226T285 | 0.00011117 | M1318T379 | 0.028346 |
| M1288T307_3 | 0.00011144 | M1189T350_1 | 0.028406 |
| M870T282 | 0.00011144 | M721T355 | 0.028406 |
| M979T288 | 0.00011161 | M1112T333 | 0.028755 |
| M477T273_2 | 0.00011161 | M242T68 | 0.028966 |
| M1247T381_1 | 0.00011161 | M528T381 | 0.029032 |
| M861T380_1 | 0.00011161 | M1045T378 | 0.029372 |
| M867T335 | 0.00011288 | M1194T424 | 0.029381 |
| M406T506 | 0.00011383 | M1224T286 | 0.02989 |
| M906T285 | 0.0001146 | M630T347 | 0.030044 |
| M1176T400 | 0.00011625 | M1418T343_2 | 0.030199 |
| M1246T380 | 0.00011651 | M865T321 | 0.030415 |
| M1139T400 | 0.00011788 | M812T67 | 0.030465 |
| M1249T325 | 0.00011942 | M831T395_2 | 0.030474 |
| M876T281_1 | 0.00011974 | M1027T354 | 0.030492 |
| M1439T306 | 0.00012057 | M315T594 | 0.030494 |
| M932T286 | 0.00012073 | M665T330 | 0.0306 |
| M1349T324_1 | 0.00012209 | M773T404 | 0.031007 |
| M727T282 | 0.00012294 | M460T583 | 0.031007 |
| M1406T311_1 | 0.0001246 | M777T352 | 0.031007 |
| M669T374_1 | 0.0001248 | M387T338 | 0.031191 |
| M1148T380_1 | 0.00012495 | M1419T344 | 0.031289 |
| M1324T300 | 0.00012495 | M95T56 | 0.03133 |
| M277T53 | 0.00012536 | M537T410 | 0.031474 |
| M811T279_2 | 0.00012653 | M354T428 | 0.031474 |
| M461T273 | 0.00012655 | M559T295 | 0.031596 |
| M1406T311_3 | 0.00012754 | M989T363 | 0.031604 |
| M932T290_2 | 0.00012868 | M787T390 | 0.031736 |
| M715T52 | 0.00012874 | M489T588 | 0.031859 |
| M1090T287 | 0.00012881 | M827T192 | 0.031886 |
| M830T667_1 | 0.00012881 | M232T112 | 0.032152 |
| M942T400_2 | 0.00012881 | M391T209 | 0.032152 |
| M512T644 | 0.00012881 | M637T50 | 0.032152 |
| M1247T381_2 | 0.00012911 | M574T315 | 0.032152 |
| M365T66 | 0.00013052 | M589T363 | 0.032194 |
| M1455T307_1 | 0.00013088 | M966T386 | 0.032349 |
| M1199T307_3 | 0.00013092 | M881T67 | 0.03238 |
| M56T293 | 0.00013093 | M357T331 | 0.03238 |
| M968T279 | 0.00013157 | M743T349_1 | 0.03238 |
| M737T332 | 0.00013247 | M961T344 | 0.03238 |
| M933T286_1 | 0.00013402 | M244T59 | 0.032442 |
| M1349T324_4 | 0.00013444 | M1266T331 | 0.032493 |
| M1037T286_1 | 0.00013965 | M1248T375 | 0.032587 |
| M1054T324_1 | 0.00014025 | M917T466 | 0.03274 |
| M1456T307 | 0.00014184 | M1165T436 | 0.032806 |
| M961T401 | 0.00014378 | M244T298 | 0.033194 |
| M900T323 | 0.00014521 | M720T66 | 0.033395 |
| M1079T325_2 | 0.00014596 | M1488T349 | 0.033462 |
| M495T52 | 0.00014624 | M1315T335 | 0.033524 |
| M476T273 | 0.00014693 | M828T192 | 0.033599 |
| M773T282_1 | 0.00014732 | M327T334 | 0.033633 |
| M911T286 | 0.00014817 | M1125T367_1 | 0.033634 |
| M390T536 | 0.00014914 | M760T302 | 0.033699 |
| M698T285_2 | 0.00014914 | M1443T357 | 0.034017 |
| M707T66 | 0.00015012 | M359T289 | 0.03404 |
| M565T586 | 0.00015059 | M770T287 | 0.034197 |
| M1250T317_3 | 0.00015125 | M493T285 | 0.034241 |
| M1348T324_1 | 0.00015125 | M840T420 | 0.034274 |
| M1225T287_2 | 0.00015151 | M1272T375 | 0.034428 |
| M626T277 | 0.00015357 | M1152T318 | 0.034463 |
| M430T333 | 0.00015386 | M513T583 | 0.034646 |
| M851T285 | 0.00015658 | M222T75 | 0.03468 |
| M868T335_1 | 0.0001589 | M1487T349 | 0.034751 |
| M765T580 | 0.00016204 | M652T66 | 0.034867 |
| M1118T285 | 0.00016204 | M1071T359 | 0.034867 |
| M1115T282 | 0.00016204 | M190T343 | 0.034917 |
| M666T419_2 | 0.00016421 | M839T387 | 0.034919 |
| M726T285 | 0.00016444 | M797T396 | 0.035452 |
| M654T345_1 | 0.00016455 | M615T346 | 0.03558 |
| M512T425_1 | 0.00016482 | M111T167 | 0.035632 |
| M783T51 | 0.00016542 | M1419T343 | 0.035694 |
| M567T429_1 | 0.00016995 | M209T391 | 0.035865 |
| M657T352 | 0.00017088 | M741T386 | 0.03597 |
| M1374T311_2 | 0.00017089 | M1271T375_2 | 0.035993 |
| M1093T285_2 | 0.00017271 | M558T282 | 0.0363 |
| M831T382_1 | 0.0001731 | M1011T362_2 | 0.0363 |
| M1350T323 | 0.00017349 | M133T72 | 0.0363 |
| M588T585 | 0.00017394 | M1334T378_2 | 0.036328 |
| M1005T312 | 0.00017394 | M317T289 | 0.036328 |
| M1162T392_1 | 0.00017394 | M492T375 | 0.036328 |
| M1128T344_1 | 0.00017835 | M792T404 | 0.036448 |
| M441T297 | 0.00017876 | M559T342 | 0.036516 |
| M886T382 | 0.0001806 | M827T167 | 0.036735 |
| M861T380_2 | 0.00018286 | M1486T349 | 0.036854 |
| M1177T400_2 | 0.00018702 | M285T593 | 0.037049 |
| M1244T666_2 | 0.00018788 | M887T334 | 0.037184 |
| M975T284 | 0.00019223 | M1219T347_2 | 0.037188 |
| M723T581 | 0.00019321 | M742T349 | 0.037188 |
| M373T360 | 0.00019321 | M1191T306 | 0.037188 |
| M1079T330 | 0.00019321 | M181T50 | 0.037482 |
| M494T423_1 | 0.00019368 | M720T357 | 0.037509 |
| M744T275 | 0.00019368 | M1219T347_1 | 0.03781 |
| M1160T392_4 | 0.0001938 | M1035T278 | 0.037983 |
| M984T281 | 0.00019541 | M719T66 | 0.038076 |
| M800T285_2 | 0.00020089 | M1342T289 | 0.038529 |
| M538T427_1 | 0.00020094 | M1052T330 | 0.038552 |
| M523T425_1 | 0.00020112 | M1190T349_1 | 0.038552 |
| M870T283_1 | 0.00020153 | M316T289 | 0.038552 |
| M962T401 | 0.00020153 | M1479T381 | 0.038552 |
| M547T428_1 | 0.00020728 | M327T64 | 0.038799 |
| M981T286_1 | 0.00020728 | M299T68 | 0.038879 |
| M1080T325_1 | 0.0002073 | M790T395 | 0.039164 |
| M275T53 | 0.0002073 | M1320T379 | 0.039368 |
| M1454T306_2 | 0.00020895 | M1399T402_2 | 0.039459 |
| M962T280_1 | 0.00020989 | M530T288 | 0.039477 |
| M1147T380 | 0.00021025 | M1074T315 | 0.039595 |
| M841T278 | 0.00021048 | M513T67 | 0.039652 |
| M1454T307_2 | 0.00021048 | M943T349 | 0.039791 |
| M1250T317_4 | 0.00021096 | M173T441 | 0.039818 |
| M871T282 | 0.00021096 | M791T403_2 | 0.039821 |
| M1225T286 | 0.00021106 | M1126T320 | 0.039821 |
| M1063T284_2 | 0.00021484 | M220T676 | 0.040343 |
| M1245T666_1 | 0.00021669 | M697T67 | 0.040619 |
| M930T285 | 0.00021669 | M1442T357 | 0.040619 |
| M596T277 | 0.00021788 | M1025T376_2 | 0.040879 |
| M1177T312 | 0.00021788 | M1418T343_1 | 0.041038 |
| M1119T286 | 0.00021788 | M282T290 | 0.041142 |
| M1244T666_1 | 0.00021791 | M1053T284 | 0.041274 |
| M1391T284_2 | 0.00022052 | M316T594 | 0.041645 |
| M642T396_1 | 0.00022407 | M421T67 | 0.041963 |
| M1119T283 | 0.00022483 | M618T672 | 0.042043 |
| M521T275_2 | 0.00022528 | M1174T343 | 0.042149 |
| M1226T287_1 | 0.00022613 | M873T159 | 0.04225 |
| M300T275 | 0.00022914 | M369T329 | 0.04231 |
| M759T283_2 | 0.00023008 | M1153T291 | 0.04231 |
| M1213T306 | 0.00023179 | M906T345 | 0.042326 |
| M1455T306 | 0.00023286 | M271T582 | 0.042439 |
| M1406T311_2 | 0.00023307 | M885T320 | 0.042727 |
| M818T392_1 | 0.00023311 | M836T470 | 0.042881 |
| M1265T325_4 | 0.0002344 | M832T395 | 0.042881 |
| M835T283 | 0.00023824 | M411T490 | 0.042881 |
| M1065T334_2 | 0.00023824 | M130T300 | 0.042918 |
| M820T350 | 0.00024059 | M659T284 | 0.04302 |
| M1172T310_3 | 0.00024158 | M215T59 | 0.04327 |
| M1058T335 | 0.00024158 | M886T333 | 0.043285 |
| M1349T303 | 0.00024159 | M330T285 | 0.044008 |
| M579T52 | 0.00024159 | M721T357 | 0.044008 |
| M654T345_2 | 0.00024171 | M905T346 | 0.044289 |
| M1288T308 | 0.00024457 | M289T62 | 0.04452 |
| M1349T324_2 | 0.00024623 | M551T288 | 0.044546 |
| M1177T311_1 | 0.00024647 | M721T66 | 0.044589 |
| M921T376_1 | 0.00024845 | M1218T347 | 0.044618 |
| M894T317_1 | 0.00024925 | M792T403 | 0.04494 |
| M699T285 | 0.00025096 | M127T419 | 0.04494 |
| M1177T400_1 | 0.00025337 | M1131T404 | 0.045438 |
| M951T388_2 | 0.00025852 | M1265T331 | 0.04552 |
| M1419T334_3 | 0.00026202 | M788T390_2 | 0.046051 |
| M785T400_1 | 0.00026482 | M278T312 | 0.04632 |
| M820T668_1 | 0.0002653 | M541T379 | 0.046401 |
| M634T583 | 0.00026833 | M583T68 | 0.046476 |
| M1173T311_1 | 0.00026904 | M540T67 | 0.046476 |
| M1078T335_3 | 0.00026904 | M618T400 | 0.046553 |
| M553T428_1 | 0.0002702 | M761T303_1 | 0.046776 |
| M1455T392_2 | 0.0002702 | M791T403_1 | 0.046874 |
| M113T56 | 0.0002702 | M295T276 | 0.046965 |
| M1348T324_2 | 0.00027333 | M187T299 | 0.047081 |
| M1454T306_1 | 0.00027345 | M1107T219 | 0.047116 |
| M1177T400_3 | 0.00027345 | M659T298 | 0.047269 |
| M1128T344_2 | 0.00027346 | M1175T344 | 0.047346 |
| M984T283 | 0.00027346 | M618T325 | 0.047522 |
| M831T382_2 | 0.00027374 | M758T365 | 0.047548 |
| M1419T334_1 | 0.00027402 | M631T90 | 0.047725 |
| M974T282 | 0.00027591 | M1167T302_1 | 0.047786 |
| M1076T303 | 0.00027591 | M1314T335 | 0.047786 |
| M532T427_2 | 0.00027703 | M934T295 | 0.047786 |
| M272T512 | 0.00027907 | M270T68 | 0.047786 |
| M1250T317_2 | 0.00027915 | M1242T288 | 0.048207 |
| M676T278 | 0.00028396 | M439T318 | 0.048427 |
| M213T273 | 0.00028982 | M539T67 | 0.048707 |
| M432T329 | 0.00029365 | M624T64 | 0.049072 |
| M407T341 | 0.00029452 | M900T336 | 0.049369 |
| M907T359_1 | 0.00029628 | M798T412 | 0.049598 |
| M1062T285_1 | 0.00029754 | M884T320 | 0.049598 |
| M1212T306_2 | 0.00029918 | M1360T335 | 0.049828 |
| M1227T392 | 0.00029918 |  |  |
| M865T635 | 0.00029955 |  |  |
| M766T580 | 0.00030042 |  |  |
| M1074T331 | 0.00030745 |  |  |
| M701T286 | 0.00030802 |  |  |
| M1177T400_4 | 0.00030846 |  |  |
| M1064T332 | 0.00030862 |  |  |
| M786T278 | 0.00031112 |  |  |
| M800T382 | 0.00031696 |  |  |
| M598T451 | 0.00031723 |  |  |
| M301T274 | 0.00032048 |  |  |
| M1476T316 | 0.00032122 |  |  |
| M497T275_2 | 0.00032133 |  |  |
| M521T277 | 0.00032239 |  |  |
| M730T389 | 0.00032387 |  |  |
| M1264T325 | 0.00032652 |  |  |
| M760T389 | 0.00032822 |  |  |
| M906T284_2 | 0.00033151 |  |  |
| M1230T316_2 | 0.00033179 |  |  |
| M1065T334_1 | 0.00033583 |  |  |
| M209T53 | 0.00033728 |  |  |
| M1204T370 | 0.00033871 |  |  |
| M1064T331 | 0.00033894 |  |  |
| M1120T286_1 | 0.00033924 |  |  |
| M1159T283 | 0.00034177 |  |  |
| M1172T310_2 | 0.00034344 |  |  |
| M641T396 | 0.00034604 |  |  |
| M427T52 | 0.00034808 |  |  |
| M1159T282 | 0.00034906 |  |  |
| M1419T334_2 | 0.00034906 |  |  |
| M1455T307_2 | 0.00035037 |  |  |
| M1250T317_1 | 0.00035154 |  |  |
| M460T402 | 0.00035171 |  |  |
| M626T284_1 | 0.00035171 |  |  |
| M511T52 | 0.00035209 |  |  |
| M939T283 | 0.00035209 |  |  |
| M157T274 | 0.00035298 |  |  |
| M707T278 | 0.00035398 |  |  |
| M1094T287_2 | 0.00035705 |  |  |
| M894T318 | 0.00035716 |  |  |
| M1418T334_2 | 0.00035848 |  |  |
| M1159T285 | 0.00036141 |  |  |
| M679T277_2 | 0.00036167 |  |  |
| M1171T311 | 0.0003642 |  |  |
| M99T62 | 0.00036665 |  |  |
| M653T345 | 0.00036742 |  |  |
| M187T382 | 0.00036921 |  |  |
| M1243T307_2 | 0.00037673 |  |  |
| M1062T285_2 | 0.0003796 |  |  |
| M1011T376_1 | 0.00039301 |  |  |
| M1166T275 | 0.00039337 |  |  |
| M932T288 | 0.00039406 |  |  |
| M1454T307_1 | 0.00039406 |  |  |
| M508T424 | 0.00039746 |  |  |
| M632T305 | 0.00040081 |  |  |
| M1251T284_3 | 0.0004014 |  |  |
| M1039T306_1 | 0.0004014 |  |  |
| M677T280 | 0.00040542 |  |  |
| M411T52_1 | 0.00041145 |  |  |
| M1163T391_1 | 0.00041187 |  |  |
| M731T284_1 | 0.00041689 |  |  |
| M815T281_1 | 0.00041762 |  |  |
| M529T383 | 0.00042313 |  |  |
| M422T275 | 0.00042364 |  |  |
| M638T67 | 0.00042595 |  |  |
| M1390T311 | 0.0004284 |  |  |
| M556T366 | 0.0004284 |  |  |
| M169T175 | 0.0004284 |  |  |
| M730T281_2 | 0.0004307 |  |  |
| M509T424_1 | 0.0004307 |  |  |
| M833T281_1 | 0.00043214 |  |  |
| M757T378 | 0.00043273 |  |  |
| M303T271 | 0.00043592 |  |  |
| M318T281 | 0.0004369 |  |  |
| M1212T305 | 0.00044295 |  |  |
| M410T275_2 | 0.0004444 |  |  |
| M547T275 | 0.00044967 |  |  |
| M359T52 | 0.00045039 |  |  |
| M450T507 | 0.00045107 |  |  |
| M1212T306_1 | 0.00045756 |  |  |
| M501T584 | 0.00046637 |  |  |
| M950T388_2 | 0.00046873 |  |  |
| M1212T307 | 0.00047278 |  |  |
| M862T335 | 0.00047318 |  |  |
| M850T281 | 0.00047318 |  |  |
| M861T376 | 0.00047426 |  |  |
| M346T273 | 0.00047451 |  |  |
| M1181T414 | 0.00047873 |  |  |
| M814T282_1 | 0.00048073 |  |  |
| M1065T306_1 | 0.00048188 |  |  |
| M558T579 | 0.00048367 |  |  |
| M513T275 | 0.00048367 |  |  |
| M554T364 | 0.00048404 |  |  |
| M464T319 | 0.00048521 |  |  |
| M847T395 | 0.00048697 |  |  |
| M981T286_2 | 0.00049314 |  |  |
| M872T281 | 0.00049476 |  |  |
| M915T307 | 0.00049695 |  |  |
| M547T276_1 | 0.00049852 |  |  |
| M672T374_1 | 0.00049951 |  |  |
| M663T52 | 0.00050397 |  |  |
| M620T373 | 0.00050397 |  |  |
| M214T273 | 0.00050397 |  |  |
| M1349T304 | 0.00050566 |  |  |
| M565T394 | 0.00050747 |  |  |
| M1350T303 | 0.00050747 |  |  |
| M1044T375 | 0.00050962 |  |  |
| M1065T334_3 | 0.00050962 |  |  |
| M951T388_3 | 0.0005126 |  |  |
| M257T663 | 0.00051342 |  |  |
| M980T283 | 0.0005149 |  |  |
| M1085T335_3 | 0.00052208 |  |  |
| M1085T335_4 | 0.00052295 |  |  |
| M1267T388_2 | 0.00052527 |  |  |
| M907T359_3 | 0.00052601 |  |  |
| M1155T282_2 | 0.00052601 |  |  |
| M1275T287 | 0.00052601 |  |  |
| M691T274 | 0.00053018 |  |  |
| M731T282 | 0.00053131 |  |  |
| M637T279 | 0.00053268 |  |  |
| M632T321 | 0.00053415 |  |  |
| M666T419_1 | 0.00053415 |  |  |
| M479T421 | 0.00053504 |  |  |
| M482T274 | 0.00053677 |  |  |
| M631T52 | 0.00053975 |  |  |
| M700T284_2 | 0.00053997 |  |  |
| M343T52 | 0.00054531 |  |  |
| M348T301 | 0.00054613 |  |  |
| M1093T286_1 | 0.00054847 |  |  |
| M1080T325_2 | 0.00054924 |  |  |
| M1086T335 | 0.00054963 |  |  |
| M1079T325_1 | 0.00054998 |  |  |
| M689T379_1 | 0.00055103 |  |  |
| M1243T306 | 0.00055103 |  |  |
| M981T285_1 | 0.00055128 |  |  |
| M595T280 | 0.00055131 |  |  |
| M829T67 | 0.00055295 |  |  |
| M1228T375 | 0.00055455 |  |  |
| M633T277 | 0.00055573 |  |  |
| M1049T376 | 0.00055573 |  |  |
| M230T505 | 0.00055573 |  |  |
| M882T282_1 | 0.00055749 |  |  |
| M1140T391_2 | 0.00056479 |  |  |
| M1323T302 | 0.0005681 |  |  |
| M589T585 | 0.00057296 |  |  |
| M1178T400_1 | 0.00057914 |  |  |
| M1074T275 | 0.00057989 |  |  |
| M969T451_1 | 0.00058063 |  |  |
| M1213T307_1 | 0.00058198 |  |  |
| M933T346_2 | 0.00058399 |  |  |
| M1265T325_5 | 0.00058426 |  |  |
| M749T280 | 0.00058455 |  |  |
| M963T280 | 0.00058455 |  |  |
| M1455T392_3 | 0.00058455 |  |  |
| M813T287 | 0.00058512 |  |  |
| M290T468 | 0.00058612 |  |  |
| M1450T392_2 | 0.00058843 |  |  |
| M586T273 | 0.00059129 |  |  |
| M811T278 | 0.00059129 |  |  |
| M785T279_1 | 0.00059246 |  |  |
| M1127T344 | 0.00059246 |  |  |
| M1008T373_1 | 0.0005939 |  |  |
| M632T276 | 0.0005971 |  |  |
| M1162T392_2 | 0.00059766 |  |  |
| M1477T317_1 | 0.00059922 |  |  |
| M1231T316 | 0.00060028 |  |  |
| M482T354 | 0.00060264 |  |  |
| M1148T380_2 | 0.00061147 |  |  |
| M799T284_2 | 0.00061876 |  |  |
| M1045T375 | 0.00061924 |  |  |
| M1459T392 | 0.00062241 |  |  |
| M1491T306_2 | 0.00062247 |  |  |
| M370T273 | 0.00062848 |  |  |
| M935T279 | 0.00062972 |  |  |
| M458T392 | 0.00062998 |  |  |
| M708T284_1 | 0.00062998 |  |  |
| M921T376_2 | 0.00063165 |  |  |
| M962T280_2 | 0.00063165 |  |  |
| M1158T310 | 0.00063263 |  |  |
| M1399T285 | 0.00063757 |  |  |
| M477T273_1 | 0.00063957 |  |  |
| M474T579 | 0.00064293 |  |  |
| M1226T287_2 | 0.00064414 |  |  |
| M682T283 | 0.00064502 |  |  |
| M846T395_2 | 0.00064718 |  |  |
| M955T287_2 | 0.00065245 |  |  |
| M1251T317_2 | 0.0006565 |  |  |
| M1042T317_3 | 0.0006565 |  |  |
| M548T274 | 0.0006565 |  |  |
| M954T283 | 0.00066137 |  |  |
| M1244T307 | 0.00066147 |  |  |
| M512T331 | 0.00066515 |  |  |
| M799T284_1 | 0.0006677 |  |  |
| M1445T335_2 | 0.0006709 |  |  |
| M577T333 | 0.00067483 |  |  |
| M1140T392_2 | 0.00067607 |  |  |
| M1004T311_2 | 0.00067915 |  |  |
| M1016T282 | 0.00067915 |  |  |
| M979T286 | 0.00067915 |  |  |
| M511T275_2 | 0.00068181 |  |  |
| M1085T335_2 | 0.00068228 |  |  |
| M1256T296 | 0.00068419 |  |  |
| M1491T306_1 | 0.00068419 |  |  |
| M729T278 | 0.00068717 |  |  |
| M1099T288 | 0.00068717 |  |  |
| M1013T67 | 0.0006875 |  |  |
| M503T274 | 0.0006875 |  |  |
| M955T288_2 | 0.00069366 |  |  |
| M1405T311_1 | 0.00070006 |  |  |
| M1159T284 | 0.00070475 |  |  |
| M517T425 | 0.00071335 |  |  |
| M585T404 | 0.00072001 |  |  |
| M483T423_1 | 0.00072119 |  |  |
| M555T364 | 0.00072215 |  |  |
| M1160T283_1 | 0.00072224 |  |  |
| M503T310 | 0.00072666 |  |  |
| M1128T345 | 0.0007278 |  |  |
| M1265T325_1 | 0.00073687 |  |  |
| M907T359_2 | 0.00074008 |  |  |
| M1391T284_1 | 0.00074313 |  |  |
| M643T417 | 0.00074409 |  |  |
| M415T68 | 0.00074559 |  |  |
| M624T277_2 | 0.00074679 |  |  |
| M665T419 | 0.00075446 |  |  |
| M875T280_2 | 0.0007579 |  |  |
| M1160T392_2 | 0.00076223 |  |  |
| M689T379_2 | 0.00076523 |  |  |
| M291T53 | 0.00077849 |  |  |
| M1172T310_1 | 0.00077849 |  |  |
| M567T429_2 | 0.00077849 |  |  |
| M1270T303 | 0.00078003 |  |  |
| M1476T317 | 0.00078112 |  |  |
| M1445T335_3 | 0.00078696 |  |  |
| M1246T379 | 0.00078983 |  |  |
| M951T388_4 | 0.00079084 |  |  |
| M1446T335_1 | 0.00079359 |  |  |
| M1042T317_2 | 0.00079359 |  |  |
| M1213T307_2 | 0.0007979 |  |  |
| M538T509 | 0.00080083 |  |  |
| M832T381 | 0.00080252 |  |  |
| M1040T307 | 0.0008027 |  |  |
| M207T53 | 0.0008027 |  |  |
| M217T285 | 0.0008027 |  |  |
| M1243T308 | 0.00080636 |  |  |
| M862T380 | 0.00080713 |  |  |
| M1084T335_1 | 0.00080759 |  |  |
| M1164T392 | 0.00080759 |  |  |
| M1007T373_1 | 0.00081529 |  |  |
| M1398T286_1 | 0.00082106 |  |  |
| M1446T335_2 | 0.00082704 |  |  |
| M846T395_1 | 0.0008307 |  |  |
| M1048T288 | 0.0008307 |  |  |
| M703T659 | 0.00083276 |  |  |
| M1446T335_3 | 0.00083416 |  |  |
| M1269T302_1 | 0.00083496 |  |  |
| M973T282 | 0.00083822 |  |  |
| M1265T325_2 | 0.0008383 |  |  |
| M923T317_1 | 0.0008383 |  |  |
| M173T108 | 0.00083883 |  |  |
| M1078T335_2 | 0.00083936 |  |  |
| M1115T286 | 0.00084034 |  |  |
| M692T280 | 0.00084082 |  |  |
| M464T305 | 0.00084121 |  |  |
| M1160T392_1 | 0.00084532 |  |  |
| M1120T284 | 0.00084625 |  |  |
| M524T275 | 0.00084765 |  |  |
| M960T280 | 0.00084765 |  |  |
| M632T279 | 0.00084765 |  |  |
| M1011T376_2 | 0.00084765 |  |  |
| M805T280 | 0.00084765 |  |  |
| M1159T392_2 | 0.00084886 |  |  |
| M787T280 | 0.00084999 |  |  |
| M1167T392 | 0.00084999 |  |  |
| M912T287 | 0.00085071 |  |  |
| M930T283_2 | 0.00085641 |  |  |
| M921T375 | 0.00085641 |  |  |
| M768T279_1 | 0.00085742 |  |  |
| M979T287 | 0.00085797 |  |  |
| M1450T392_3 | 0.00086555 |  |  |
| M798T279 | 0.00086737 |  |  |
| M319T277 | 0.00087743 |  |  |
| M1449T392_4 | 0.00088179 |  |  |
| M1450T392_1 | 0.0008823 |  |  |
| M475T275_1 | 0.00089817 |  |  |
| M736T369 | 0.0008993 |  |  |
| M1226T287_3 | 0.0008993 |  |  |
| M1074T332_1 | 0.00089945 |  |  |
| M660T277 | 0.00090423 |  |  |
| M1265T325_3 | 0.0009164 |  |  |
| M641T294 | 0.00092308 |  |  |
| M934T297 | 0.00092555 |  |  |
| M872T280 | 0.00092654 |  |  |
| M541T400 | 0.00092919 |  |  |
| M495T278 | 0.00093234 |  |  |
| M693T283 | 0.00093988 |  |  |
| M879T311_1 | 0.00094228 |  |  |
| M544T585 | 0.00095178 |  |  |
| M526T426 | 0.00095209 |  |  |
| M833T281_2 | 0.00095459 |  |  |
| M672T281 | 0.00095742 |  |  |
| M1039T307_2 | 0.00096848 |  |  |
| M790T363_2 | 0.00097278 |  |  |
| M1129T344 | 0.00097468 |  |  |
| M850T283_2 | 0.00097543 |  |  |
| M1055T319_1 | 0.00097563 |  |  |
| M1269T302_2 | 0.00097968 |  |  |
| M123T53 | 0.00097968 |  |  |
| M700T283 | 0.00097968 |  |  |
| M953T282_1 | 0.00098328 |  |  |
| M1115T400_1 | 0.00098559 |  |  |
| M729T279 | 0.000988 |  |  |
| M1116T286_2 | 0.00099748 |  |  |
| M1076T304 | 0.00099901 |  |  |
| M1019T285 | 0.0010038 |  |  |
| M1449T392_3 | 0.0010049 |  |  |
| M980T286 | 0.0010049 |  |  |
| M1373T311 | 0.0010056 |  |  |
| M723T280 | 0.0010056 |  |  |
| M1300T307_2 | 0.0010065 |  |  |
| M679T278 | 0.001007 |  |  |
| M1269T303_2 | 0.0010127 |  |  |
| M1116T286_1 | 0.0010131 |  |  |
| M332T273 | 0.0010131 |  |  |
| M1449T392_1 | 0.0010158 |  |  |
| M1193T288_2 | 0.0010323 |  |  |
| M1398T286_2 | 0.0010447 |  |  |
| M513T53 | 0.0010472 |  |  |
| M339T273 | 0.0010485 |  |  |
| M689T67 | 0.0010547 |  |  |
| M1217T315 | 0.0010644 |  |  |
| M520T275_2 | 0.0010658 |  |  |
| M594T279 | 0.0010658 |  |  |
| M774T400 | 0.0010675 |  |  |
| M582T277 | 0.0010713 |  |  |
| M448T333 | 0.0010719 |  |  |
| M836T658 | 0.0010766 |  |  |
| M963T279 | 0.0010771 |  |  |
| M1085T335_1 | 0.0010788 |  |  |
| M1213T309 | 0.0010849 |  |  |
| M1084T335_3 | 0.0010852 |  |  |
| M463T306 | 0.0010892 |  |  |
| M1398T286_3 | 0.0010894 |  |  |
| M405T323 | 0.0011034 |  |  |
| M1228T376 | 0.0011034 |  |  |
| M930T381 | 0.0011034 |  |  |
| M578T333 | 0.0011088 |  |  |
| M1005T311 | 0.0011104 |  |  |
| M939T284 | 0.0011122 |  |  |
| M1163T392 | 0.0011142 |  |  |
| M1448T392 | 0.0011143 |  |  |
| M1160T284 | 0.0011143 |  |  |
| M1451T392 | 0.0011163 |  |  |
| M1119T379 | 0.0011163 |  |  |
| M664T439 | 0.0011163 |  |  |
| M909T307_1 | 0.0011205 |  |  |
| M1093T286_2 | 0.0011314 |  |  |
| M615T277_2 | 0.0011314 |  |  |
| M908T432_2 | 0.0011314 |  |  |
| M1320T375 | 0.0011332 |  |  |
| M1094T286 | 0.0011405 |  |  |
| M1042T316 | 0.0011466 |  |  |
| M1449T392_2 | 0.0011474 |  |  |
| M1039T306_2 | 0.0011481 |  |  |
| M267T272 | 0.0011504 |  |  |
| M479T422 | 0.0011623 |  |  |
| M1321T375 | 0.0011628 |  |  |
| M672T374_2 | 0.0011809 |  |  |
| M1140T392_1 | 0.0011811 |  |  |
| M407T328 | 0.0011813 |  |  |
| M269T546 | 0.0011813 |  |  |
| M1043T317_1 | 0.0011864 |  |  |
| M745T275 | 0.0011889 |  |  |
| M1251T284_2 | 0.0011906 |  |  |
| M782T316 | 0.0011927 |  |  |
| M759T281 | 0.0011984 |  |  |
| M942T310 | 0.0012006 |  |  |
| M730T283 | 0.0012075 |  |  |
| M383T327_2 | 0.0012104 |  |  |
| M641T295 | 0.0012104 |  |  |
| M1155T282_1 | 0.0012104 |  |  |
| M933T286_2 | 0.0012164 |  |  |
| M825T281 | 0.0012222 |  |  |
| M728T306 | 0.0012275 |  |  |
| M926T385_2 | 0.0012301 |  |  |
| M1476T315 | 0.0012325 |  |  |
| M577T292 | 0.0012352 |  |  |
| M679T420 | 0.0012352 |  |  |
| M460T579 | 0.0012381 |  |  |
| M1131T278 | 0.0012472 |  |  |
| M1323T301_1 | 0.0012539 |  |  |
| M914T302 | 0.0012609 |  |  |
| M682T280_1 | 0.0012633 |  |  |
| M503T424_1 | 0.0012673 |  |  |
| M1231T317_2 | 0.0012792 |  |  |
| M461T274 | 0.0012856 |  |  |
| M955T287_1 | 0.0012863 |  |  |
| M671T281 | 0.0012919 |  |  |
| M989T280 | 0.0012941 |  |  |
| M611T280_2 | 0.0012988 |  |  |
| M1269T331_1 | 0.0012993 |  |  |
| M1159T391 | 0.0012993 |  |  |
| M1088T303_2 | 0.0013196 |  |  |
| M839T285 | 0.0013202 |  |  |
| M566T279 | 0.0013261 |  |  |
| M684T286_2 | 0.0013281 |  |  |
| M846T333 | 0.0013385 |  |  |
| M1040T306 | 0.0013399 |  |  |
| M628T276 | 0.0013418 |  |  |
| M1455T392_1 | 0.0013501 |  |  |
| M494T508 | 0.0013501 |  |  |
| M758T277 | 0.0013501 |  |  |
| M1186T311_2 | 0.0013504 |  |  |
| M1194T288_1 | 0.0013571 |  |  |
| M744T383 | 0.0013578 |  |  |
| M705T67 | 0.0013617 |  |  |
| M985T285 | 0.0013643 |  |  |
| M973T283 | 0.0013743 |  |  |
| M930T287 | 0.0013792 |  |  |
| M1266T387 | 0.0014041 |  |  |
| M374T559 | 0.0014106 |  |  |
| M674T66 | 0.0014243 |  |  |
| M1450T392_4 | 0.0014341 |  |  |
| M853T281 | 0.001439 |  |  |
| M849T285 | 0.001439 |  |  |
| M756T378 | 0.0014394 |  |  |
| M359T67 | 0.0014465 |  |  |
| M369T273 | 0.0014465 |  |  |
| M305T314 | 0.0014499 |  |  |
| M1366T287_2 | 0.0014515 |  |  |
| M1160T392_3 | 0.0014563 |  |  |
| M746T276 | 0.0014564 |  |  |
| M474T275_2 | 0.0014629 |  |  |
| M767T280 | 0.0014631 |  |  |
| M1269T331_2 | 0.0014666 |  |  |
| M708T66 | 0.0014688 |  |  |
| M494T281 | 0.0014748 |  |  |
| M815T281_2 | 0.0014871 |  |  |
| M714T280 | 0.0014883 |  |  |
| M1251T318 | 0.0014883 |  |  |
| M1177T311_2 | 0.0014925 |  |  |
| M1373T312_2 | 0.0014933 |  |  |
| M494T423_2 | 0.0014952 |  |  |
| M254T274 | 0.0014992 |  |  |
| M475T393 | 0.0015125 |  |  |
| M293T53 | 0.0015159 |  |  |
| M725T392_2 | 0.0015193 |  |  |
| M798T282 | 0.0015289 |  |  |
| M1372T300_2 | 0.0015289 |  |  |
| M1138T403 | 0.0015289 |  |  |
| M1088T303_1 | 0.0015328 |  |  |
| M864T327 | 0.0015328 |  |  |
| M791T389_1 | 0.001537 |  |  |
| M493T280 | 0.0015391 |  |  |
| M430T399 | 0.0015442 |  |  |
| M563T52 | 0.0015447 |  |  |
| M698T285_1 | 0.0015447 |  |  |
| M620T312 | 0.0015542 |  |  |
| M1270T304 | 0.0015621 |  |  |
| M1425T391_3 | 0.0015629 |  |  |
| M818T286 | 0.0015774 |  |  |
| M700T284_1 | 0.0015792 |  |  |
| M782T315 | 0.0015898 |  |  |
| M1445T335_1 | 0.0015994 |  |  |
| M587T273_2 | 0.0016041 |  |  |
| M615T659 | 0.0016054 |  |  |
| M893T317 | 0.0016083 |  |  |
| M1269T303_1 | 0.0016133 |  |  |
| M725T392_1 | 0.0016136 |  |  |
| M473T422 | 0.0016297 |  |  |
| M366T661 | 0.0016345 |  |  |
| M684T115 | 0.001643 |  |  |
| M481T317 | 0.0016436 |  |  |
| M552T277_2 | 0.0016564 |  |  |
| M1088T302 | 0.0016599 |  |  |
| M1007T373_2 | 0.0016599 |  |  |
| M994T291 | 0.001668 |  |  |
| M1425T391_2 | 0.0016705 |  |  |
| M844T350 | 0.0016858 |  |  |
| M1048T375 | 0.0016862 |  |  |
| M512T405_1 | 0.0016919 |  |  |
| M504T274_1 | 0.0017017 |  |  |
| M981T285_2 | 0.0017036 |  |  |
| M1130T361 | 0.0017177 |  |  |
| M725T285 | 0.0017225 |  |  |
| M907T288 | 0.0017286 |  |  |
| M739T280 | 0.0017529 |  |  |
| M567T276 | 0.0017539 |  |  |
| M402T342 | 0.0017539 |  |  |
| M499T321 | 0.0017618 |  |  |
| M751T284_1 | 0.0017619 |  |  |
| M1065T306_2 | 0.0017749 |  |  |
| M1371T300 | 0.0017769 |  |  |
| M246T341 | 0.0017774 |  |  |
| M331T274_2 | 0.0017782 |  |  |
| M1140T391_1 | 0.0017787 |  |  |
| M1373T312_1 | 0.0017808 |  |  |
| M909T307_2 | 0.0017814 |  |  |
| M933T307_1 | 0.0017826 |  |  |
| M645T277_1 | 0.0017842 |  |  |
| M892T279 | 0.0017849 |  |  |
| M723T279 | 0.0017928 |  |  |
| M945T282 | 0.001793 |  |  |
| M1030T373_1 | 0.0017946 |  |  |
| M100T293 | 0.0017948 |  |  |
| M1116T284 | 0.0017964 |  |  |
| M846T334 | 0.0017974 |  |  |
| M757T281_2 | 0.0017988 |  |  |
| M1118T379_3 | 0.0018037 |  |  |
| M823T287_2 | 0.0018123 |  |  |
| M921T376_3 | 0.0018145 |  |  |
| M923T317_2 | 0.0018145 |  |  |
| M1094T287_1 | 0.0018169 |  |  |
| M555T279 | 0.0018169 |  |  |
| M1020T286_2 | 0.001817 |  |  |
| M712T374 | 0.001838 |  |  |
| M409T275_1 | 0.0018402 |  |  |
| M1366T287_3 | 0.0018412 |  |  |
| M871T281 | 0.0018477 |  |  |
| M722T581 | 0.0018558 |  |  |
| M528T274 | 0.0018558 |  |  |
| M330T559 | 0.0018577 |  |  |
| M1453T392_1 | 0.0018601 |  |  |
| M1084T335_2 | 0.0018612 |  |  |
| M910T307 | 0.0018752 |  |  |
| M918T400 | 0.0018882 |  |  |
| M681T281_3 | 0.0018882 |  |  |
| M1436T335_2 | 0.0018944 |  |  |
| M262T59 | 0.0018953 |  |  |
| M1078T335_1 | 0.0019031 |  |  |
| M785T400_2 | 0.0019046 |  |  |
| M449T334 | 0.001907 |  |  |
| M1200T299_3 | 0.0019075 |  |  |
| M881T298 | 0.0019082 |  |  |
| M1425T391_1 | 0.001919 |  |  |
| M1148T381 | 0.0019324 |  |  |
| M672T373 | 0.0019324 |  |  |
| M544T346 | 0.0019423 |  |  |
| M910T306 | 0.001948 |  |  |
| M677T279 | 0.0019543 |  |  |
| M560T274 | 0.0019543 |  |  |
| M992T289 | 0.0019621 |  |  |
| M1360T306 | 0.0019621 |  |  |
| M644T417_1 | 0.0019788 |  |  |
| M1423T311_1 | 0.0019928 |  |  |
| M797T282 | 0.0019994 |  |  |
| M1187T311_1 | 0.0019994 |  |  |
| M621T416 | 0.0019994 |  |  |
| M743T383 | 0.0019994 |  |  |
| M1342T331_3 | 0.002004 |  |  |
| M744T277 | 0.0020045 |  |  |
| M125T53 | 0.0020048 |  |  |
| M101T293 | 0.0020125 |  |  |
| M481T354 | 0.0020316 |  |  |
| M519T398 | 0.0020391 |  |  |
| M1371T297 | 0.0020465 |  |  |
| M757T280 | 0.0020599 |  |  |
| M1350T304 | 0.0020717 |  |  |
| M1319T375 | 0.0020834 |  |  |
| M1424T310 | 0.0020849 |  |  |
| M880T658 | 0.0020854 |  |  |
| M245T373 | 0.0020964 |  |  |
| M890T312 | 0.0020964 |  |  |
| M1447T335_1 | 0.0021054 |  |  |
| M1374T311_1 | 0.0021054 |  |  |
| M482T423 | 0.0021068 |  |  |
| M633T279 | 0.0021163 |  |  |
| M890T311 | 0.0021176 |  |  |
| M1243T307_1 | 0.0021192 |  |  |
| M800T285_1 | 0.0021207 |  |  |
| M1078T336 | 0.0021318 |  |  |
| M913T412_3 | 0.0021327 |  |  |
| M772T280 | 0.0021331 |  |  |
| M809T307_1 | 0.0021451 |  |  |
| M1087T303 | 0.0021586 |  |  |
| M478T273 | 0.0021592 |  |  |
| M684T67 | 0.0021675 |  |  |
| M869T281 | 0.0021805 |  |  |
| M938T285 | 0.0021882 |  |  |
| M1120T286_2 | 0.0021985 |  |  |
| M345T272 | 0.0022083 |  |  |
| M1186T389 | 0.0022191 |  |  |
| M916T312_1 | 0.0022311 |  |  |
| M799T285 | 0.0022311 |  |  |
| M656T352 | 0.0022369 |  |  |
| M722T278 | 0.0022483 |  |  |
| M319T585 | 0.0022513 |  |  |
| M867T67 | 0.0022566 |  |  |
| M691T277 | 0.0022586 |  |  |
| M633T321 | 0.0022635 |  |  |
| M497T424_1 | 0.0022739 |  |  |
| M909T281 | 0.0022764 |  |  |
| M1161T392 | 0.0022764 |  |  |
| M56T67 | 0.0022764 |  |  |
| M1030T312_2 | 0.0022764 |  |  |
| M707T277 | 0.0022764 |  |  |
| M1200T299_2 | 0.0022864 |  |  |
| M436T276 | 0.0022895 |  |  |
| M1342T331_4 | 0.0022949 |  |  |
| M1176T393 | 0.0023049 |  |  |
| M1186T390 | 0.0023109 |  |  |
| M629T278 | 0.0023243 |  |  |
| M474T422_1 | 0.0023243 |  |  |
| M622T416 | 0.0023243 |  |  |
| M908T281_2 | 0.0023397 |  |  |
| M1070T373 | 0.0023397 |  |  |
| M1116T286_3 | 0.0023569 |  |  |
| M465T421_1 | 0.0023626 |  |  |
| M492T342 | 0.0023626 |  |  |
| M902T283 | 0.0023718 |  |  |
| M394T334 | 0.0023889 |  |  |
| M479T52 | 0.0023924 |  |  |
| M990T364 | 0.0023959 |  |  |
| M1273T387_1 | 0.002412 |  |  |
| M742T383 | 0.0024154 |  |  |
| M714T372_1 | 0.0024236 |  |  |
| M1343T331_1 | 0.0024418 |  |  |
| M631T279_2 | 0.0024424 |  |  |
| M988T280 | 0.0024458 |  |  |
| M671T374 | 0.0024458 |  |  |
| M1186T311_3 | 0.0024465 |  |  |
| M404T323 | 0.0024578 |  |  |
| M666T276 | 0.0024657 |  |  |
| M1399T287 | 0.0024935 |  |  |
| M718T394 | 0.0024961 |  |  |
| M1061T286 | 0.0024978 |  |  |
| M966T392_3 | 0.0025076 |  |  |
| M722T279_2 | 0.002514 |  |  |
| M1399T286 | 0.0025271 |  |  |
| M1030T312_1 | 0.0025286 |  |  |
| M861T413_1 | 0.002539 |  |  |
| M124T128 | 0.0025443 |  |  |
| M643T292 | 0.0025735 |  |  |
| M1069T280 | 0.0025739 |  |  |
| M854T283 | 0.0025842 |  |  |
| M1281T396 | 0.0026077 |  |  |
| M966T392_2 | 0.0026168 |  |  |
| M1372T300_1 | 0.0026368 |  |  |
| M861T279 | 0.0026662 |  |  |
| M846T303 | 0.0026662 |  |  |
| M949T282_3 | 0.0026664 |  |  |
| M1423T311_2 | 0.0026664 |  |  |
| M1453T392_2 | 0.0026782 |  |  |
| M376T276 | 0.0026799 |  |  |
| M1049T408 | 0.0026799 |  |  |
| M882T390_1 | 0.0026823 |  |  |
| M1030T311 | 0.0026858 |  |  |
| M690T275 | 0.0026865 |  |  |
| M400T565 | 0.0026938 |  |  |
| M1423T311_4 | 0.0027039 |  |  |
| M861T413_2 | 0.0027182 |  |  |
| M670T278 | 0.0027182 |  |  |
| M1066T306_1 | 0.0027189 |  |  |
| M967T392_1 | 0.0027264 |  |  |
| M1423T311_3 | 0.0027442 |  |  |
| M551T278 | 0.0027697 |  |  |
| M994T292_1 | 0.0027711 |  |  |
| M1012T278 | 0.0027721 |  |  |
| M670T276 | 0.002786 |  |  |
| M1342T331_2 | 0.0027886 |  |  |
| M1091T285 | 0.0027912 |  |  |
| M1077T335 | 0.0027956 |  |  |
| M641T343 | 0.0028203 |  |  |
| M829T392_2 | 0.0028208 |  |  |
| M311T278 | 0.0028208 |  |  |
| M704T352 | 0.0028958 |  |  |
| M448T278 | 0.0029279 |  |  |
| M584T276 | 0.002929 |  |  |
| M1010T375 | 0.0029679 |  |  |
| M486T311 | 0.0029947 |  |  |
| M909T277 | 0.0029962 |  |  |
| M846T332 | 0.0029962 |  |  |
| M826T281 | 0.0030273 |  |  |
| M357T272 | 0.0030309 |  |  |
| M667T67 | 0.0030343 |  |  |
| M745T278 | 0.0030343 |  |  |
| M639T281 | 0.0030398 |  |  |
| M381T66 | 0.0030431 |  |  |
| M992T275 | 0.0030518 |  |  |
| M1017T311_1 | 0.0030682 |  |  |
| M302T67_2 | 0.003076 |  |  |
| M504T331 | 0.003086 |  |  |
| M136T270 | 0.003094 |  |  |
| M300T514 | 0.003106 |  |  |
| M373T311 | 0.003117 |  |  |
| M750T282 | 0.0031366 |  |  |
| M737T274 | 0.003152 |  |  |
| M240T301 | 0.0031546 |  |  |
| M731T284_2 | 0.0031618 |  |  |
| M869T280 | 0.0031624 |  |  |
| M504T274_2 | 0.0031628 |  |  |
| M796T316_1 | 0.0031628 |  |  |
| M882T298 | 0.0031773 |  |  |
| M722T279_1 | 0.0031792 |  |  |
| M600T67 | 0.0031917 |  |  |
| M322T280 | 0.0031951 |  |  |
| M738T278_2 | 0.0032088 |  |  |
| M1048T287_1 | 0.0032138 |  |  |
| M479T279 | 0.0032186 |  |  |
| M800T420 | 0.0032214 |  |  |
| M700T284_3 | 0.0032315 |  |  |
| M475T275_2 | 0.0032494 |  |  |
| M1191T344 | 0.0032581 |  |  |
| M166T288 | 0.0032599 |  |  |
| M897T354 | 0.0032606 |  |  |
| M699T51 | 0.0032726 |  |  |
| M272T67 | 0.0032776 |  |  |
| M1039T281 | 0.0033001 |  |  |
| M346T360 | 0.0033167 |  |  |
| M681T281_1 | 0.0033331 |  |  |
| M1200T299_1 | 0.0033409 |  |  |
| M1070T279 | 0.0033417 |  |  |
| M613T276_1 | 0.0033452 |  |  |
| M356T565 | 0.0033512 |  |  |
| M694T370 | 0.003359 |  |  |
| M1227T375_2 | 0.0033635 |  |  |
| M564T274 | 0.0033716 |  |  |
| M481T278 | 0.0033882 |  |  |
| M614T276_2 | 0.0033946 |  |  |
| M606T450 | 0.0034228 |  |  |
| M492T273_1 | 0.0034243 |  |  |
| M261T317 | 0.0034318 |  |  |
| M468T422_1 | 0.0034403 |  |  |
| M701T287_1 | 0.0034442 |  |  |
| M1118T379_2 | 0.0034537 |  |  |
| M555T361 | 0.0034645 |  |  |
| M879T311_2 | 0.0035133 |  |  |
| M513T273 | 0.0035329 |  |  |
| M704T659 | 0.0035387 |  |  |
| M756T280_2 | 0.0035687 |  |  |
| M496T593 | 0.0035733 |  |  |
| M747T659 | 0.0036064 |  |  |
| M913T412_1 | 0.0036187 |  |  |
| M1477T317_2 | 0.003621 |  |  |
| M909T282 | 0.0036232 |  |  |
| M905T278_1 | 0.0036386 |  |  |
| M895T338_1 | 0.0036445 |  |  |
| M411T277 | 0.0036445 |  |  |
| M1074T332_2 | 0.0036567 |  |  |
| M712T389_2 | 0.00367 |  |  |
| M757T278 | 0.0036712 |  |  |
| M239T301 | 0.0037115 |  |  |
| M582T324 | 0.0037174 |  |  |
| M986T284_1 | 0.0037174 |  |  |
| M431T59 | 0.0037264 |  |  |
| M382T66 | 0.0037264 |  |  |
| M967T393 | 0.0037952 |  |  |
| M922T282 | 0.0038281 |  |  |
| M1160T283_2 | 0.0038479 |  |  |
| M1158T305 | 0.0038621 |  |  |
| M829T284 | 0.0038873 |  |  |
| M649T67 | 0.0039167 |  |  |
| M932T307 | 0.0039243 |  |  |
| M487T311 | 0.003943 |  |  |
| M868T343 | 0.0039664 |  |  |
| M656T298 | 0.003997 |  |  |
| M948T280 | 0.003998 |  |  |
| M492T273_2 | 0.0040001 |  |  |
| M1115T400_2 | 0.0040175 |  |  |
| M661T375_2 | 0.0040468 |  |  |
| M993T294 | 0.0040484 |  |  |
| M1454T392_2 | 0.0040484 |  |  |
| M299T273 | 0.0040484 |  |  |
| M448T274 | 0.0040484 |  |  |
| M1181T398 | 0.0041014 |  |  |
| M895T339 | 0.0041212 |  |  |
| M668T318 | 0.0041212 |  |  |
| M1252T284_1 | 0.0041554 |  |  |
| M839T286 | 0.0041561 |  |  |
| M671T278_1 | 0.0041671 |  |  |
| M1165T287 | 0.0041822 |  |  |
| M1193T288_1 | 0.0041822 |  |  |
| M1254T318_2 | 0.0041988 |  |  |
| M191T53 | 0.0042278 |  |  |
| M1186T311_1 | 0.0042307 |  |  |
| M1048T287_2 | 0.0042577 |  |  |
| M711T389_2 | 0.0042767 |  |  |
| M622T285 | 0.0042767 |  |  |
| M701T382 | 0.0042767 |  |  |
| M1166T292 | 0.0042773 |  |  |
| M203T46 | 0.0042787 |  |  |
| M425T382 | 0.0042787 |  |  |
| M472T305 | 0.0042944 |  |  |
| M535T60 | 0.0043071 |  |  |
| M752T443 | 0.0043077 |  |  |
| M1454T392_3 | 0.004332 |  |  |
| M767T278 | 0.0043542 |  |  |
| M1266T404_4 | 0.0043608 |  |  |
| M631T278 | 0.0043617 |  |  |
| M917T399 | 0.0043734 |  |  |
| M632T280 | 0.0043734 |  |  |
| M545T280 | 0.0043801 |  |  |
| M1010T376 | 0.0043801 |  |  |
| M956T286 | 0.0043898 |  |  |
| M661T375_1 | 0.0043976 |  |  |
| M649T279 | 0.0044139 |  |  |
| M601T67 | 0.0044234 |  |  |
| M1163T391_2 | 0.0044337 |  |  |
| M552T275 | 0.0044337 |  |  |
| M1079T335 | 0.0044337 |  |  |
| M494T280 | 0.0044337 |  |  |
| M801T289 | 0.0044469 |  |  |
| M195T289 | 0.0044476 |  |  |
| M1266T404_3 | 0.0044476 |  |  |
| M947T275 | 0.0044577 |  |  |
| M1453T392_3 | 0.0044614 |  |  |
| M945T281 | 0.0044672 |  |  |
| M1142T411 | 0.0044793 |  |  |
| M882T391 | 0.0044968 |  |  |
| M543T295 | 0.0045189 |  |  |
| M553T275_1 | 0.0045252 |  |  |
| M699T287 | 0.0045489 |  |  |
| M1266T404_1 | 0.0045506 |  |  |
| M1437T335_2 | 0.0045662 |  |  |
| M987T396_3 | 0.0045833 |  |  |
| M912T388_2 | 0.0045968 |  |  |
| M723T66 | 0.0045996 |  |  |
| M299T272 | 0.0046061 |  |  |
| M707T336 | 0.0046565 |  |  |
| M916T313 | 0.0046569 |  |  |
| M660T659 | 0.0047321 |  |  |
| M497T395 | 0.0047493 |  |  |
| M795T316 | 0.0047636 |  |  |
| M935T278 | 0.0047687 |  |  |
| M711T389_1 | 0.0048009 |  |  |
| M758T276 | 0.0048009 |  |  |
| M702T291 | 0.0048089 |  |  |
| M913T412_2 | 0.0048166 |  |  |
| M920T279 | 0.0048397 |  |  |
| M712T389_1 | 0.0048493 |  |  |
| M628T278 | 0.0048712 |  |  |
| M603T277 | 0.0049138 |  |  |
| M912T412_2 | 0.0049362 |  |  |
| M1119T337 | 0.0049362 |  |  |
| M539T409 | 0.0049545 |  |  |
| M682T278 | 0.0049676 |  |  |
| M1066T306_2 | 0.0049987 |  |  |
| M946T281 | 0.0049987 |  |  |
| M1022T279 | 0.0050007 |  |  |
| M666T383 | 0.0050013 |  |  |
| M203T60 | 0.0050329 |  |  |
| M910T398 | 0.0050378 |  |  |
| M1049T288_2 | 0.0050478 |  |  |
| M975T285 | 0.0050666 |  |  |
| M1176T390 | 0.00507 |  |  |
| M1005T276 | 0.0051741 |  |  |
| M723T335 | 0.005184 |  |  |
| M219T59 | 0.0051948 |  |  |
| M796T274 | 0.0051996 |  |  |
| M359T276 | 0.0052198 |  |  |
| M829T306_1 | 0.0052198 |  |  |
| M1167T390 | 0.0052315 |  |  |
| M531T273 | 0.0052406 |  |  |
| M1254T318_1 | 0.0052414 |  |  |
| M987T396_1 | 0.0052414 |  |  |
| M469T275 | 0.0052414 |  |  |
| M684T286_1 | 0.0052414 |  |  |
| M534T408 | 0.0052488 |  |  |
| M687T280 | 0.0052537 |  |  |
| M1242T305 | 0.0052537 |  |  |
| M887T382 | 0.0052586 |  |  |
| M866T282 | 0.0052586 |  |  |
| M912T388_1 | 0.0052586 |  |  |
| M1067T389_1 | 0.0052647 |  |  |
| M260T292 | 0.0052802 |  |  |
| M801T420 | 0.0052845 |  |  |
| M1316T396_1 | 0.0052845 |  |  |
| M503T275_2 | 0.0053112 |  |  |
| M1061T287_3 | 0.0053393 |  |  |
| M559T275 | 0.0053498 |  |  |
| M912T387_2 | 0.0053549 |  |  |
| M736T333 | 0.0053704 |  |  |
| M711T388 | 0.0053739 |  |  |
| M873T373 | 0.0053839 |  |  |
| M1093T285_1 | 0.0054062 |  |  |
| M1089T335_1 | 0.0054332 |  |  |
| M505T331 | 0.0054441 |  |  |
| M738T275 | 0.0054531 |  |  |
| M512T274_1 | 0.0054626 |  |  |
| M1437T335_1 | 0.0054818 |  |  |
| M736T273 | 0.0054866 |  |  |
| M861T296 | 0.0055164 |  |  |
| M763T281 | 0.0055164 |  |  |
| M433T277 | 0.0055164 |  |  |
| M776T277_2 | 0.0055203 |  |  |
| M843T350_2 | 0.0055261 |  |  |
| M1296T399 | 0.0055416 |  |  |
| M957T280 | 0.0055531 |  |  |
| M556T410_2 | 0.0055897 |  |  |
| M791T389_2 | 0.0056001 |  |  |
| M1123T343 | 0.0056032 |  |  |
| M958T283 | 0.0056067 |  |  |
| M839T287 | 0.0056372 |  |  |
| M861T328 | 0.0056495 |  |  |
| M753T356_1 | 0.0057394 |  |  |
| M1013T403 | 0.0057601 |  |  |
| M577T281 | 0.0058236 |  |  |
| M302T336 | 0.0058298 |  |  |
| M915T276 | 0.0058558 |  |  |
| M838T286 | 0.0058815 |  |  |
| M1014T359 | 0.0058873 |  |  |
| M792T280 | 0.005917 |  |  |
| M983T408_2 | 0.0059343 |  |  |
| M875T280_1 | 0.0059495 |  |  |
| M1492T303_1 | 0.0059683 |  |  |
| M932T290_1 | 0.0060356 |  |  |
| M624T363 | 0.0060491 |  |  |
| M1215T388 | 0.0060512 |  |  |
| M1360T309 | 0.0060694 |  |  |
| M846T302 | 0.0060799 |  |  |
| M1323T301_2 | 0.0061016 |  |  |
| M1181T399 | 0.0061176 |  |  |
| M494T370 | 0.0061308 |  |  |
| M244T67 | 0.0062275 |  |  |
| M226T63 | 0.0062557 |  |  |
| M1454T392_1 | 0.0062983 |  |  |
| M415T59 | 0.0063075 |  |  |
| M790T386 | 0.006352 |  |  |
| M531T275 | 0.0063526 |  |  |
| M791T388 | 0.0063526 |  |  |
| M519T276 | 0.0063794 |  |  |
| M464T421 | 0.0064699 |  |  |
| M571T659 | 0.0064699 |  |  |
| M515T349 | 0.0064782 |  |  |
| M167T288 | 0.0065155 |  |  |
| M697T583 | 0.0065272 |  |  |
| M796T279 | 0.0065571 |  |  |
| M659T659 | 0.0065571 |  |  |
| M860T374 | 0.0065795 |  |  |
| M246T291 | 0.0065795 |  |  |
| M701T287_2 | 0.0065795 |  |  |
| M726T286 | 0.0065795 |  |  |
| M936T281 | 0.0065795 |  |  |
| M897T385_2 | 0.0066228 |  |  |
| M404T301 | 0.0066228 |  |  |
| M560T363 | 0.0066322 |  |  |
| M609T585 | 0.006647 |  |  |
| M889T281 | 0.006657 |  |  |
| M1369T412_1 | 0.0066845 |  |  |
| M829T307 | 0.006694 |  |  |
| M825T278 | 0.0068122 |  |  |
| M563T402 | 0.0068501 |  |  |
| M696T281_1 | 0.0068727 |  |  |
| M825T283 | 0.0068739 |  |  |
| M753T356_2 | 0.0069059 |  |  |
| M999T365 | 0.0069337 |  |  |
| M822T279 | 0.0070939 |  |  |
| M994T292_2 | 0.0071023 |  |  |
| M946T282_1 | 0.0071032 |  |  |
| M745T385 | 0.0071631 |  |  |
| M813T284 | 0.0071646 |  |  |
| M849T284 | 0.0071777 |  |  |
| M824T388_1 | 0.0071783 |  |  |
| M660T329 | 0.0071783 |  |  |
| M1268T387 | 0.0071783 |  |  |
| M363T331 | 0.0071783 |  |  |
| M916T312_2 | 0.0072606 |  |  |
| M779T343 | 0.0073075 |  |  |
| M367T276 | 0.0073233 |  |  |
| M484T276 | 0.0073233 |  |  |
| M836T321 | 0.0073295 |  |  |
| M469T292 | 0.0073316 |  |  |
| M1367T287 | 0.0073392 |  |  |
| M478T298 | 0.0073852 |  |  |
| M967T278 | 0.0074519 |  |  |
| M912T412_1 | 0.0074831 |  |  |
| M1037T359 | 0.0074831 |  |  |
| M407T305 | 0.0074831 |  |  |
| M898T385_1 | 0.0074831 |  |  |
| M552T277_1 | 0.0075017 |  |  |
| M774T283 | 0.0075132 |  |  |
| M741T581 | 0.0075132 |  |  |
| M1037T360 | 0.0075366 |  |  |
| M967T392_2 | 0.0075415 |  |  |
| M760T281 | 0.0075415 |  |  |
| M488T423 | 0.0075636 |  |  |
| M828T276 | 0.0075854 |  |  |
| M961T339 | 0.0075854 |  |  |
| M533T275 | 0.0075941 |  |  |
| M810T289_2 | 0.0076443 |  |  |
| M471T301 | 0.0076761 |  |  |
| M1166T391 | 0.0076795 |  |  |
| M589T338 | 0.0076795 |  |  |
| M1161T291_2 | 0.0077113 |  |  |
| M423T343 | 0.0077412 |  |  |
| M911T389 | 0.0077412 |  |  |
| M898T385_2 | 0.0078629 |  |  |
| M459T276 | 0.0079021 |  |  |
| M907T287 | 0.0079171 |  |  |
| M1066T389_2 | 0.0079222 |  |  |
| M637T382 | 0.0079252 |  |  |
| M502T275 | 0.007961 |  |  |
| M203T294 | 0.0079708 |  |  |
| M599T414 | 0.0079791 |  |  |
| M917T365 | 0.0079854 |  |  |
| M1453T392_4 | 0.0080817 |  |  |
| M947T336 | 0.0080956 |  |  |
| M808T366 | 0.0081177 |  |  |
| M209T310 | 0.0081333 |  |  |
| M534T275_4 | 0.0081645 |  |  |
| M779T287 | 0.0081791 |  |  |
| M763T371 | 0.0081959 |  |  |
| M347T273 | 0.0081959 |  |  |
| M260T386 | 0.0082174 |  |  |
| M827T276 | 0.0082847 |  |  |
| M1114T362 | 0.0083043 |  |  |
| M582T325 | 0.0083043 |  |  |
| M525T375 | 0.0083043 |  |  |
| M546T276_1 | 0.0083108 |  |  |
| M660T375_1 | 0.0083657 |  |  |
| M1112T368 | 0.0083823 |  |  |
| M668T369 | 0.0083823 |  |  |
| M495T274 | 0.0084143 |  |  |
| M962T339 | 0.0084219 |  |  |
| M437T579 | 0.0084555 |  |  |
| M528T382 | 0.0084803 |  |  |
| M862T413_1 | 0.008515 |  |  |
| M669T278 | 0.008515 |  |  |
| M491T273 | 0.0085346 |  |  |
| M631T307 | 0.0085346 |  |  |
| M270T540 | 0.0085524 |  |  |
| M631T279_1 | 0.0085747 |  |  |
| M922T332_2 | 0.0085867 |  |  |
| M718T279 | 0.0085867 |  |  |
| M754T281 | 0.0085973 |  |  |
| M719T394 | 0.0087124 |  |  |
| M756T280_1 | 0.0087147 |  |  |
| M1230T312 | 0.0087528 |  |  |
| M704T283 | 0.0088011 |  |  |
| M404T274 | 0.0088113 |  |  |
| M1049T288_3 | 0.0088153 |  |  |
| M566T281 | 0.0088454 |  |  |
| M1061T287_2 | 0.0088454 |  |  |
| M366T325 | 0.0088821 |  |  |
| M440T312 | 0.0089392 |  |  |
| M886T279 | 0.0089715 |  |  |
| M590T276 | 0.0089719 |  |  |
| M1107T281_1 | 0.0089719 |  |  |
| M727T277 | 0.008976 |  |  |
| M797T283 | 0.008976 |  |  |
| M782T277 | 0.0089835 |  |  |
| M273T67 | 0.0089902 |  |  |
| M688T345 | 0.0090329 |  |  |
| M173T70 | 0.0090555 |  |  |
| M1122T285 | 0.0090927 |  |  |
| M592T276 | 0.0091246 |  |  |
| M446T69 | 0.0091481 |  |  |
| M647T67 | 0.0091481 |  |  |
| M622T399 | 0.0091785 |  |  |
| M525T361 | 0.009192 |  |  |
| M614T276_1 | 0.0092615 |  |  |
| M1047T375 | 0.0092674 |  |  |
| M255T555 | 0.0092771 |  |  |
| M853T280 | 0.0092914 |  |  |
| M803T279 | 0.0092914 |  |  |
| M70T275 | 0.0092973 |  |  |
| M296T279 | 0.0093118 |  |  |
| M1138T281 | 0.0093565 |  |  |
| M1343T331_2 | 0.0093989 |  |  |
| M459T345_1 | 0.0094278 |  |  |
| M1049T288_1 | 0.0094612 |  |  |
| M1266T404_2 | 0.0094612 |  |  |
| M898T386 | 0.0094751 |  |  |
| M992T290 | 0.0095024 |  |  |
| M473T275 | 0.0095493 |  |  |
| M784T390 | 0.0095586 |  |  |
| M411T275_2 | 0.0096337 |  |  |
| M228T541 | 0.0096765 |  |  |
| M841T277 | 0.0097691 |  |  |
| M761T389 | 0.0099228 |  |  |
| M1066T389_1 | 0.0099607 |  |  |
| M829T303 | 0.0099768 |  |  |
| M1353T324_3 | 0.010055 |  |  |
| M724T292 | 0.01006 |  |  |
| M727T278 | 0.010108 |  |  |
| M753T293 | 0.010149 |  |  |
| M610T372 | 0.010192 |  |  |
| M946T282_2 | 0.010201 |  |  |
| M464T273 | 0.010205 |  |  |
| M590T277_1 | 0.010228 |  |  |
| M1251T284_1 | 0.010253 |  |  |
| M348T498 | 0.010283 |  |  |
| M489T402 | 0.010303 |  |  |
| M847T303 | 0.010331 |  |  |
| M1113T368_1 | 0.01036 |  |  |
| M871T376_1 | 0.010397 |  |  |
| M634T324 | 0.010408 |  |  |
| M764T278 | 0.010482 |  |  |
| M683T278_1 | 0.010546 |  |  |
| M1397T288_2 | 0.010658 |  |  |
| M862T280_4 | 0.010679 |  |  |
| M443T52 | 0.010679 |  |  |
| M547T52 | 0.010679 |  |  |
| M446T336 | 0.010827 |  |  |
| M622T283 | 0.010827 |  |  |
| M708T280 | 0.010856 |  |  |
| M187T62 | 0.010897 |  |  |
| M462T351 | 0.010897 |  |  |
| M475T274 | 0.010897 |  |  |
| M1061T287_1 | 0.0109 |  |  |
| M457T273_2 | 0.010916 |  |  |
| M1437T335_3 | 0.010965 |  |  |
| M1113T368_2 | 0.010977 |  |  |
| M474T275_1 | 0.010993 |  |  |
| M379T331 | 0.011035 |  |  |
| M660T375_2 | 0.011035 |  |  |
| M948T282 | 0.01104 |  |  |
| M896T353 | 0.01104 |  |  |
| M874T397 | 0.011057 |  |  |
| M434T274 | 0.011062 |  |  |
| M923T383_2 | 0.011117 |  |  |
| M374T363 | 0.011164 |  |  |
| M524T375 | 0.0112 |  |  |
| M1267T404 | 0.011203 |  |  |
| M600T414_2 | 0.011214 |  |  |
| M550T276 | 0.011221 |  |  |
| M774T281 | 0.011241 |  |  |
| M1118T379_1 | 0.011267 |  |  |
| M558T279_2 | 0.011329 |  |  |
| M646T280_1 | 0.011388 |  |  |
| M1154T333 | 0.011491 |  |  |
| M461T275 | 0.011519 |  |  |
| M389T276_2 | 0.011532 |  |  |
| M626T283 | 0.011606 |  |  |
| M318T332 | 0.011733 |  |  |
| M770T282 | 0.011735 |  |  |
| M947T337_2 | 0.011745 |  |  |
| M1216T387_2 | 0.011745 |  |  |
| M1194T288_2 | 0.011766 |  |  |
| M525T382 | 0.011796 |  |  |
| M500T275_1 | 0.011858 |  |  |
| M538T410 | 0.011876 |  |  |
| M342T273 | 0.011886 |  |  |
| M883T298 | 0.011929 |  |  |
| M757T281_1 | 0.011966 |  |  |
| M1165T290 | 0.011987 |  |  |
| M942T401_1 | 0.012034 |  |  |
| M1137T413 | 0.012034 |  |  |
| M911T284 | 0.012084 |  |  |
| M688T275 | 0.012084 |  |  |
| M945T343 | 0.012111 |  |  |
| M690T345 | 0.012179 |  |  |
| M1157T305 | 0.012179 |  |  |
| M542T376 | 0.012199 |  |  |
| M672T280 | 0.012237 |  |  |
| M831T392 | 0.012278 |  |  |
| M245T66 | 0.012364 |  |  |
| M410T321 | 0.012382 |  |  |
| M1067T389_2 | 0.012386 |  |  |
| M1134T363 | 0.012391 |  |  |
| M645T277_2 | 0.012407 |  |  |
| M613T276_2 | 0.01244 |  |  |
| M772T301 | 0.012491 |  |  |
| M836T279 | 0.012492 |  |  |
| M645T278 | 0.012492 |  |  |
| M870T283_2 | 0.012523 |  |  |
| M777T291 | 0.012523 |  |  |
| M951T345 | 0.012622 |  |  |
| M739T355 | 0.01272 |  |  |
| M723T351_1 | 0.012795 |  |  |
| M612T275 | 0.012838 |  |  |
| M802T291_1 | 0.012838 |  |  |
| M311T526 | 0.012844 |  |  |
| M1166T291_1 | 0.012883 |  |  |
| M500T535 | 0.012894 |  |  |
| M537T276 | 0.012904 |  |  |
| M492T273_3 | 0.012964 |  |  |
| M653T584 | 0.013013 |  |  |
| M1165T285 | 0.013076 |  |  |
| M832T282 | 0.013076 |  |  |
| M844T404 | 0.013078 |  |  |
| M1306T375 | 0.013158 |  |  |
| M1366T287_1 | 0.013223 |  |  |
| M1154T384_1 | 0.013245 |  |  |
| M526T67 | 0.013251 |  |  |
| M810T290 | 0.013251 |  |  |
| M81T61 | 0.013293 |  |  |
| M319T337 | 0.013329 |  |  |
| M460T275 | 0.013339 |  |  |
| M644T417_2 | 0.013353 |  |  |
| M937T280 | 0.013359 |  |  |
| M1353T324_1 | 0.013366 |  |  |
| M813T281 | 0.013392 |  |  |
| M1074T388 | 0.013478 |  |  |
| M300T313 | 0.013487 |  |  |
| M763T373 | 0.013498 |  |  |
| M537T351 | 0.013624 |  |  |
| M1491T300 | 0.013626 |  |  |
| M418T277 | 0.013636 |  |  |
| M325T663 | 0.013649 |  |  |
| M1436T335_1 | 0.013649 |  |  |
| M1153T384_2 | 0.013665 |  |  |
| M746T306 | 0.013665 |  |  |
| M438T578 | 0.013713 |  |  |
| M442T509 | 0.013718 |  |  |
| M511T405 | 0.013718 |  |  |
| M377T273 | 0.013727 |  |  |
| M581T324 | 0.013847 |  |  |
| M788T284 | 0.013884 |  |  |
| M1223T373 | 0.013888 |  |  |
| M692T359 | 0.013993 |  |  |
| M494T275 | 0.014037 |  |  |
| M895T283 | 0.014037 |  |  |
| M709T278_2 | 0.014037 |  |  |
| M578T278_2 | 0.014044 |  |  |
| M506T274_2 | 0.014113 |  |  |
| M808T304 | 0.014203 |  |  |
| M794T275 | 0.014215 |  |  |
| M907T282 | 0.01425 |  |  |
| M949T282_1 | 0.014257 |  |  |
| M938T284 | 0.014257 |  |  |
| M488T424 | 0.014335 |  |  |
| M534T388_1 | 0.014454 |  |  |
| M502T276 | 0.014579 |  |  |
| M1089T335_2 | 0.014632 |  |  |
| M1309T372_1 | 0.014632 |  |  |
| M948T279 | 0.014632 |  |  |
| M1020T280 | 0.014648 |  |  |
| M1138T280 | 0.014648 |  |  |
| M593T336 | 0.01469 |  |  |
| M942T296 | 0.014702 |  |  |
| M487T334 | 0.01475 |  |  |
| M689T345_2 | 0.014874 |  |  |
| M947T337_1 | 0.014926 |  |  |
| M941T312 | 0.015038 |  |  |
| M954T288 | 0.015109 |  |  |
| M602T276 | 0.015117 |  |  |
| M693T105 | 0.01514 |  |  |
| M980T397 | 0.015163 |  |  |
| M1394T291 | 0.015174 |  |  |
| M556T322 | 0.015175 |  |  |
| M512T661 | 0.015195 |  |  |
| M284T314 | 0.0152 |  |  |
| M547T410_2 | 0.01526 |  |  |
| M722T349_2 | 0.01526 |  |  |
| M261T276 | 0.015334 |  |  |
| M482T72 | 0.01542 |  |  |
| M1026T404 | 0.015526 |  |  |
| M310T277 | 0.015536 |  |  |
| M520T345 | 0.015597 |  |  |
| M903T281_1 | 0.01566 |  |  |
| M767T51 | 0.015667 |  |  |
| M955T388 | 0.0157 |  |  |
| M875T397 | 0.015701 |  |  |
| M514T274 | 0.015805 |  |  |
| M512T274_2 | 0.015871 |  |  |
| M977T282 | 0.015927 |  |  |
| M941T283 | 0.015934 |  |  |
| M697T286 | 0.015949 |  |  |
| M1153T384_3 | 0.016071 |  |  |
| M845T386 | 0.016242 |  |  |
| M839T288 | 0.016396 |  |  |
| M780T297 | 0.016435 |  |  |
| M467T276_2 | 0.016478 |  |  |
| M930T283_1 | 0.016478 |  |  |
| M515T352 | 0.016498 |  |  |
| M893T277 | 0.016498 |  |  |
| M898T385_3 | 0.016499 |  |  |
| M786T389 | 0.016512 |  |  |
| M766T276 | 0.016538 |  |  |
| M1216T387_1 | 0.01654 |  |  |
| M776T278 | 0.016542 |  |  |
| M1013T404_1 | 0.016657 |  |  |
| M601T311 | 0.016675 |  |  |
| M539T410 | 0.01668 |  |  |
| M752T284 | 0.016714 |  |  |
| M487T67 | 0.016731 |  |  |
| M383T65 | 0.01676 |  |  |
| M620T282 | 0.016764 |  |  |
| M897T290 | 0.016764 |  |  |
| M581T357 | 0.016771 |  |  |
| M1029T317 | 0.016794 |  |  |
| M1163T339_2 | 0.016821 |  |  |
| M942T400_1 | 0.016922 |  |  |
| M1261T282_2 | 0.016925 |  |  |
| M742T368_1 | 0.016925 |  |  |
| M107T395 | 0.017011 |  |  |
| M533T389 | 0.017102 |  |  |
| M1021T283 | 0.017307 |  |  |
| M712T280 | 0.017347 |  |  |
| M1093T410 | 0.017358 |  |  |
| M710T387 | 0.017369 |  |  |
| M509T294 | 0.017515 |  |  |
| M742T368_2 | 0.017532 |  |  |
| M460T86 | 0.017692 |  |  |
| M765T278 | 0.017733 |  |  |
| M346T276 | 0.01781 |  |  |
| M505T276 | 0.017832 |  |  |
| M545T281_1 | 0.017858 |  |  |
| M1044T374 | 0.017916 |  |  |
| M367T293 | 0.017938 |  |  |
| M533T408 | 0.017967 |  |  |
| M1261T330 | 0.01803 |  |  |
| M382T314 | 0.018053 |  |  |
| M778T280_2 | 0.0181 |  |  |
| M1088T335 | 0.018149 |  |  |
| M789T285 | 0.018149 |  |  |
| M748T279 | 0.018157 |  |  |
| M360T86 | 0.018157 |  |  |
| M897T385_1 | 0.018302 |  |  |
| M1229T310 | 0.018364 |  |  |
| M1260T329 | 0.018386 |  |  |
| M719T385 | 0.018467 |  |  |
| M826T277 | 0.018489 |  |  |
| M754T356 | 0.018489 |  |  |
| M446T278 | 0.018521 |  |  |
| M368T276 | 0.018522 |  |  |
| M279T60 | 0.018522 |  |  |
| M101T67 | 0.018522 |  |  |
| M952T282 | 0.018522 |  |  |
| M476T351 | 0.018553 |  |  |
| M728T277_1 | 0.018571 |  |  |
| M829T306_2 | 0.018612 |  |  |
| M121T287 | 0.018618 |  |  |
| M555T410 | 0.018806 |  |  |
| M556T280 | 0.018827 |  |  |
| M1154T384_3 | 0.018834 |  |  |
| M585T274 | 0.019 |  |  |
| M1227T375_1 | 0.019001 |  |  |
| M913T278 | 0.019032 |  |  |
| M226T498 | 0.019034 |  |  |
| M325T66 | 0.019165 |  |  |
| M732T275 | 0.01927 |  |  |
| M536T354 | 0.019317 |  |  |
| M489T277_1 | 0.019347 |  |  |
| M636T279 | 0.01936 |  |  |
| M933T392 | 0.019361 |  |  |
| M468T400_2 | 0.019484 |  |  |
| M527T351 | 0.019495 |  |  |
| M644T363 | 0.019627 |  |  |
| M815T283 | 0.019627 |  |  |
| M889T328 | 0.019649 |  |  |
| M565T275_1 | 0.019718 |  |  |
| M934T279 | 0.019755 |  |  |
| M861T413_3 | 0.019818 |  |  |
| M597T278 | 0.019928 |  |  |
| M861T378 | 0.019928 |  |  |
| M794T401_1 | 0.019928 |  |  |
| M934T285 | 0.019928 |  |  |
| M243T298 | 0.019991 |  |  |
| M1004T276 | 0.020188 |  |  |
| M869T279 | 0.020188 |  |  |
| M1154T384_2 | 0.020208 |  |  |
| M295T287 | 0.020231 |  |  |
| M755T277 | 0.020241 |  |  |
| M500T305 | 0.020379 |  |  |
| M147T47 | 0.020391 |  |  |
| M557T62 | 0.020482 |  |  |
| M641T67 | 0.020584 |  |  |
| M1261T282_1 | 0.020636 |  |  |
| M534T388_2 | 0.020636 |  |  |
| M536T350 | 0.02066 |  |  |
| M795T273 | 0.020681 |  |  |
| M871T376_2 | 0.020758 |  |  |
| M672T317 | 0.020871 |  |  |
| M295T499 | 0.020918 |  |  |
| M882T390_2 | 0.020983 |  |  |
| M862T413_2 | 0.020991 |  |  |
| M631T374 | 0.021074 |  |  |
| M982T288 | 0.02108 |  |  |
| M712T277 | 0.021116 |  |  |
| M518T358 | 0.021116 |  |  |
| M923T283 | 0.021125 |  |  |
| M646T279 | 0.02118 |  |  |
| M248T274 | 0.021248 |  |  |
| M528T273 | 0.021374 |  |  |
| M827T277 | 0.021482 |  |  |
| M1272T388 | 0.021482 |  |  |
| M809T290 | 0.021583 |  |  |
| M873T397 | 0.021583 |  |  |
| M189T295 | 0.021606 |  |  |
| M384T477 | 0.021623 |  |  |
| M268T574 | 0.021746 |  |  |
| M1273T387_2 | 0.021823 |  |  |
| M1011T376_3 | 0.021928 |  |  |
| M679T658 | 0.021985 |  |  |
| M372T383_1 | 0.022012 |  |  |
| M707T337 | 0.02205 |  |  |
| M681T281_2 | 0.022059 |  |  |
| M897T291 | 0.022082 |  |  |
| M609T370 | 0.022082 |  |  |
| M982T287 | 0.022232 |  |  |
| M390T275 | 0.022246 |  |  |
| M630T276 | 0.022303 |  |  |
| M1163T339_1 | 0.022307 |  |  |
| M688T278 | 0.022307 |  |  |
| M1038T359_1 | 0.022521 |  |  |
| M489T67 | 0.022521 |  |  |
| M842T293 | 0.022615 |  |  |
| M843T386 | 0.022692 |  |  |
| M188T58 | 0.022797 |  |  |
| M805T288 | 0.02284 |  |  |
| M518T349 | 0.023099 |  |  |
| M472T274 | 0.023109 |  |  |
| M453T420 | 0.023146 |  |  |
| M923T383_1 | 0.023196 |  |  |
| M657T378 | 0.023283 |  |  |
| M653T396_3 | 0.023284 |  |  |
| M1073T275 | 0.023317 |  |  |
| M1144T373 | 0.023329 |  |  |
| M818T389 | 0.023494 |  |  |
| M648T277 | 0.023593 |  |  |
| M402T276_2 | 0.023593 |  |  |
| M867T276_2 | 0.023688 |  |  |
| M578T412 | 0.023758 |  |  |
| M264T273_2 | 0.023762 |  |  |
| M557T350 | 0.023941 |  |  |
| M1197T385 | 0.023941 |  |  |
| M529T276 | 0.023979 |  |  |
| M198T498 | 0.023979 |  |  |
| M393T296 | 0.024 |  |  |
| M853T341 | 0.024 |  |  |
| M908T282_2 | 0.024001 |  |  |
| M480T280 | 0.024073 |  |  |
| M832T319 | 0.024295 |  |  |
| M792T659 | 0.024297 |  |  |
| M1316T397 | 0.02437 |  |  |
| M1089T280_2 | 0.024405 |  |  |
| M573T281 | 0.024499 |  |  |
| M460T277 | 0.024534 |  |  |
| M749T279_2 | 0.024694 |  |  |
| M742T368_3 | 0.024703 |  |  |
| M313T538 | 0.024881 |  |  |
| M651T412 | 0.024889 |  |  |
| M1013T404_2 | 0.024928 |  |  |
| M625T276_2 | 0.02494 |  |  |
| M1069T292 | 0.02494 |  |  |
| M852T282_2 | 0.024955 |  |  |
| M131T288 | 0.025013 |  |  |
| M922T383_2 | 0.025082 |  |  |
| M1451T335_1 | 0.025082 |  |  |
| M1037T401 | 0.025096 |  |  |
| M1492T303_2 | 0.025111 |  |  |
| M781T299 | 0.025182 |  |  |
| M1008T373_2 | 0.025336 |  |  |
| M120T288 | 0.02567 |  |  |
| M495T405 | 0.025736 |  |  |
| M723T351_2 | 0.025756 |  |  |
| M653T278 | 0.025834 |  |  |
| M922T280_1 | 0.026079 |  |  |
| M786T283 | 0.02608 |  |  |
| M641T342 | 0.026106 |  |  |
| M366T66 | 0.026178 |  |  |
| M785T390 | 0.026198 |  |  |
| M643T336 | 0.026237 |  |  |
| M500T310 | 0.026275 |  |  |
| M458T67 | 0.026275 |  |  |
| M606T281 | 0.026275 |  |  |
| M466T374 | 0.026308 |  |  |
| M132T294 | 0.026339 |  |  |
| M476T349 | 0.026354 |  |  |
| M209T477 | 0.026872 |  |  |
| M412T274 | 0.026872 |  |  |
| M1257T381_1 | 0.026888 |  |  |
| M685T66 | 0.026888 |  |  |
| M1155T385 | 0.02695 |  |  |
| M1029T372_2 | 0.027026 |  |  |
| M503T405_1 | 0.027208 |  |  |
| M216T279 | 0.027208 |  |  |
| M1167T393 | 0.027208 |  |  |
| M1424T311 | 0.027316 |  |  |
| M635T417_1 | 0.027332 |  |  |
| M788T277 | 0.027419 |  |  |
| M551T277 | 0.027526 |  |  |
| M557T324 | 0.027526 |  |  |
| M591T414_2 | 0.027526 |  |  |
| M910T278 | 0.027565 |  |  |
| M645T326 | 0.027565 |  |  |
| M725T392_3 | 0.027629 |  |  |
| M901T284 | 0.027634 |  |  |
| M249T55 | 0.027635 |  |  |
| M1208T287 | 0.027635 |  |  |
| M534T390 | 0.027689 |  |  |
| M657T419_1 | 0.027689 |  |  |
| M1427T396 | 0.02771 |  |  |
| M680T277_1 | 0.027713 |  |  |
| M281T272 | 0.027726 |  |  |
| M176T456 | 0.027752 |  |  |
| M455T276 | 0.027755 |  |  |
| M504T285 | 0.027839 |  |  |
| M754T355 | 0.027997 |  |  |
| M1071T279 | 0.028019 |  |  |
| M785T279_2 | 0.028019 |  |  |
| M368T294 | 0.028019 |  |  |
| M679T384 | 0.028019 |  |  |
| M921T279 | 0.028021 |  |  |
| M220T293 | 0.028092 |  |  |
| M1089T336 | 0.028252 |  |  |
| M780T323 | 0.028282 |  |  |
| M446T351 | 0.028291 |  |  |
| M947T281 | 0.028524 |  |  |
| M455T339 | 0.028531 |  |  |
| M424T330 | 0.028544 |  |  |
| M534T366 | 0.028618 |  |  |
| M539T280 | 0.02867 |  |  |
| M560T412 | 0.028819 |  |  |
| M653T396_2 | 0.028887 |  |  |
| M810T579 | 0.028911 |  |  |
| M1353T324_2 | 0.02898 |  |  |
| M819T322 | 0.029041 |  |  |
| M472T402 | 0.029104 |  |  |
| M283T314 | 0.0292 |  |  |
| M366T380 | 0.029303 |  |  |
| M908T282_1 | 0.029457 |  |  |
| M866T316 | 0.029567 |  |  |
| M688T323 | 0.029572 |  |  |
| M927T281 | 0.029663 |  |  |
| M613T416_2 | 0.029862 |  |  |
| M1260T331 | 0.030185 |  |  |
| M926T302 | 0.030328 |  |  |
| M578T373 | 0.030345 |  |  |
| M798T274 | 0.030357 |  |  |
| M1162T340 | 0.03036 |  |  |
| M823T386 | 0.03036 |  |  |
| M328T273 | 0.030387 |  |  |
| M457T368 | 0.030428 |  |  |
| M642T288 | 0.030471 |  |  |
| M546T276_2 | 0.030527 |  |  |
| M112T309 | 0.030574 |  |  |
| M386T273 | 0.030672 |  |  |
| M622T378 | 0.030755 |  |  |
| M775T338 | 0.030778 |  |  |
| M726T283 | 0.031076 |  |  |
| M949T282_2 | 0.031144 |  |  |
| M921T278 | 0.031144 |  |  |
| M160T46 | 0.031189 |  |  |
| M591T277 | 0.031213 |  |  |
| M297T319 | 0.031237 |  |  |
| M901T281 | 0.031237 |  |  |
| M343T283 | 0.031333 |  |  |
| M453T275 | 0.031408 |  |  |
| M793T400_2 | 0.031456 |  |  |
| M614T659 | 0.03153 |  |  |
| M490T359 | 0.031655 |  |  |
| M1362T282 | 0.03166 |  |  |
| M1353T324_4 | 0.03166 |  |  |
| M979T397 | 0.031997 |  |  |
| M791T280 | 0.032013 |  |  |
| M654T396_1 | 0.032034 |  |  |
| M687T324 | 0.032052 |  |  |
| M495T381 | 0.032054 |  |  |
| M696T278 | 0.032107 |  |  |
| M553T274 | 0.032113 |  |  |
| M920T367 | 0.032204 |  |  |
| M626T372_1 | 0.032292 |  |  |
| M482T659 | 0.03232 |  |  |
| M928T281_2 | 0.032834 |  |  |
| M535T390 | 0.032841 |  |  |
| M789T282 | 0.032876 |  |  |
| M769T384_2 | 0.032915 |  |  |
| M824T388_2 | 0.033 |  |  |
| M219T290 | 0.03309 |  |  |
| M591T278 | 0.033125 |  |  |
| M979T396 | 0.033125 |  |  |
| M103T288 | 0.033366 |  |  |
| M490T402 | 0.033395 |  |  |
| M516T579 | 0.033421 |  |  |
| M622T67 | 0.033423 |  |  |
| M867T276_1 | 0.033601 |  |  |
| M519T283 | 0.033716 |  |  |
| M911T281 | 0.033743 |  |  |
| M929T283 | 0.033754 |  |  |
| M1291T413_2 | 0.033836 |  |  |
| M425T323 | 0.03386 |  |  |
| M907T340 | 0.03386 |  |  |
| M1016T297_2 | 0.03386 |  |  |
| M360T273_2 | 0.033882 |  |  |
| M1003T276 | 0.033949 |  |  |
| M531T658 | 0.033997 |  |  |
| M1084T380_2 | 0.034014 |  |  |
| M618T282 | 0.034157 |  |  |
| M385T273 | 0.034157 |  |  |
| M543T67_2 | 0.03418 |  |  |
| M828T277 | 0.03418 |  |  |
| M726T358 | 0.034233 |  |  |
| M761T396 | 0.034283 |  |  |
| M928T281_1 | 0.034308 |  |  |
| M259T52 | 0.034508 |  |  |
| M287T67 | 0.034511 |  |  |
| M724T276 | 0.034547 |  |  |
| M1260T283 | 0.03455 |  |  |
| M677T276 | 0.034807 |  |  |
| M520T275_1 | 0.03504 |  |  |
| M295T330 | 0.03504 |  |  |
| M670T345 | 0.03505 |  |  |
| M577T412 | 0.035274 |  |  |
| M912T279 | 0.035334 |  |  |
| M1362T334 | 0.03539 |  |  |
| M793T400_1 | 0.035435 |  |  |
| M782T329 | 0.035435 |  |  |
| M754T293 | 0.035463 |  |  |
| M185T47 | 0.035669 |  |  |
| M1000T365 | 0.035845 |  |  |
| M719T384 | 0.035846 |  |  |
| M970T282 | 0.036004 |  |  |
| M1048T371 | 0.036004 |  |  |
| M409T52 | 0.036045 |  |  |
| M983T289_1 | 0.036045 |  |  |
| M694T278 | 0.036116 |  |  |
| M262T423 | 0.036124 |  |  |
| M569T276 | 0.036153 |  |  |
| M888T328 | 0.036184 |  |  |
| M232T302 | 0.036342 |  |  |
| M751T284_2 | 0.036944 |  |  |
| M203T276 | 0.036968 |  |  |
| M987T376_2 | 0.037223 |  |  |
| M835T658 | 0.037224 |  |  |
| M114T654 | 0.037419 |  |  |
| M479T380 | 0.037459 |  |  |
| M524T377 | 0.037459 |  |  |
| M265T55 | 0.037661 |  |  |
| M556T410_1 | 0.037683 |  |  |
| M1167T372 | 0.037807 |  |  |
| M1350T305 | 0.03804 |  |  |
| M182T259 | 0.038055 |  |  |
| M486T344 | 0.038137 |  |  |
| M391T67 | 0.038313 |  |  |
| M718T386 | 0.038365 |  |  |
| M362T280 | 0.038409 |  |  |
| M763T294 | 0.038434 |  |  |
| M1071T353 | 0.038498 |  |  |
| M654T277_1 | 0.038665 |  |  |
| M390T276 | 0.038737 |  |  |
| M950T345 | 0.038776 |  |  |
| M683T278_2 | 0.038776 |  |  |
| M662T279 | 0.038839 |  |  |
| M800T278 | 0.038903 |  |  |
| M835T279 | 0.039183 |  |  |
| M687T284 | 0.039193 |  |  |
| M664T354 | 0.03925 |  |  |
| M497T274 | 0.03925 |  |  |
| M955T387 | 0.039251 |  |  |
| M1016T281 | 0.039448 |  |  |
| M787T581 | 0.039448 |  |  |
| M600T414_1 | 0.039485 |  |  |
| M547T276_2 | 0.039932 |  |  |
| M1271T405_1 | 0.03997 |  |  |
| M980T396 | 0.03998 |  |  |
| M1164T285_2 | 0.039993 |  |  |
| M301T67 | 0.040072 |  |  |
| M1250T372_2 | 0.040128 |  |  |
| M583T414 | 0.040181 |  |  |
| M580T357 | 0.040259 |  |  |
| M579T276_1 | 0.040308 |  |  |
| M678T386 | 0.040346 |  |  |
| M776T338_1 | 0.040365 |  |  |
| M1109T396 | 0.040429 |  |  |
| M784T67 | 0.040477 |  |  |
| M776T338_2 | 0.040477 |  |  |
| M785T67 | 0.040477 |  |  |
| M1251T372 | 0.04058 |  |  |
| M633T322 | 0.040616 |  |  |
| M696T277 | 0.040706 |  |  |
| M777T280_2 | 0.040813 |  |  |
| M480T395 | 0.041041 |  |  |
| M329T329 | 0.041041 |  |  |
| M383T327_1 | 0.041096 |  |  |
| M414T446 | 0.041096 |  |  |
| M377T343 | 0.041096 |  |  |
| M1067T281 | 0.041585 |  |  |
| M912T289_1 | 0.041728 |  |  |
| M275T324 | 0.041728 |  |  |
| M699T289 | 0.041735 |  |  |
| M802T289 | 0.041885 |  |  |
| M910T277 | 0.042016 |  |  |
| M1249T372 | 0.042028 |  |  |
| M453T389 | 0.042286 |  |  |
| M653T396_1 | 0.042527 |  |  |
| M204T64 | 0.04254 |  |  |
| M579T277 | 0.042546 |  |  |
| M679T386 | 0.042569 |  |  |
| M930T379_1 | 0.042682 |  |  |
| M385T343 | 0.042778 |  |  |
| M1265T404 | 0.042918 |  |  |
| M607T409 | 0.042928 |  |  |
| M749T279_1 | 0.042989 |  |  |
| M1170T298 | 0.043002 |  |  |
| M900T305_2 | 0.043002 |  |  |
| M1270T404_2 | 0.043028 |  |  |
| M843T280 | 0.043325 |  |  |
| M926T274 | 0.043739 |  |  |
| M760T361 | 0.043943 |  |  |
| M1111T395 | 0.043944 |  |  |
| M953T281_2 | 0.043984 |  |  |
| M1029T309_1 | 0.04455 |  |  |
| M599T280 | 0.044712 |  |  |
| M1157T384_2 | 0.044712 |  |  |
| M497T351 | 0.044791 |  |  |
| M623T277 | 0.044922 |  |  |
| M494T405 | 0.044957 |  |  |
| M1362T283 | 0.045082 |  |  |
| M1102T370 | 0.045253 |  |  |
| M97T58 | 0.045409 |  |  |
| M1020T397 | 0.045515 |  |  |
| M443T273_3 | 0.045647 |  |  |
| M822T371_1 | 0.045674 |  |  |
| M512T405_2 | 0.045869 |  |  |
| M503T405_2 | 0.046078 |  |  |
| M1163T299 | 0.046169 |  |  |
| M888T396_2 | 0.046169 |  |  |
| M426T273 | 0.046195 |  |  |
| M727T358 | 0.046245 |  |  |
| M561T412 | 0.046393 |  |  |
| M934T347_2 | 0.046406 |  |  |
| M917T366 | 0.046565 |  |  |
| M919T401 | 0.046629 |  |  |
| M1368T412_2 | 0.046651 |  |  |
| M584T592 | 0.046685 |  |  |
| M1361T283 | 0.046739 |  |  |
| M613T373 | 0.046756 |  |  |
| M1270T405 | 0.047157 |  |  |
| M529T327 | 0.047557 |  |  |
| M683T51 | 0.047689 |  |  |
| M482T339 | 0.048285 |  |  |
| M689T345_1 | 0.048301 |  |  |
| M1171T298 | 0.048301 |  |  |
| M557T327 | 0.048403 |  |  |
| M1363T335_1 | 0.048427 |  |  |
| M334T306 | 0.048523 |  |  |
| M936T276 | 0.04865 |  |  |
| M733T638 | 0.048854 |  |  |
| M810T280 | 0.048904 |  |  |
| M737T275 | 0.04893 |  |  |
| M1029T310 | 0.049032 |  |  |
| M1317T329 | 0.049032 |  |  |
| M1106T293 | 0.049075 |  |  |
| M146T67 | 0.049082 |  |  |
| M459T274 | 0.049165 |  |  |
| M127T46 | 0.049205 |  |  |
| M746T275 | 0.049404 |  |  |
| M517T408 | 0.049443 |  |  |
| M773T281 | 0.049608 |  |  |
| M133T523 | 0.049792 |  |  |
| M443T273_1 | 0.049805 |  |  |
| M1117T377 | 0.049947 |  |  |

GC, gastric cancer

| **Table S5: the VIP of saliva metabolites between GC and postoperative group** | | | |
| --- | --- | --- | --- |
| Positive and Negative mode |  |  |  |
| Karyoplasmic ratio | VIP scores |  |  |
| M415T579 | 26.367 |  |  |
| M127T82 | 19.721 |  |  |
| M416T579 | 9.9121 |  |  |
| M79T61_2 | 8.5692 |  |  |
| M377T67 | 8.3609 |  |  |
| M58T113 | 7.747 |  |  |
| M1242T430 | 7.7097 |  |  |
| M274T503 | 7.5125 |  |  |
| M740T386 | 7.4095 |  |  |
| M318T505 | 6.8019 |  |  |
| M100T293 | 6.7107 |  |  |
| M213T273 | 6.4841 |  |  |
| M1243T435_1 | 5.4847 |  |  |
| M167T176 | 5.4661 |  |  |
| M230T122 | 5.357 |  |  |
| M742T383 | 4.2082 |  |  |
| M1242T436 | 3.9908 |  |  |
| M362T506 | 3.9277 |  |  |
| M310T277 | 3.6616 |  |  |
| M741T386 | 3.5439 |  |  |
| M379T66 | 3.092 |  |  |
| M367T276 | 3.0526 |  |  |
| M169T175 | 3.0097 |  |  |
| M1242T422 | 2.9614 |  |  |
| M967T497_1 | 2.8861 |  |  |
| M415T565 | 2.7424 |  |  |
| M127T62 | 2.7319 |  |  |
| M432T579 | 2.6272 |  |  |
| M761T590 | 2.5007 |  |  |
| M120T288 | 2.4185 |  |  |
| M300T275 | 2.4087 |  |  |
| M495T274 | 2.3558 |  |  |
| M1243T435_2 | 2.2896 |  |  |
| M469T307 | 1.9498 |  |  |
| M367T293 | 1.8975 |  |  |
| M1212T306_1 | 1.8787 |  |  |
| M1159T392_2 | 1.8387 |  |  |
| M846T579 | 1.8232 |  |  |
| M1160T392_1 | 1.7144 |  |  |
| M167T157 | 1.7039 |  |  |
| M1212T306_2 | 1.6943 |  |  |
| M966T497 | 1.6893 |  |  |
| M554T364 | 1.6735 |  |  |
| M743T383 | 1.6701 |  |  |
| M1243T422 | 1.6373 |  |  |
| M1202T372 | 1.6337 |  |  |
| M755T114 | 1.5738 |  |  |
| M355T157 | 1.564 |  |  |
| M407T305 | 1.5166 |  |  |
| M230T102 | 1.5108 |  |  |
| M89T112 | 1.4481 |  |  |
| M1159T391 | 1.447 |  |  |
| M275T503 | 1.445 |  |  |
| M791T403_1 | 1.4449 |  |  |
| M319T505 | 1.4075 |  |  |
| M798T421 | 1.3893 |  |  |
| M129T654 | 1.3553 |  |  |
| M369T273 | 1.3503 |  |  |
| M1269T302_1 | 1.3474 |  |  |
| M114T654 | 1.3471 |  |  |
| M406T506 | 1.3442 |  |  |
| M169T151 | 1.3285 |  |  |
| M434T276_2 | 1.3281 |  |  |
| M124T128 | 1.32 |  |  |
| M1212T305 | 1.3169 |  |  |
| M1088T303_1 | 1.3067 |  |  |
| M1269T302_2 | 1.3042 |  |  |
| M500T586 | 1.2655 |  |  |
| M409T275_1 | 1.2648 |  |  |
| M799T421_1 | 1.2512 |  |  |
| M180T246 | 1.2431 |  |  |
| M552T275 | 1.23 |  |  |
| M524T375 | 1.2183 |  |  |
| M191T169 | 1.2157 |  |  |
| M967T497_2 | 1.1977 |  |  |
| M701T67 | 1.1883 |  |  |
| M417T579 | 1.184 |  |  |
| M719T66 | 1.1773 |  |  |
| M791T403_2 | 1.1757 |  |  |
| M688T345 | 1.1712 |  |  |
| M456T587 | 1.1637 |  |  |
| M1242T500 | 1.1559 |  |  |
| M555T364 | 1.1551 |  |  |
| M1449T392_3 | 1.1212 |  |  |
| M99T62 | 1.1105 |  |  |
| M660T375_1 | 1.1096 |  |  |
| M711T389_2 | 1.1022 |  |  |
| M1203T373_1 | 1.0769 |  |  |
| M117T213 | 1.0698 |  |  |
| M378T67 | 1.0543 |  |  |
| M827T167 | 1.0462 |  |  |
| M665T124 | 1.0362 |  |  |
| M311T278 | 1.0228 |  |  |
| M504T285 | 1.0151 |  |  |
| M1119T286 | 1.01 |  |  |
| M1449T392_4 | 0.9936 |  |  |
| M147T654 | 0.97489 |  |  |
| M365T66 | 0.96848 |  |  |
| M412T588 | 0.93486 |  |  |
| M1202T374 | 0.93406 |  |  |
| M365T295 | 0.92507 |  |  |
| M173T108 | 0.92456 |  |  |
| M1454T306_2 | 0.9207 |  |  |
| M847T579 | 0.91803 |  |  |
| M968T468 | 0.91452 |  |  |
| M1449T392_2 | 0.90001 |  |  |
| M660T375_2 | 0.89753 |  |  |
| M620T312 | 0.89215 |  |  |
| M742T386 | 0.88134 |  |  |
| M613T276_1 | 0.8767 |  |  |
| M1088T302 | 0.87636 |  |  |
| M381T66 | 0.87507 |  |  |
| M476T305 | 0.86035 |  |  |
| M166T288 | 0.85659 |  |  |
| M1160T392_2 | 0.84957 |  |  |
| M486T311 | 0.84193 |  |  |
| M476T273 | 0.84005 |  |  |
| M471T301 | 0.83583 |  |  |
| M1269T303_2 | 0.83343 |  |  |
| M214T273 | 0.82593 |  |  |
| M1213T307_1 | 0.82332 |  |  |
| M1244T435 | 0.82117 |  |  |
| M1455T306 | 0.81563 |  |  |
| M827T192 | 0.80729 |  |  |
| M363T506 | 0.80482 |  |  |
| M1084T335_3 | 0.788 |  |  |
| M711T389_1 | 0.78243 |  |  |
| M772T404 | 0.75923 |  |  |
| M618T400 | 0.75894 |  |  |
| M875T280_2 | 0.75636 |  |  |
| M591T452 | 0.755 |  |  |
| M416T565 | 0.75484 |  |  |
| M626T453 | 0.74686 |  |  |
| M1250T317_4 | 0.74392 |  |  |
| M244T67 | 0.74296 |  |  |
| M792T420 | 0.738 |  |  |
| M846T303 | 0.73326 |  |  |
| M1450T392_1 | 0.73189 |  |  |
| M1119T285 | 0.73124 |  |  |
| M684T115 | 0.72902 |  |  |
| M63T61 | 0.72896 |  |  |
| M1269T303_1 | 0.723 |  |  |
| M1406T311_1 | 0.71781 |  |  |
| M711T388 | 0.71777 |  |  |
| M1454T307_2 | 0.71326 |  |  |
| M635T452 | 0.71226 |  |  |
| M763T67 | 0.71204 |  |  |
| M203T60 | 0.71117 |  |  |
| M582T453 | 0.70991 |  |  |
| M298T287 | 0.70679 |  |  |
| M1045T378 | 0.70499 |  |  |
| M839T287 | 0.70453 |  |  |
| M302T534 | 0.70327 |  |  |
| M433T579 | 0.69776 |  |  |
| M118T66 | 0.69623 |  |  |
| M873T159 | 0.69441 |  |  |
| M651T350 | 0.68289 |  |  |
| M862T334 | 0.67638 |  |  |
| M1172T310_1 | 0.6762 |  |  |
| M762T590 | 0.67201 |  |  |
| M544T585 | 0.67012 |  |  |
| M1119T283 | 0.6691 |  |  |
| M1250T317_3 | 0.66886 |  |  |
| M136T270 | 0.66653 |  |  |
| M453T579 | 0.66123 |  |  |
| M1085T335_1 | 0.66037 |  |  |
| M588T585 | 0.65786 |  |  |
| M773T282_2 | 0.65468 |  |  |
| M1106T368 | 0.65316 |  |  |
| M1243T308 | 0.64904 |  |  |
| M481T278 | 0.64521 |  |  |
| M464T319 | 0.64223 |  |  |
| M863T67 | 0.64196 |  |  |
| M1406T311_2 | 0.63532 |  |  |
| M1084T335_2 | 0.63513 |  |  |
| M601T452 | 0.6338 |  |  |
| M1172T310_2 | 0.63316 |  |  |
| M524T377 | 0.63096 |  |  |
| M484T318 | 0.62555 |  |  |
| M119T579 | 0.62398 |  |  |
| M502T276 | 0.62373 |  |  |
| M932T286 | 0.6211 |  |  |
| M839T286 | 0.62044 |  |  |
| M73T213 | 0.61667 |  |  |
| M994T292_1 | 0.61188 |  |  |
| M359T67 | 0.60994 |  |  |
| M632T583 | 0.60975 |  |  |
| M803T367_2 | 0.604 |  |  |
| M1242T499 | 0.60176 |  |  |
| M1069T280 | 0.60167 |  |  |
| M478T298 | 0.5938 |  |  |
| M173T70 | 0.5929 |  |  |
| M470T312 | 0.59109 |  |  |
| M908T281_2 | 0.58962 |  |  |
| M879T304 | 0.58885 |  |  |
| M288T120 | 0.58681 |  |  |
| M281T580 | 0.58474 |  |  |
| M301T261 | 0.58265 |  |  |
| M547T451_2 | 0.58233 |  |  |
| M1449T392_1 | 0.58062 |  |  |
| M799T421_2 | 0.57608 |  |  |
| M410T275_2 | 0.57517 |  |  |
| M211T246 | 0.57347 |  |  |
| M773T282_1 | 0.5718 |  |  |
| M682T452_3 | 0.56171 |  |  |
| M676T582 | 0.55853 |  |  |
| M600T274 | 0.55804 |  |  |
| M700T284_1 | 0.55406 |  |  |
| M1171T311 | 0.5534 |  |  |
| M459T583 | 0.55224 |  |  |
| M909T307_2 | 0.54891 |  |  |
| M648T453 | 0.54766 |  |  |
| M1243T306 | 0.54746 |  |  |
| M268T574 | 0.54609 |  |  |
| M1088T303_2 | 0.54547 |  |  |
| M641T394 | 0.54412 |  |  |
| M927T387 | 0.54405 |  |  |
| M462T290 | 0.54345 |  |  |
| M951T388_1 | 0.54312 |  |  |
| M368T276 | 0.54146 |  |  |
| M681T281_3 | 0.54073 |  |  |
| M787T581 | 0.54015 |  |  |
| M966T392_3 | 0.53924 |  |  |
| M870T283_1 | 0.5389 |  |  |
| M926T387 | 0.53772 |  |  |
| M793T400_1 | 0.53538 |  |  |
| M613T276_2 | 0.53339 |  |  |
| M1039T306_2 | 0.53331 |  |  |
| M493T285 | 0.53174 |  |  |
| M1203T373_2 | 0.52609 |  |  |
| M945T282 | 0.5246 |  |  |
| M421T276_1 | 0.52378 |  |  |
| M831T395_1 | 0.52232 |  |  |
| M784T390 | 0.52222 |  |  |
| M800T420 | 0.51852 |  |  |
| M491T273 | 0.51806 |  |  |
| M925T67 | 0.51669 |  |  |
| M792T403 | 0.51291 |  |  |
| M886T333 | 0.5115 |  |  |
| M539T67 | 0.50892 |  |  |
| M718T394 | 0.50841 |  |  |
| M994T291 | 0.50718 |  |  |
| M696T453_2 | 0.50336 |  |  |
| M594T279 | 0.49838 |  |  |
| M519T283 | 0.49619 |  |  |
| M177T62 | 0.49439 |  |  |
| M650T66 | 0.49424 |  |  |
| M584T592 | 0.49034 |  |  |
| M677T280 | 0.48858 |  |  |
| M1399T420_1 | 0.48614 |  |  |
| M721T66 | 0.48535 |  |  |
| M450T507 | 0.48366 |  |  |
| M1450T392_2 | 0.48264 |  |  |
| M763T115 | 0.48242 |  |  |
| M1093T285_2 | 0.48021 |  |  |
| M146T67 | 0.47873 |  |  |
| M283T314 | 0.47741 |  |  |
| M577T281 | 0.47649 |  |  |
| M1455T307_1 | 0.47375 |  |  |
| M1046T379 | 0.47303 |  |  |
| M409T276 | 0.47102 |  |  |
| M619T334_1 | 0.47058 |  |  |
| M1160T392_3 | 0.46973 |  |  |
| M703T67 | 0.46949 |  |  |
| M714T453 | 0.46861 |  |  |
| M1317T379 | 0.46852 |  |  |
| M1251T317_1 | 0.46761 |  |  |
| M182T259 | 0.46755 |  |  |
| M799T284_2 | 0.46603 |  |  |
| M1349T324_1 | 0.4643 |  |  |
| M645T277_1 | 0.46381 |  |  |
| M756T114 | 0.4637 |  |  |
| M492T273_1 | 0.46158 |  |  |
| M620T452_2 | 0.46093 |  |  |
| M790T395 | 0.46026 |  |  |
| M613T452 | 0.4581 |  |  |
| M803T367_1 | 0.45737 |  |  |
| M561T277 | 0.45708 |  |  |
| M552T277_2 | 0.45666 |  |  |
| M1213T306 | 0.45412 |  |  |
| M653T452_1 | 0.45314 |  |  |
| M652T350_1 | 0.45273 |  |  |
| M681T281_1 | 0.4503 |  |  |
| M272T67 | 0.45011 |  |  |
| M1047T375 | 0.44827 |  |  |
| M948T282 | 0.4446 |  |  |
| M572T452 | 0.44308 |  |  |
| M910T306 | 0.44259 |  |  |
| M1079T325_2 | 0.44175 |  |  |
| M809T307_1 | 0.44045 |  |  |
| M819T322 | 0.44043 |  |  |
| M590T277_1 | 0.43954 |  |  |
| M1372T300_1 | 0.43853 |  |  |
| M380T63 | 0.43828 |  |  |
| M1085T335_2 | 0.43766 |  |  |
| M1242T669_2 | 0.43736 |  |  |
| M161T71 | 0.43704 |  |  |
| M633T351 | 0.4367 |  |  |
| M504T331 | 0.43617 |  |  |
| M1405T311_2 | 0.43474 |  |  |
| M275T53 | 0.43403 |  |  |
| M421T276_2 | 0.43359 |  |  |
| M1048T287_2 | 0.43268 |  |  |
| M130T225 | 0.43128 |  |  |
| M604T451 | 0.43005 |  |  |
| M966T392_2 | 0.42902 |  |  |
| M360T86 | 0.42838 |  |  |
| M677T279 | 0.42633 |  |  |
| M813T287 | 0.42614 |  |  |
| M711T123 | 0.42507 |  |  |
| M825T281 | 0.42444 |  |  |
| M646T452 | 0.42436 |  |  |
| M1349T324_2 | 0.42368 |  |  |
| M660T453 | 0.42363 |  |  |
| M1163T391_1 | 0.42328 |  |  |
| M661T375_1 | 0.42286 |  |  |
| M967T393 | 0.42256 |  |  |
| M642T452 | 0.42217 |  |  |
| M707T66 | 0.42166 |  |  |
| M653T451 | 0.42162 |  |  |
| M839T285 | 0.4212 |  |  |
| M1107T368 | 0.41907 |  |  |
| M1039T307_2 | 0.41789 |  |  |
| M733T638 | 0.41756 |  |  |
| M1159T284 | 0.41542 |  |  |
| M195T62 | 0.41525 |  |  |
| M721T582 | 0.41454 |  |  |
| M217T61 | 0.41321 |  |  |
| M1093T286_2 | 0.41119 |  |  |
| M553T274 | 0.41089 |  |  |
| M950T388_2 | 0.41067 |  |  |
| M1238T388 | 0.41061 |  |  |
| M803T367_3 | 0.40975 |  |  |
| M704T286 | 0.40917 |  |  |
| M582T277 | 0.4066 |  |  |
| M1160T283_1 | 0.40643 |  |  |
| M609T451_1 | 0.406 |  |  |
| M645T277_2 | 0.406 |  |  |
| M1398T420 | 0.40582 |  |  |
| M594T450_2 | 0.40566 |  |  |
| M968T498 | 0.40535 |  |  |
| M1250T317_2 | 0.4048 |  |  |
| M681T281_2 | 0.40412 |  |  |
| M123T53 | 0.40352 |  |  |
| M668T453_1 | 0.40125 |  |  |
| M951T388_2 | 0.39849 |  |  |
| M101T293 | 0.39786 |  |  |
| M717T451 | 0.39766 |  |  |
| M407T506 | 0.39615 |  |  |
| M555T361 | 0.39435 |  |  |
| M968T669 | 0.39361 |  |  |
| M60T112 | 0.3936 |  |  |
| M653T452_2 | 0.39247 |  |  |
| M658T452_2 | 0.39102 |  |  |
| M638T451_3 | 0.38904 |  |  |
| M682T452_2 | 0.38815 |  |  |
| M675T452_1 | 0.38792 |  |  |
| M442T313 | 0.38752 |  |  |
| M651T452 | 0.38705 |  |  |
| M1398T419 | 0.38692 |  |  |
| M682T453 | 0.38635 |  |  |
| M813T281 | 0.38528 |  |  |
| M740T454_2 | 0.38266 |  |  |
| M793T400_2 | 0.38246 |  |  |
| M1163T392 | 0.38232 |  |  |
| M667T113 | 0.38226 |  |  |
| M744T277 | 0.38217 |  |  |
| M592T451 | 0.3804 |  |  |
| M829T392_2 | 0.37996 |  |  |
| M132T582 | 0.37978 |  |  |
| M753T293 | 0.37925 |  |  |
| M1204T367 | 0.37849 |  |  |
| M502T275 | 0.37847 |  |  |
| M682T452_1 | 0.37719 |  |  |
| M577T333 | 0.37561 |  |  |
| M641T396 | 0.37557 |  |  |
| M1243T307_2 | 0.37479 |  |  |
| M520T275_2 | 0.37463 |  |  |
| M231T120 | 0.37412 |  |  |
| M566T281 | 0.37404 |  |  |
| M301T274 | 0.37396 |  |  |
| M1270T303 | 0.37386 |  |  |
| M460T275 | 0.37273 |  |  |
| M744T383 | 0.37269 |  |  |
| M849T285 | 0.37209 |  |  |
| M461T273 | 0.37198 |  |  |
| M928T281_2 | 0.37187 |  |  |
| M725T392_1 | 0.37058 |  |  |
| M397T579 | 0.37032 |  |  |
| M1318T379 | 0.37019 |  |  |
| M912T412_2 | 0.37005 |  |  |
| M1061T287_3 | 0.3693 |  |  |
| M686T452 | 0.36903 |  |  |
| M479T279 | 0.36859 |  |  |
| M579T276_1 | 0.36855 |  |  |
| M744T275 | 0.36832 |  |  |
| M907T282 | 0.36701 |  |  |
| M660T452_3 | 0.3648 |  |  |
| M704T453_2 | 0.36336 |  |  |
| M1398T401 | 0.36282 |  |  |
| M477T273_1 | 0.36181 |  |  |
| M642T288 | 0.36116 |  |  |
| M963T279 | 0.36089 |  |  |
| M645T452 | 0.36068 |  |  |
| M1445T335_3 | 0.36052 |  |  |
| M1454T306_1 | 0.35931 |  |  |
| M624T451_1 | 0.35924 |  |  |
| M368T294 | 0.35905 |  |  |
| M1406T311_3 | 0.35883 |  |  |
| M1094T287_1 | 0.35815 |  |  |
| M168T176 | 0.35598 |  |  |
| M633T451 | 0.35559 |  |  |
| M1349T324_3 | 0.35425 |  |  |
| M700T284_2 | 0.35413 |  |  |
| M697T453_1 | 0.35373 |  |  |
| M627T452_2 | 0.35329 |  |  |
| M207T53 | 0.35224 |  |  |
| M1079T325_1 | 0.35186 |  |  |
| M1323T301_2 | 0.35139 |  |  |
| M939T318 | 0.35117 |  |  |
| M1120T284 | 0.35104 |  |  |
| M712T389_1 | 0.35092 |  |  |
| M676T278 | 0.35043 |  |  |
| M631T451_1 | 0.35027 |  |  |
| M932T288 | 0.34999 |  |  |
| M474T275_2 | 0.34887 |  |  |
| M692T453_2 | 0.34835 |  |  |
| M781T299 | 0.34821 |  |  |
| M933T286_1 | 0.34819 |  |  |
| M593T452_2 | 0.34753 |  |  |
| M638T451_4 | 0.34748 |  |  |
| M719T453 | 0.34726 |  |  |
| M670T452 | 0.34674 |  |  |
| M928T281_1 | 0.3465 |  |  |
| M1244T384_2 | 0.3459 |  |  |
| M674T452_2 | 0.34509 |  |  |
| M1323T301_1 | 0.34492 |  |  |
| M1266T404_3 | 0.34446 |  |  |
| M409T234 | 0.34406 |  |  |
| M638T451_2 | 0.34386 |  |  |
| M667T451 | 0.34374 |  |  |
| M672T374_1 | 0.3437 |  |  |
| M623T277 | 0.34348 |  |  |
| M239T301 | 0.34304 |  |  |
| M1070T279 | 0.34246 |  |  |
| M736T273 | 0.34244 |  |  |
| M711T453_2 | 0.34217 |  |  |
| M699T285 | 0.34134 |  |  |
| M677T451 | 0.34103 |  |  |
| M1116T286_1 | 0.34028 |  |  |
| M631T451_2 | 0.33958 |  |  |
| M675T452_2 | 0.33918 |  |  |
| M1244T421 | 0.3387 |  |  |
| M861T380_1 | 0.33826 |  |  |
| M730T281_2 | 0.33755 |  |  |
| M1453T392_4 | 0.33753 |  |  |
| M806T452 | 0.33694 |  |  |
| M1084T335_1 | 0.33686 |  |  |
| M389T347 | 0.33642 |  |  |
| M621T451_1 | 0.33542 |  |  |
| M667T452_2 | 0.3353 |  |  |
| M599T451 | 0.3349 |  |  |
| M701T115 | 0.33408 |  |  |
| M946T282_1 | 0.33355 |  |  |
| M440T312 | 0.33349 |  |  |
| M576T452_2 | 0.33338 |  |  |
| M725T392_2 | 0.3326 |  |  |
| M917T466 | 0.33183 |  |  |
| M702T67 | 0.33173 |  |  |
| M689T453_2 | 0.33155 |  |  |
| M1151T337 | 0.33092 |  |  |
| M801T420 | 0.33062 |  |  |
| M187T110 | 0.33046 |  |  |
| M995T171 | 0.33044 |  |  |
| M708T453_2 | 0.33033 |  |  |
| M720T66 | 0.32989 |  |  |
| M1445T335_2 | 0.32742 |  |  |
| M875T280_1 | 0.32721 |  |  |
| M1172T310_3 | 0.32694 |  |  |
| M689T345_1 | 0.32691 |  |  |
| M689T453_1 | 0.32688 |  |  |
| M611T452 | 0.32613 |  |  |
| M909T307_1 | 0.32605 |  |  |
| M682T283 | 0.32487 |  |  |
| M557T279 | 0.32474 |  |  |
| M649T451_2 | 0.32463 |  |  |
| M1453T392_3 | 0.32434 |  |  |
| M1159T283 | 0.32179 |  |  |
| M1048T287_1 | 0.32156 |  |  |
| M130T458 | 0.32112 |  |  |
| M392T331 | 0.32091 |  |  |
| M757T280 | 0.31971 |  |  |
| M913T412_1 | 0.31947 |  |  |
| M660T452_1 | 0.31927 |  |  |
| M461T275 | 0.31913 |  |  |
| M703T659 | 0.31896 |  |  |
| M645T451_2 | 0.3184 |  |  |
| M1186T311_3 | 0.31729 |  |  |
| M1371T297 | 0.31699 |  |  |
| M246T465 | 0.31647 |  |  |
| M595T453_3 | 0.31572 |  |  |
| M207T105 | 0.31529 |  |  |
| M441T297 | 0.31466 |  |  |
| M623T451_2 | 0.3143 |  |  |
| M850T283_2 | 0.31419 |  |  |
| M1048T375 | 0.3135 |  |  |
| M628T451_1 | 0.31318 |  |  |
| M861T376 | 0.31163 |  |  |
| M246T341 | 0.31146 |  |  |
| M927T388 | 0.31144 |  |  |
| M794T401_1 | 0.31143 |  |  |
| M325T66 | 0.31142 |  |  |
| M800T285_1 | 0.31096 |  |  |
| M614T276_2 | 0.3109 |  |  |
| M774T353 | 0.31081 |  |  |
| M679T453_1 | 0.31024 |  |  |
| M619T334_2 | 0.31014 |  |  |
| M606T681 | 0.31007 |  |  |
| M1314T335 | 0.30966 |  |  |
| M1242T669_1 | 0.30916 |  |  |
| M1025T67 | 0.30897 |  |  |
| M1093T286_1 | 0.30882 |  |  |
| M770T451 | 0.3086 |  |  |
| M1049T288_1 | 0.3083 |  |  |
| M1153T384_3 | 0.30805 |  |  |
| M233T60 | 0.30784 |  |  |
| M538T452 | 0.30767 |  |  |
| M650T452_2 | 0.30763 |  |  |
| M779T451 | 0.30753 |  |  |
| M825T278 | 0.30717 |  |  |
| M638T452 | 0.30604 |  |  |
| M728T115 | 0.30591 |  |  |
| M867T276_1 | 0.30511 |  |  |
| M1446T335_1 | 0.30489 |  |  |
| M331T61 | 0.30486 |  |  |
| M564T452_1 | 0.30363 |  |  |
| M1348T324_2 | 0.30361 |  |  |
| M631T453 | 0.30286 |  |  |
| M863T334 | 0.30252 |  |  |
| M1443T341_3 | 0.30232 |  |  |
| M606T453 | 0.30156 |  |  |
| M1454T392_1 | 0.29932 |  |  |
| M744T450_3 | 0.29921 |  |  |
| M1205T368_1 | 0.29846 |  |  |
| M616T452 | 0.29829 |  |  |
| M595T280 | 0.29826 |  |  |
| M226T498 | 0.2981 |  |  |
| M993T294 | 0.29809 |  |  |
| M1243T669_1 | 0.2978 |  |  |
| M969T669_1 | 0.29759 |  |  |
| M653T345 | 0.29695 |  |  |
| M848T579 | 0.29672 |  |  |
| M917T399 | 0.29641 |  |  |
| M1116T284 | 0.29624 |  |  |
| M596T277 | 0.2962 |  |  |
| M672T452_3 | 0.29613 |  |  |
| M722T279_2 | 0.29602 |  |  |
| M898T386 | 0.29526 |  |  |
| M616T450_3 | 0.2952 |  |  |
| M609T450 | 0.29499 |  |  |
| M671T281 | 0.2944 |  |  |
| M788T452_1 | 0.29435 |  |  |
| M925T165 | 0.294 |  |  |
| M747T659 | 0.2937 |  |  |
| M631T278 | 0.29295 |  |  |
| M881T298 | 0.29279 |  |  |
| M701T453_1 | 0.29195 |  |  |
| M670T323 | 0.29152 |  |  |
| M1039T306_1 | 0.2911 |  |  |
| M780T297 | 0.29104 |  |  |
| M1186T311_2 | 0.29094 |  |  |
| M728T306 | 0.2901 |  |  |
| M675T453 | 0.28992 |  |  |
| M1423T311_3 | 0.28968 |  |  |
| M918T466 | 0.28954 |  |  |
| M586T273 | 0.28935 |  |  |
| M865T67 | 0.28892 |  |  |
| M641T452 | 0.2888 |  |  |
| M730T283 | 0.28875 |  |  |
| M730T281_1 | 0.28865 |  |  |
| M346T535 | 0.28859 |  |  |
| M711T453_1 | 0.28859 |  |  |
| M666T124 | 0.28823 |  |  |
| M709T422 | 0.2877 |  |  |
| M643T452_1 | 0.28757 |  |  |
| M1199T307_2 | 0.28719 |  |  |
| M808T304 | 0.28713 |  |  |
| M905T346 | 0.28686 |  |  |
| M435T278 | 0.28684 |  |  |
| M683T453_2 | 0.28678 |  |  |
| M1061T286 | 0.28674 |  |  |
| M475T275_1 | 0.28672 |  |  |
| M587T453_2 | 0.28594 |  |  |
| M1035T278 | 0.28584 |  |  |
| M638T451_1 | 0.28557 |  |  |
| M577T292 | 0.28507 |  |  |
| M849T282 | 0.28449 |  |  |
| M828T192 | 0.28418 |  |  |
| M699T287 | 0.28414 |  |  |
| M489T402 | 0.28411 |  |  |
| M545T584 | 0.2838 |  |  |
| M762T451_1 | 0.28352 |  |  |
| M813T284 | 0.28329 |  |  |
| M912T388_2 | 0.28317 |  |  |
| M560T452_3 | 0.28275 |  |  |
| M681T453 | 0.28243 |  |  |
| M1061T287_2 | 0.28184 |  |  |
| M737T274 | 0.28166 |  |  |
| M493T280 | 0.28165 |  |  |
| M581T324 | 0.28147 |  |  |
| M838T286 | 0.28141 |  |  |
| M1007T373_2 | 0.28116 |  |  |
| M938T285 | 0.28097 |  |  |
| M1163T391_2 | 0.28049 |  |  |
| M528T274 | 0.27981 |  |  |
| M455T276 | 0.27979 |  |  |
| M624T452 | 0.27968 |  |  |
| M1116T286_2 | 0.27962 |  |  |
| M753T451_1 | 0.27928 |  |  |
| M1279T398 | 0.27922 |  |  |
| M1189T350_1 | 0.27911 |  |  |
| M659T659 | 0.2791 |  |  |
| M842T429_1 | 0.279 |  |  |
| M520T275_1 | 0.27831 |  |  |
| M637T452 | 0.27789 |  |  |
| M870T282 | 0.27777 |  |  |
| M659T452_3 | 0.27756 |  |  |
| M697T452_1 | 0.27745 |  |  |
| M652T350_2 | 0.2774 |  |  |
| M1267T338_1 | 0.27733 |  |  |
| M634T451_1 | 0.27732 |  |  |
| M928T383_2 | 0.27721 |  |  |
| M613T451_2 | 0.27711 |  |  |
| M462T309 | 0.27698 |  |  |
| M934T285 | 0.27673 |  |  |
| M429T62 | 0.27667 |  |  |
| M950T388_1 | 0.27636 |  |  |
| M525T375 | 0.27618 |  |  |
| M1140T392_2 | 0.27607 |  |  |
| M873T397 | 0.27507 |  |  |
| M495T278 | 0.27503 |  |  |
| M948T279 | 0.27488 |  |  |
| M632T280 | 0.27481 |  |  |
| M370T273 | 0.27359 |  |  |
| M173T441 | 0.27322 |  |  |
| M622T451_2 | 0.27301 |  |  |
| M614T452_2 | 0.27284 |  |  |
| M1423T311_4 | 0.27262 |  |  |
| M659T452_1 | 0.27216 |  |  |
| M381T71 | 0.27173 |  |  |
| M814T453 | 0.27117 |  |  |
| M612T450_1 | 0.2709 |  |  |
| M869T281 | 0.27016 |  |  |
| M646T451_1 | 0.26964 |  |  |
| M775T425 | 0.26894 |  |  |
| M938T499 | 0.26891 |  |  |
| M1154T384_1 | 0.2685 |  |  |
| M1491T306_2 | 0.26848 |  |  |
| M1140T392_1 | 0.2683 |  |  |
| M495T52 | 0.26806 |  |  |
| M608T450 | 0.26805 |  |  |
| M663T452 | 0.2675 |  |  |
| M757T281_1 | 0.26743 |  |  |
| M656T352 | 0.26737 |  |  |
| M330T559 | 0.26706 |  |  |
| M1358T364 | 0.267 |  |  |
| M831T382_1 | 0.26696 |  |  |
| M1199T306 | 0.26683 |  |  |
| M945T199 | 0.26678 |  |  |
| M630T450 | 0.26676 |  |  |
| M387T575 | 0.26669 |  |  |
| M912T388_1 | 0.26639 |  |  |
| M448T274 | 0.26637 |  |  |
| M608T453 | 0.26634 |  |  |
| M566T279 | 0.26608 |  |  |
| M861T380_2 | 0.26579 |  |  |
| M679T277_2 | 0.26558 |  |  |
| M1080T325_1 | 0.26482 |  |  |
| M665T452_1 | 0.2648 |  |  |
| M666T453 | 0.26465 |  |  |
| M773T404 | 0.26439 |  |  |
| M704T453_1 | 0.26437 |  |  |
| M670T278 | 0.26349 |  |  |
| M779T452_2 | 0.26331 |  |  |
| M1213T307_2 | 0.2626 |  |  |
| M589T453_2 | 0.26248 |  |  |
| M939T284 | 0.26238 |  |  |
| M1450T392_3 | 0.26208 |  |  |
| M1315T335 | 0.26199 |  |  |
| M598T282 | 0.26181 |  |  |
| M1005T311 | 0.2606 |  |  |
| M1398T402 | 0.26039 |  |  |
| M897T385_2 | 0.26013 |  |  |
| M604T453_2 | 0.26 |  |  |
| M1266T404_2 | 0.25991 |  |  |
| M497T351 | 0.25965 |  |  |
| M735T450_2 | 0.25944 |  |  |
| M765T580 | 0.2593 |  |  |
| M578T453_2 | 0.25925 |  |  |
| M1064T334 | 0.25864 |  |  |
| M797T427 | 0.25846 |  |  |
| M539T280 | 0.25844 |  |  |
| M1118T285 | 0.25819 |  |  |
| M682T278 | 0.25798 |  |  |
| M813T126 | 0.25756 |  |  |
| M457T586 | 0.25736 |  |  |
| M934T279 | 0.25694 |  |  |
| M207T126 | 0.25667 |  |  |
| M1085T335_3 | 0.25664 |  |  |
| M1200T299_3 | 0.25559 |  |  |
| M1162T392_2 | 0.25507 |  |  |
| M1303T350 | 0.255 |  |  |
| M551T278 | 0.25474 |  |  |
| M725T453 | 0.25464 |  |  |
| M621T416 | 0.25449 |  |  |
| M654T357 | 0.25441 |  |  |
| M929T383 | 0.25416 |  |  |
| M219T290 | 0.25416 |  |  |
| M1454T392_2 | 0.25393 |  |  |
| M1007T373_1 | 0.25347 |  |  |
| M511T405 | 0.25328 |  |  |
| M448T333 | 0.25327 |  |  |
| M575T337 | 0.25224 |  |  |
| M1267T388_1 | 0.2521 |  |  |
| M683T278_1 | 0.25201 |  |  |
| M633T584 | 0.25191 |  |  |
| M459T276 | 0.25189 |  |  |
| M492T342 | 0.25183 |  |  |
| M628T452 | 0.25171 |  |  |
| M573T315 | 0.25153 |  |  |
| M974T458 | 0.25122 |  |  |
| M1266T404_4 | 0.2509 |  |  |
| M725T284 | 0.25087 |  |  |
| M735T451 | 0.25085 |  |  |
| M566T452_1 | 0.25079 |  |  |
| M1200T299_2 | 0.2507 |  |  |
| M797T452_1 | 0.25059 |  |  |
| M308T284 | 0.25043 |  |  |
| M731T423 | 0.25039 |  |  |
| M764T382 | 0.25005 |  |  |
| M1245T384_1 | 0.25002 |  |  |
| M657T452_2 | 0.24968 |  |  |
| M671T374 | 0.24919 |  |  |
| M1042T316 | 0.24914 |  |  |
| M641T295 | 0.24892 |  |  |
| M70T275 | 0.24827 |  |  |
| M945T281 | 0.24814 |  |  |
| M850T454_1 | 0.24804 |  |  |
| M694T453_2 | 0.24785 |  |  |
| M635T451_1 | 0.24769 |  |  |
| M1107T219 | 0.24735 |  |  |
| M679T277_1 | 0.24713 |  |  |
| M687T420 | 0.24711 |  |  |
| M643T417 | 0.24679 |  |  |
| M133T90 | 0.24676 |  |  |
| M599T414 | 0.24649 |  |  |
| M616T450_1 | 0.24523 |  |  |
| M841T278 | 0.24522 |  |  |
| M433T274_1 | 0.24519 |  |  |
| M607T451 | 0.24502 |  |  |
| M744T450_2 | 0.24486 |  |  |
| M637T382 | 0.24378 |  |  |
| M1062T285_1 | 0.24372 |  |  |
| M635T451_2 | 0.24361 |  |  |
| M726T454 | 0.24361 |  |  |
| M1087T67 | 0.24341 |  |  |
| M753T424 | 0.24333 |  |  |
| M898T385_1 | 0.24324 |  |  |
| M631T279_2 | 0.24313 |  |  |
| M318T281 | 0.24303 |  |  |
| M1433T398 | 0.24256 |  |  |
| M1160T392_4 | 0.24249 |  |  |
| M501T584 | 0.24212 |  |  |
| M232T302 | 0.24189 |  |  |
| M665T419 | 0.24168 |  |  |
| M967T392_1 | 0.24126 |  |  |
| M1063T284_1 | 0.24118 |  |  |
| M1078T335_1 | 0.24107 |  |  |
| M621T453_2 | 0.24098 |  |  |
| M951T388_3 | 0.24093 |  |  |
| M622T453 | 0.24092 |  |  |
| M1444T341_1 | 0.24059 |  |  |
| M632T279 | 0.24009 |  |  |
| M963T280 | 0.24007 |  |  |
| M368T589 | 0.23995 |  |  |
| M1243T307_1 | 0.2393 |  |  |
| M128T180 | 0.23928 |  |  |
| M650T452_1 | 0.23897 |  |  |
| M288T212 | 0.23895 |  |  |
| M624T277_2 | 0.23865 |  |  |
| M291T53 | 0.23852 |  |  |
| M1443T341_2 | 0.23824 |  |  |
| M908T282_2 | 0.23765 |  |  |
| M879T311_1 | 0.23755 |  |  |
| M1040T306 | 0.23735 |  |  |
| M781T66 | 0.23708 |  |  |
| M832T453 | 0.23679 |  |  |
| M211T282 | 0.23662 |  |  |
| M460T86 | 0.2362 |  |  |
| M684T286_1 | 0.23615 |  |  |
| M559T295 | 0.23604 |  |  |
| M906T285 | 0.23547 |  |  |
| M820T428_1 | 0.2354 |  |  |
| M712T280 | 0.23531 |  |  |
| M922T282 | 0.2348 |  |  |
| M533T408 | 0.23469 |  |  |
| M598T451 | 0.23446 |  |  |
| M513T275 | 0.2343 |  |  |
| M580T450 | 0.23421 |  |  |
| M948T450 | 0.23384 |  |  |
| M797T446 | 0.23372 |  |  |
| M831T395_2 | 0.23351 |  |  |
| M804T367 | 0.23348 |  |  |
| M451T61 | 0.2333 |  |  |
| M1398T286_2 | 0.23263 |  |  |
| M644T451_1 | 0.23257 |  |  |
| M1349T324_4 | 0.23224 |  |  |
| M481T354 | 0.23221 |  |  |
| M639T451_2 | 0.23187 |  |  |
| M1049T288_2 | 0.23185 |  |  |
| M653T396_2 | 0.23174 |  |  |
| M1373T312_2 | 0.23136 |  |  |
| M479T52 | 0.23116 |  |  |
| M645T278 | 0.23094 |  |  |
| M521T275_1 | 0.23069 |  |  |
| M880T304 | 0.23007 |  |  |
| M748T279 | 0.22972 |  |  |
| M654T345_1 | 0.2296 |  |  |
| M763T294 | 0.22952 |  |  |
| M521T277 | 0.22914 |  |  |
| M733T454_2 | 0.22858 |  |  |
| M871T282 | 0.22748 |  |  |
| M814T282_1 | 0.22695 |  |  |
| M907T340 | 0.22651 |  |  |
| M616T450_2 | 0.22648 |  |  |
| M799T285 | 0.2259 |  |  |
| M1226T285 | 0.22589 |  |  |
| M1165T434 | 0.22569 |  |  |
| M1398T286_3 | 0.22563 |  |  |
| M864T67 | 0.22526 |  |  |
| M622T283 | 0.22509 |  |  |
| M1399T285 | 0.22494 |  |  |
| M228T120 | 0.22441 |  |  |
| M887T334 | 0.22415 |  |  |
| M1064T332 | 0.22382 |  |  |
| M477T305 | 0.22382 |  |  |
| M1225T286 | 0.2237 |  |  |
| M458T67 | 0.22367 |  |  |
| M718T386 | 0.22354 |  |  |
| M331T274_2 | 0.2235 |  |  |
| M199T60 | 0.22311 |  |  |
| M973T282 | 0.2223 |  |  |
| M798T427 | 0.22213 |  |  |
| M516T579 | 0.22195 |  |  |
| M615T346 | 0.22125 |  |  |
| M1434T398 | 0.22115 |  |  |
| M672T452_1 | 0.22113 |  |  |
| M613T451_3 | 0.2211 |  |  |
| M814T282_2 | 0.21979 |  |  |
| M191T53 | 0.21932 |  |  |
| M1004T311_2 | 0.2192 |  |  |
| M726T450 | 0.21916 |  |  |
| M1066T389_2 | 0.2191 |  |  |
| M614T452_1 | 0.21906 |  |  |
| M861T413_2 | 0.21901 |  |  |
| M1153T384_2 | 0.21901 |  |  |
| M732T423_1 | 0.21897 |  |  |
| M555T410 | 0.21897 |  |  |
| M981T286_1 | 0.2186 |  |  |
| M727T450 | 0.21844 |  |  |
| M815T453 | 0.21843 |  |  |
| M921T376_1 | 0.21836 |  |  |
| M912T412_1 | 0.2183 |  |  |
| M992T452_1 | 0.21823 |  |  |
| M617T451 | 0.21818 |  |  |
| M1078T335_2 | 0.21816 |  |  |
| M953T282_2 | 0.21798 |  |  |
| M798T412 | 0.21794 |  |  |
| M961T401 | 0.21739 |  |  |
| M614T659 | 0.2173 |  |  |
| M1042T317_3 | 0.21696 |  |  |
| M814T281 | 0.21658 |  |  |
| M849T284 | 0.21645 |  |  |
| M496T593 | 0.21633 |  |  |
| M578T333 | 0.21599 |  |  |
| M474T579 | 0.21599 |  |  |
| M1280T398 | 0.21592 |  |  |
| M421T276_3 | 0.21571 |  |  |
| M859T454 | 0.21536 |  |  |
| M1244T666_2 | 0.21511 |  |  |
| M492T273_2 | 0.21497 |  |  |
| M121T287 | 0.21465 |  |  |
| M547T275 | 0.21461 |  |  |
| M1152T337 | 0.21458 |  |  |
| M718T450 | 0.21458 |  |  |
| M672T317 | 0.21435 |  |  |
| M709T449_1 | 0.21398 |  |  |
| M1066T306_1 | 0.21392 |  |  |
| M793T450 | 0.21387 |  |  |
| M1003T452_1 | 0.21385 |  |  |
| M299T273 | 0.21353 |  |  |
| M1455T307_2 | 0.21345 |  |  |
| M1212T307 | 0.21334 |  |  |
| M454T579 | 0.21295 |  |  |
| M864T430_1 | 0.21289 |  |  |
| M1453T392_2 | 0.21204 |  |  |
| M1108T365 | 0.21176 |  |  |
| M734T374 | 0.21174 |  |  |
| M753T451_2 | 0.21166 |  |  |
| M615T277_2 | 0.21165 |  |  |
| M443T273_1 | 0.21136 |  |  |
| M987T396_3 | 0.21002 |  |  |
| M619T364 | 0.21001 |  |  |
| M366T294 | 0.20982 |  |  |
| M1078T336 | 0.20968 |  |  |
| M829T306_1 | 0.20964 |  |  |
| M1266T404_1 | 0.20957 |  |  |
| M487T311 | 0.20947 |  |  |
| M652T451 | 0.20931 |  |  |
| M969T669_2 | 0.20922 |  |  |
| M754T424_1 | 0.20889 |  |  |
| M203T294 | 0.20874 |  |  |
| M937T450_1 | 0.20874 |  |  |
| M830T667_1 | 0.20864 |  |  |
| M881T277 | 0.20861 |  |  |
| M1164T436 | 0.20836 |  |  |
| M335T177 | 0.2081 |  |  |
| M631T374 | 0.20806 |  |  |
| M867T455 | 0.20787 |  |  |
| M1112T289 | 0.20715 |  |  |
| M1204T370 | 0.20685 |  |  |
| M820T428_2 | 0.20668 |  |  |
| M1230T316_2 | 0.20623 |  |  |
| M101T67 | 0.20569 |  |  |
| M619T454 | 0.20552 |  |  |
| M316T289 | 0.20546 |  |  |
| M1111T395 | 0.20532 |  |  |
| M918T465 | 0.20523 |  |  |
| M670T165 | 0.20507 |  |  |
| M823T453_2 | 0.20506 |  |  |
| M733T454_1 | 0.20504 |  |  |
| M678T280 | 0.20463 |  |  |
| M1115T400_1 | 0.20448 |  |  |
| M900T336 | 0.20428 |  |  |
| M413T586 | 0.20413 |  |  |
| M1423T311_2 | 0.20409 |  |  |
| M1002T452_2 | 0.20402 |  |  |
| M183T176 | 0.2039 |  |  |
| M785T390 | 0.20369 |  |  |
| M959T450 | 0.2036 |  |  |
| M1266T339 | 0.20302 |  |  |
| M1063T285_1 | 0.2029 |  |  |
| M1016T282 | 0.20269 |  |  |
| M600T642 | 0.2026 |  |  |
| M890T165 | 0.20212 |  |  |
| M842T293 | 0.20191 |  |  |
| M243T298 | 0.20181 |  |  |
| M1373T311 | 0.20167 |  |  |
| M669T583 | 0.20165 |  |  |
| M511T52 | 0.20163 |  |  |
| M1359T364_1 | 0.20161 |  |  |
| M303T271 | 0.20148 |  |  |
| M427T52 | 0.20133 |  |  |
| M776T425 | 0.20129 |  |  |
| M846T333 | 0.20099 |  |  |
| M774T400 | 0.20064 |  |  |
| M203T46 | 0.19994 |  |  |
| M372T367 | 0.19944 |  |  |
| M865T350 | 0.19936 |  |  |
| M582T325 | 0.19922 |  |  |
| M970T451_1 | 0.19916 |  |  |
| M1267T338_2 | 0.19898 |  |  |
| M536T350 | 0.19893 |  |  |
| M124T177 | 0.19851 |  |  |
| M577T412 | 0.1985 |  |  |
| M962T280_2 | 0.19836 |  |  |
| M843T386 | 0.19814 |  |  |
| M245T373 | 0.19801 |  |  |
| M946T282_2 | 0.198 |  |  |
| M1446T335_2 | 0.19788 |  |  |
| M800T422 | 0.19783 |  |  |
| M1154T384_2 | 0.19769 |  |  |
| M915T449_1 | 0.19742 |  |  |
| M839T288 | 0.19718 |  |  |
| M688T421 | 0.19715 |  |  |
| M261T276 | 0.1971 |  |  |
| M614T276_1 | 0.19703 |  |  |
| M1138T281 | 0.19696 |  |  |
| M792T404 | 0.19691 |  |  |
| M1251T317_2 | 0.19671 |  |  |
| M1231T317_1 | 0.19669 |  |  |
| M731T282 | 0.19664 |  |  |
| M879T311_2 | 0.19644 |  |  |
| M831T382_2 | 0.19632 |  |  |
| M935T278 | 0.19602 |  |  |
| M1267T388_2 | 0.1959 |  |  |
| M764T67 | 0.19584 |  |  |
| M374T559 | 0.19564 |  |  |
| M672T373 | 0.19558 |  |  |
| M908T432_1 | 0.19526 |  |  |
| M130T201 | 0.19499 |  |  |
| M512T661 | 0.1948 |  |  |
| M886T431_1 | 0.19465 |  |  |
| M1165T290 | 0.19462 |  |  |
| M618T282 | 0.19452 |  |  |
| M1076T303 | 0.19425 |  |  |
| M979T397 | 0.19404 |  |  |
| M1448T392 | 0.19377 |  |  |
| M404T323 | 0.19371 |  |  |
| M461T274 | 0.1932 |  |  |
| M913T412_2 | 0.193 |  |  |
| M1177T400_1 | 0.19285 |  |  |
| M890T194 | 0.19268 |  |  |
| M477T273_2 | 0.19268 |  |  |
| M1407T312 | 0.19228 |  |  |
| M259T52 | 0.19212 |  |  |
| M411T52_1 | 0.19209 |  |  |
| M227T83 | 0.19183 |  |  |
| M135T579 | 0.19161 |  |  |
| M494T280 | 0.19126 |  |  |
| M840T386 | 0.19118 |  |  |
| M664T452 | 0.19113 |  |  |
| M694T453_1 | 0.19099 |  |  |
| M443T273_3 | 0.19099 |  |  |
| M467T276_1 | 0.19097 |  |  |
| M948T280 | 0.19095 |  |  |
| M897T578 | 0.1907 |  |  |
| M315T61 | 0.19064 |  |  |
| M981T451_1 | 0.19055 |  |  |
| M641T294 | 0.19032 |  |  |
| M679T278 | 0.19004 |  |  |
| M346T288 | 0.19002 |  |  |
| M1065T334_1 | 0.18885 |  |  |
| M806T453_1 | 0.18877 |  |  |
| M876T281_1 | 0.18867 |  |  |
| M947T450 | 0.1885 |  |  |
| M1120T286_1 | 0.1884 |  |  |
| M1008T373_1 | 0.18816 |  |  |
| M850T281 | 0.18803 |  |  |
| M752T301 | 0.18802 |  |  |
| M986T288 | 0.1878 |  |  |
| M451T507 | 0.18713 |  |  |
| M888T396_2 | 0.18709 |  |  |
| M687T324 | 0.187 |  |  |
| M494T508 | 0.18685 |  |  |
| M587T273_1 | 0.1868 |  |  |
| M980T286 | 0.18639 |  |  |
| M1177T400_2 | 0.18628 |  |  |
| M562T278_1 | 0.18606 |  |  |
| M771T451 | 0.18586 |  |  |
| M910T307 | 0.18582 |  |  |
| M654T452_1 | 0.18579 |  |  |
| M581T452_2 | 0.18574 |  |  |
| M761T451 | 0.18559 |  |  |
| M546T276_1 | 0.18539 |  |  |
| M677T582 | 0.18534 |  |  |
| M591T278 | 0.18466 |  |  |
| M1066T306_2 | 0.18452 |  |  |
| M1204T372 | 0.18433 |  |  |
| M791T389_1 | 0.18431 |  |  |
| M453T67 | 0.18427 |  |  |
| M1225T287_2 | 0.18427 |  |  |
| M558T279_1 | 0.18414 |  |  |
| M904T449_1 | 0.184 |  |  |
| M469T275 | 0.18369 |  |  |
| M846T334 | 0.18369 |  |  |
| M1454T392_3 | 0.18334 |  |  |
| M861T279 | 0.1833 |  |  |
| M841T454 | 0.18308 |  |  |
| M537T410 | 0.18303 |  |  |
| M672T281 | 0.18297 |  |  |
| M1424T310 | 0.1829 |  |  |
| M405T310 | 0.18287 |  |  |
| M1094T286 | 0.18286 |  |  |
| M1246T380 | 0.18252 |  |  |
| M303T534 | 0.18248 |  |  |
| M644T641 | 0.18239 |  |  |
| M548T274 | 0.18221 |  |  |
| M1048T288 | 0.1822 |  |  |
| M113T56 | 0.182 |  |  |
| M556T643 | 0.18189 |  |  |
| M519T276 | 0.18188 |  |  |
| M719T394 | 0.18127 |  |  |
| M1066T389_1 | 0.18094 |  |  |
| M467T60 | 0.1809 |  |  |
| M850T454_2 | 0.18087 |  |  |
| M730T389 | 0.18051 |  |  |
| M300T363 | 0.1801 |  |  |
| M1319T375 | 0.17959 |  |  |
| M879T286 | 0.17933 |  |  |
| M534T275_4 | 0.17915 |  |  |
| M656T298 | 0.17913 |  |  |
| M1090T286 | 0.17908 |  |  |
| M1090T285 | 0.17895 |  |  |
| M698T285_1 | 0.17888 |  |  |
| M351T589 | 0.17866 |  |  |
| M842T429_2 | 0.17855 |  |  |
| M1244T384_1 | 0.17826 |  |  |
| M1067T389_1 | 0.17818 |  |  |
| M1476T317 | 0.17807 |  |  |
| M888T328 | 0.17775 |  |  |
| M639T347 | 0.1776 |  |  |
| M512T405_1 | 0.17746 |  |  |
| M911T286 | 0.17725 |  |  |
| M589T585 | 0.17706 |  |  |
| M829T307 | 0.17691 |  |  |
| M861T413_3 | 0.1769 |  |  |
| M1090T287 | 0.17665 |  |  |
| M839T111 | 0.17658 |  |  |
| M796T419 | 0.17642 |  |  |
| M1165T287 | 0.17638 |  |  |
| M642T396_1 | 0.17629 |  |  |
| M954T499 | 0.17623 |  |  |
| M915T276 | 0.17619 |  |  |
| M900T305_2 | 0.17606 |  |  |
| M992T275 | 0.17545 |  |  |
| M1118T379_2 | 0.17514 |  |  |
| M618T325 | 0.17512 |  |  |
| M1262T329 | 0.17495 |  |  |
| M1016T297_2 | 0.17475 |  |  |
| M1035T453 | 0.1747 |  |  |
| M926T67 | 0.17455 |  |  |
| M653T396_1 | 0.17445 |  |  |
| M295T330 | 0.1743 |  |  |
| M682T280_1 | 0.17338 |  |  |
| M926T450_1 | 0.17327 |  |  |
| M462T324 | 0.17321 |  |  |
| M538T421 | 0.17313 |  |  |
| M1304T350 | 0.17304 |  |  |
| M936T450_2 | 0.17294 |  |  |
| M559T275 | 0.17276 |  |  |
| M1244T307 | 0.17259 |  |  |
| M788T452_2 | 0.17245 |  |  |
| M554T274_2 | 0.17244 |  |  |
| M1118T379_3 | 0.17225 |  |  |
| M925T450 | 0.17212 |  |  |
| M1399T420_2 | 0.17185 |  |  |
| M749T280 | 0.17182 |  |  |
| M875T437 | 0.1717 |  |  |
| M967T279 | 0.17159 |  |  |
| M894T455_1 | 0.17158 |  |  |
| M574T452 | 0.17149 |  |  |
| M1188T349 | 0.17128 |  |  |
| M1160T284 | 0.17125 |  |  |
| M1108T368 | 0.17111 |  |  |
| M1014T452 | 0.17085 |  |  |
| M968T412 | 0.1705 |  |  |
| M922T280_1 | 0.17044 |  |  |
| M513T273 | 0.17038 |  |  |
| M624T363 | 0.17025 |  |  |
| M589T338 | 0.17015 |  |  |
| M797T282 | 0.16956 |  |  |
| M867T276_2 | 0.16953 |  |  |
| M1230T316_1 | 0.16915 |  |  |
| M580T289 | 0.16881 |  |  |
| M1025T453_1 | 0.16859 |  |  |
| M991T452_2 | 0.16847 |  |  |
| M1492T303_1 | 0.16833 |  |  |
| M757T377 | 0.16822 |  |  |
| M825T436 | 0.16818 |  |  |
| M778T330 | 0.168 |  |  |
| M907T287 | 0.16792 |  |  |
| M729T278 | 0.16791 |  |  |
| M921T375 | 0.16766 |  |  |
| M748T659 | 0.16761 |  |  |
| M939T283 | 0.16761 |  |  |
| M712T123 | 0.16755 |  |  |
| M295T579 | 0.16751 |  |  |
| M940T318 | 0.16743 |  |  |
| M796T452 | 0.16739 |  |  |
| M930T285 | 0.16724 |  |  |
| M864T430_2 | 0.16668 |  |  |
| M1349T304 | 0.16668 |  |  |
| M1194T424 | 0.16661 |  |  |
| M1265T325_2 | 0.16651 |  |  |
| M1013T453_2 | 0.16651 |  |  |
| M936T281 | 0.16649 |  |  |
| M1425T391_2 | 0.16648 |  |  |
| M598T67 | 0.16632 |  |  |
| M1398T286_1 | 0.16621 |  |  |
| M553T275_1 | 0.16619 |  |  |
| M622T416 | 0.16599 |  |  |
| M861T413_1 | 0.16588 |  |  |
| M1140T391_2 | 0.16586 |  |  |
| M712T389_2 | 0.16578 |  |  |
| M1279T302 | 0.16571 |  |  |
| M1129T360_2 | 0.16561 |  |  |
| M1319T378 | 0.16534 |  |  |
| M612T453_1 | 0.16519 |  |  |
| M756T280_2 | 0.16516 |  |  |
| M482T274 | 0.1649 |  |  |
| M710T422_1 | 0.1643 |  |  |
| M612T275 | 0.16419 |  |  |
| M1267T389 | 0.16419 |  |  |
| M151T368 | 0.16403 |  |  |
| M1373T312_1 | 0.16356 |  |  |
| M353T60 | 0.16347 |  |  |
| M549T61 | 0.16305 |  |  |
| M981T285_1 | 0.16291 |  |  |
| M528T382 | 0.16289 |  |  |
| M503T274 | 0.1628 |  |  |
| M1265T325_1 | 0.16259 |  |  |
| M932T307 | 0.16251 |  |  |
| M979T396 | 0.16227 |  |  |
| M1013T404_1 | 0.1622 |  |  |
| M914T450 | 0.16183 |  |  |
| M433T274_2 | 0.16175 |  |  |
| M735T374_1 | 0.16141 |  |  |
| M1244T666_1 | 0.16126 |  |  |
| M1128T344_1 | 0.16109 |  |  |
| M176T456 | 0.16085 |  |  |
| M932T290_2 | 0.16082 |  |  |
| M1016T281 | 0.16069 |  |  |
| M1025T453_2 | 0.16048 |  |  |
| M459T274 | 0.16047 |  |  |
| M892T449 | 0.15998 |  |  |
| M320T505 | 0.15996 |  |  |
| M774T281 | 0.15992 |  |  |
| M1444T341_2 | 0.15991 |  |  |
| M1138T400_1 | 0.15986 |  |  |
| M616T363 | 0.15984 |  |  |
| M933T307_1 | 0.15981 |  |  |
| M1114T281 | 0.15905 |  |  |
| M1047T379 | 0.15899 |  |  |
| M1187T311_1 | 0.15865 |  |  |
| M933T286_2 | 0.1586 |  |  |
| M824T453_1 | 0.1586 |  |  |
| M554T330 | 0.15855 |  |  |
| M802T291_1 | 0.15854 |  |  |
| M1391T284_2 | 0.15849 |  |  |
| M442T298 | 0.15848 |  |  |
| M930T433_1 | 0.15838 |  |  |
| M547T276_1 | 0.15835 |  |  |
| M1226T287_1 | 0.15834 |  |  |
| M395T588 | 0.15831 |  |  |
| M494T285 | 0.15828 |  |  |
| M705T67 | 0.15825 |  |  |
| M1358T363 | 0.15807 |  |  |
| M1323T302 | 0.15802 |  |  |
| M961T339 | 0.15788 |  |  |
| M666T419_1 | 0.15783 |  |  |
| M909T282 | 0.15781 |  |  |
| M258T296 | 0.15759 |  |  |
| M864T327 | 0.15717 |  |  |
| M315T594 | 0.15703 |  |  |
| M242T120 | 0.15701 |  |  |
| M1425T391_3 | 0.15694 |  |  |
| M1320T375 | 0.1569 |  |  |
| M893T449_1 | 0.15684 |  |  |
| M874T437 | 0.15576 |  |  |
| M888T381 | 0.15543 |  |  |
| M667T67 | 0.15543 |  |  |
| M311T586 | 0.15516 |  |  |
| M565T61 | 0.15502 |  |  |
| M903T449 | 0.15493 |  |  |
| M644T363 | 0.15469 |  |  |
| M209T127 | 0.15468 |  |  |
| M1151T299 | 0.15467 |  |  |
| M846T332 | 0.15466 |  |  |
| M1014T453_1 | 0.1545 |  |  |
| M1046T453 | 0.15449 |  |  |
| M894T318 | 0.15444 |  |  |
| M653T396_3 | 0.15438 |  |  |
| M980T451_2 | 0.15412 |  |  |
| M921T376_2 | 0.15407 |  |  |
| M128T156 | 0.15403 |  |  |
| M954T498 | 0.15388 |  |  |
| M1164T392 | 0.15384 |  |  |
| M388T290 | 0.15364 |  |  |
| M1349T303 | 0.15345 |  |  |
| M649T67 | 0.15344 |  |  |
| M1476T316 | 0.15313 |  |  |
| M1042T317_2 | 0.15304 |  |  |
| M356T565 | 0.15287 |  |  |
| M850T283_1 | 0.15275 |  |  |
| M978T286 | 0.15274 |  |  |
| M958T451 | 0.15259 |  |  |
| M576T338 | 0.15253 |  |  |
| M525T361 | 0.1525 |  |  |
| M511T275_2 | 0.15246 |  |  |
| M1078T335_3 | 0.15229 |  |  |
| M633T279 | 0.1519 |  |  |
| M726T285 | 0.15183 |  |  |
| M742T368_2 | 0.15179 |  |  |
| M686T440 | 0.15167 |  |  |
| M1061T287_1 | 0.15161 |  |  |
| M720T357 | 0.15158 |  |  |
| M580T357 | 0.15145 |  |  |
| M912T387_2 | 0.15137 |  |  |
| M644T417_1 | 0.15119 |  |  |
| M882T449_1 | 0.15118 |  |  |
| M1425T391_1 | 0.15099 |  |  |
| M881T449 | 0.15078 |  |  |
| M1109T364 | 0.15077 |  |  |
| M1238T332 | 0.1506 |  |  |
| M776T338_1 | 0.15054 |  |  |
| M858T455 | 0.15012 |  |  |
| M745T275 | 0.15008 |  |  |
| M876T455 | 0.15007 |  |  |
| M1012T278 | 0.14997 |  |  |
| M1069T454_1 | 0.14996 |  |  |
| M503T405_1 | 0.14995 |  |  |
| M1155T282_2 | 0.14984 |  |  |
| M261T317 | 0.14976 |  |  |
| M918T400 | 0.14951 |  |  |
| M1118T379_1 | 0.14938 |  |  |
| M413T62 | 0.14923 |  |  |
| M1186T311_1 | 0.14908 |  |  |
| M708T284_1 | 0.14906 |  |  |
| M780T383 | 0.14906 |  |  |
| M1024T453_2 | 0.14848 |  |  |
| M1027T67 | 0.14845 |  |  |
| M1348T324_1 | 0.14842 |  |  |
| M111T167 | 0.14836 |  |  |
| M293T335 | 0.14819 |  |  |
| M217T285 | 0.14812 |  |  |
| M1205T368_2 | 0.14812 |  |  |
| M907T288 | 0.14803 |  |  |
| M276T503 | 0.14787 |  |  |
| M712T374 | 0.14773 |  |  |
| M1235T317_1 | 0.14756 |  |  |
| M1228T375 | 0.14756 |  |  |
| M1216T387_1 | 0.14722 |  |  |
| M872T280 | 0.1471 |  |  |
| M757T114 | 0.14697 |  |  |
| M460T583 | 0.14678 |  |  |
| M1350T324_1 | 0.14658 |  |  |
| M364T506 | 0.14647 |  |  |
| M683T284_2 | 0.14646 |  |  |
| M539T409 | 0.1463 |  |  |
| M1062T285_2 | 0.14616 |  |  |
| M1176T400 | 0.14587 |  |  |
| M1065T334_2 | 0.14573 |  |  |
| M600T67 | 0.14553 |  |  |
| M597T278 | 0.14542 |  |  |
| M929T382 | 0.1454 |  |  |
| M473T275 | 0.14536 |  |  |
| M911T284 | 0.14533 |  |  |
| M689T67 | 0.14528 |  |  |
| M1250T317_1 | 0.14506 |  |  |
| M833T281_1 | 0.1447 |  |  |
| M1084T380_2 | 0.14452 |  |  |
| M805T452 | 0.14447 |  |  |
| M371T362 | 0.1444 |  |  |
| M520T345 | 0.14419 |  |  |
| M433T328 | 0.144 |  |  |
| M534T408 | 0.14371 |  |  |
| M824T275 | 0.14366 |  |  |
| M360T292 | 0.14363 |  |  |
| M898T385_2 | 0.14348 |  |  |
| M147T47 | 0.14342 |  |  |
| M867T579 | 0.14333 |  |  |
| M209T105 | 0.14312 |  |  |
| M1138T400_2 | 0.14309 |  |  |
| M1172T311 | 0.14307 |  |  |
| M1026T67 | 0.14301 |  |  |
| M767T278 | 0.14272 |  |  |
| M811T114 | 0.14262 |  |  |
| M374T363 | 0.1426 |  |  |
| M721T357 | 0.14258 |  |  |
| M638T382 | 0.1425 |  |  |
| M1187T67 | 0.14235 |  |  |
| M874T397 | 0.14234 |  |  |
| M518T350 | 0.14227 |  |  |
| M795T316 | 0.14203 |  |  |
| M641T343 | 0.14194 |  |  |
| M1177T400_3 | 0.14182 |  |  |
| M1288T307_3 | 0.14164 |  |  |
| M927T281 | 0.14156 |  |  |
| M485T317 | 0.14136 |  |  |
| M1165T285 | 0.14117 |  |  |
| M1109T396 | 0.14113 |  |  |
| M1047T453_1 | 0.14113 |  |  |
| M635T342 | 0.14096 |  |  |
| M923T383_2 | 0.14096 |  |  |
| M307T589 | 0.14087 |  |  |
| M1148T380_1 | 0.14081 |  |  |
| M321T314 | 0.14078 |  |  |
| M885T455_1 | 0.14048 |  |  |
| M632T276 | 0.1402 |  |  |
| M469T292 | 0.14011 |  |  |
| M360T313 | 0.13996 |  |  |
| M757T281_2 | 0.13979 |  |  |
| M511T266 | 0.13971 |  |  |
| M1247T381_1 | 0.13964 |  |  |
| M552T277_1 | 0.13942 |  |  |
| M795T273 | 0.13915 |  |  |
| M693T283 | 0.13914 |  |  |
| M556T322 | 0.13914 |  |  |
| M691T274 | 0.13906 |  |  |
| M1445T335_1 | 0.139 |  |  |
| M1450T392_4 | 0.13886 |  |  |
| M700T284_3 | 0.13886 |  |  |
| M579T277 | 0.13886 |  |  |
| M1065T306_2 | 0.13885 |  |  |
| M460T579 | 0.13849 |  |  |
| M556T366 | 0.13838 |  |  |
| M773T281 | 0.13832 |  |  |
| M246T291 | 0.13801 |  |  |
| M743T386 | 0.1378 |  |  |
| M950T345 | 0.13741 |  |  |
| M1246T379 | 0.13737 |  |  |
| M1079T330 | 0.13733 |  |  |
| M1128T345 | 0.13733 |  |  |
| M56T67 | 0.13686 |  |  |
| M1057T453_2 | 0.13681 |  |  |
| M800T382 | 0.13673 |  |  |
| M1049T376 | 0.13657 |  |  |
| M937T450_2 | 0.13647 |  |  |
| M626T372_1 | 0.1363 |  |  |
| M1080T454_1 | 0.13623 |  |  |
| M1166T393 | 0.13618 |  |  |
| M757T278 | 0.13606 |  |  |
| M1165T436 | 0.136 |  |  |
| M988T280 | 0.13588 |  |  |
| M631T52 | 0.13587 |  |  |
| M946T281 | 0.13578 |  |  |
| M636T279 | 0.13563 |  |  |
| M626T66 | 0.13544 |  |  |
| M903T455 | 0.13531 |  |  |
| M701T382 | 0.1353 |  |  |
| M447T350 | 0.1351 |  |  |
| M426T273 | 0.13506 |  |  |
| M668T369 | 0.13479 |  |  |
| M982T287 | 0.13474 |  |  |
| M1091T455 | 0.13471 |  |  |
| M305T314 | 0.13441 |  |  |
| M202T61 | 0.13413 |  |  |
| M505T331 | 0.13382 |  |  |
| M723T66 | 0.13346 |  |  |
| M1230T312 | 0.13343 |  |  |
| M1154T384_3 | 0.13322 |  |  |
| M1477T317_1 | 0.13321 |  |  |
| M1129T360_1 | 0.13308 |  |  |
| M791T388 | 0.13302 |  |  |
| M1455T392_1 | 0.13298 |  |  |
| M969T451_2 | 0.13286 |  |  |
| M882T298 | 0.13283 |  |  |
| M772T280 | 0.13273 |  |  |
| M726T320 | 0.13273 |  |  |
| M868T335_1 | 0.13269 |  |  |
| M1491T306_1 | 0.13267 |  |  |
| M1166T292 | 0.13226 |  |  |
| M300T341 | 0.13208 |  |  |
| M300T313 | 0.13207 |  |  |
| M959T451 | 0.13179 |  |  |
| M1268T388 | 0.13167 |  |  |
| M661T375_2 | 0.13161 |  |  |
| M1374T311_1 | 0.13129 |  |  |
| M992T452_2 | 0.13111 |  |  |
| M886T382 | 0.13108 |  |  |
| M503T275_2 | 0.13089 |  |  |
| M372T310 | 0.13082 |  |  |
| M775T338 | 0.13074 |  |  |
| M1399T402_2 | 0.13069 |  |  |
| M244T298 | 0.13066 |  |  |
| M926T302 | 0.13054 |  |  |
| M1423T311_1 | 0.1305 |  |  |
| M601T311 | 0.13049 |  |  |
| M689T345_2 | 0.13048 |  |  |
| M928T388_1 | 0.13041 |  |  |
| M835T658 | 0.13036 |  |  |
| M703T114 | 0.13025 |  |  |
| M827T276 | 0.13024 |  |  |
| M482T275_1 | 0.13018 |  |  |
| M521T275_2 | 0.13004 |  |  |
| M1163T339_1 | 0.12992 |  |  |
| M1427T399 | 0.12982 |  |  |
| M906T345 | 0.12982 |  |  |
| M967T278 | 0.12976 |  |  |
| M1162T392_1 | 0.12966 |  |  |
| M515T349 | 0.12955 |  |  |
| M906T284_2 | 0.12947 |  |  |
| M981T451_2 | 0.12926 |  |  |
| M510T277 | 0.12916 |  |  |
| M820T668_1 | 0.12915 |  |  |
| M685T60 | 0.129 |  |  |
| M756T378 | 0.12875 |  |  |
| M524T275 | 0.12869 |  |  |
| M525T275_1 | 0.12865 |  |  |
| M1063T285_2 | 0.12858 |  |  |
| M750T279 | 0.12847 |  |  |
| M1113T290 | 0.12846 |  |  |
| M613T583 | 0.12842 |  |  |
| M872T281 | 0.12825 |  |  |
| M974T282 | 0.1282 |  |  |
| M578T412 | 0.12814 |  |  |
| M860T374 | 0.12813 |  |  |
| M605T219 | 0.12812 |  |  |
| M620T282 | 0.12811 |  |  |
| M860T448_1 | 0.12811 |  |  |
| M330T364 | 0.12804 |  |  |
| M600T414_1 | 0.12787 |  |  |
| M490T402 | 0.12762 |  |  |
| M1069T376 | 0.12749 |  |  |
| M633T322 | 0.12738 |  |  |
| M1399T286 | 0.12731 |  |  |
| M632T321 | 0.12714 |  |  |
| M157T274 | 0.127 |  |  |
| M1147T380 | 0.12699 |  |  |
| M1229T310 | 0.12678 |  |  |
| M187T299 | 0.12672 |  |  |
| M793T322 | 0.12658 |  |  |
| M1013T404_2 | 0.12656 |  |  |
| M459T345_1 | 0.12649 |  |  |
| M618T672 | 0.12633 |  |  |
| M1213T449_2 | 0.12627 |  |  |
| M1228T450_2 | 0.126 |  |  |
| M220T293 | 0.12593 |  |  |
| M205T286 | 0.12583 |  |  |
| M1062T285_3 | 0.12571 |  |  |
| M540T67 | 0.12567 |  |  |
| M700T283 | 0.12563 |  |  |
| M696T278 | 0.12559 |  |  |
| M1265T325_3 | 0.12532 |  |  |
| M556T410_1 | 0.12529 |  |  |
| M1013T403 | 0.12528 |  |  |
| M1162T340 | 0.12513 |  |  |
| M387T338 | 0.12507 |  |  |
| M935T279 | 0.12496 |  |  |
| M260T292 | 0.12445 |  |  |
| M851T67 | 0.12434 |  |  |
| M1085T335_4 | 0.12432 |  |  |
| M722T278 | 0.12429 |  |  |
| M708T284_2 | 0.12398 |  |  |
| M382T66 | 0.12391 |  |  |
| M707T278 | 0.1237 |  |  |
| M669T374_1 | 0.12362 |  |  |
| M402T342 | 0.12343 |  |  |
| M764T114 | 0.12343 |  |  |
| M189T295 | 0.12323 |  |  |
| M1036T454 | 0.12292 |  |  |
| M660T659 | 0.12279 |  |  |
| M962T280_1 | 0.12278 |  |  |
| M1329T324_2 | 0.12275 |  |  |
| M301T67 | 0.12272 |  |  |
| M1119T379 | 0.1227 |  |  |
| M613T373 | 0.12262 |  |  |
| M127T46 | 0.12262 |  |  |
| M1267T404 | 0.12258 |  |  |
| M787T390 | 0.12255 |  |  |
| M962T401 | 0.12233 |  |  |
| M704T659 | 0.12221 |  |  |
| M897T385_1 | 0.12215 |  |  |
| M719T385 | 0.12194 |  |  |
| M563T52 | 0.12188 |  |  |
| M230T505 | 0.12185 |  |  |
| M875T499 | 0.12172 |  |  |
| M132T294 | 0.1217 |  |  |
| M722T279_1 | 0.12168 |  |  |
| M625T276_3 | 0.12155 |  |  |
| M791T389_2 | 0.12142 |  |  |
| M739T280 | 0.12139 |  |  |
| M835T369 | 0.12137 |  |  |
| M209T391 | 0.12119 |  |  |
| M544T346 | 0.12118 |  |  |
| M907T359_2 | 0.12115 |  |  |
| M657T352 | 0.12107 |  |  |
| M722T349_2 | 0.12097 |  |  |
| M651T66 | 0.12093 |  |  |
| M201T111 | 0.12091 |  |  |
| M735T339_1 | 0.12087 |  |  |
| M1287T451_1 | 0.12073 |  |  |
| M886T279 | 0.12052 |  |  |
| M467T276_2 | 0.12042 |  |  |
| M437T579 | 0.12026 |  |  |
| M941T424 | 0.12018 |  |  |
| M992T289 | 0.11988 |  |  |
| M512T274_1 | 0.11984 |  |  |
| M1222T373_2 | 0.11983 |  |  |
| M360T383 | 0.11964 |  |  |
| M159T63 | 0.11943 |  |  |
| M941T312 | 0.11925 |  |  |
| M547T388 | 0.11922 |  |  |
| M736T369 | 0.11894 |  |  |
| M647T52 | 0.11891 |  |  |
| M221T66 | 0.11889 |  |  |
| M708T66 | 0.11876 |  |  |
| M951T388_4 | 0.11873 |  |  |
| M1095T286_1 | 0.11872 |  |  |
| M1172T359 | 0.11869 |  |  |
| M1164T285_2 | 0.11861 |  |  |
| M1446T335_3 | 0.11858 |  |  |
| M293T318 | 0.11835 |  |  |
| M369T60_1 | 0.11834 |  |  |
| M777T280_2 | 0.11811 |  |  |
| M920T376 | 0.11805 |  |  |
| M938T284 | 0.11788 |  |  |
| M476T351 | 0.11779 |  |  |
| M692T280 | 0.11763 |  |  |
| M732T423_2 | 0.11739 |  |  |
| M444T312 | 0.11735 |  |  |
| M497T274 | 0.11735 |  |  |
| M512T274_2 | 0.11733 |  |  |
| M1366T287_3 | 0.11708 |  |  |
| M547T52 | 0.11707 |  |  |
| M940T424 | 0.11696 |  |  |
| M1155T282_1 | 0.11687 |  |  |
| M742T368_1 | 0.11677 |  |  |
| M861T378 | 0.11675 |  |  |
| M864T320 | 0.11671 |  |  |
| M1005T404 | 0.11647 |  |  |
| M930T283_1 | 0.11632 |  |  |
| M358T337 | 0.1163 |  |  |
| M921T376_3 | 0.11623 |  |  |
| M438T318 | 0.1161 |  |  |
| M1036T453 | 0.11559 |  |  |
| M587T60 | 0.1152 |  |  |
| M1437T335_1 | 0.11518 |  |  |
| M775T353 | 0.11509 |  |  |
| M389T276_1 | 0.11506 |  |  |
| M1213T366_1 | 0.115 |  |  |
| M657T378 | 0.11492 |  |  |
| M489T60 | 0.1149 |  |  |
| M832T395 | 0.11474 |  |  |
| M797T283 | 0.11469 |  |  |
| M999T365 | 0.11466 |  |  |
| M983T289_1 | 0.11461 |  |  |
| M812T380 | 0.11454 |  |  |
| M319T585 | 0.11441 |  |  |
| M1177T311_1 | 0.1144 |  |  |
| M832T282 | 0.11437 |  |  |
| M329T68 | 0.11427 |  |  |
| M974T283 | 0.11427 |  |  |
| M1257T450_2 | 0.11424 |  |  |
| M1234T317_2 | 0.1142 |  |  |
| M1443T341_1 | 0.11415 |  |  |
| M698T285_2 | 0.11408 |  |  |
| M701T286 | 0.11391 |  |  |
| M811T279_2 | 0.11382 |  |  |
| M457T273_2 | 0.11377 |  |  |
| M366T380 | 0.11368 |  |  |
| M359T276 | 0.11358 |  |  |
| M1419T334_1 | 0.11332 |  |  |
| M687T278 | 0.1132 |  |  |
| M1036T359 | 0.11311 |  |  |
| M389T276_2 | 0.11299 |  |  |
| M1164T285 | 0.11274 |  |  |
| M1455T392_2 | 0.11272 |  |  |
| M953T282_1 | 0.11272 |  |  |
| M1491T300 | 0.1127 |  |  |
| M846T395_1 | 0.11265 |  |  |
| M1436T335_2 | 0.11255 |  |  |
| M987T287 | 0.11224 |  |  |
| M344T292 | 0.11222 |  |  |
| M1280T302 | 0.11198 |  |  |
| M823T386 | 0.11189 |  |  |
| M381T66.1 | 0.11183 |  |  |
| M1264T325 | 0.11175 |  |  |
| M801T289 | 0.1116 |  |  |
| M277T53 | 0.11141 |  |  |
| M389T67 | 0.11132 |  |  |
| M264T273_2 | 0.11114 |  |  |
| M1235T317_2 | 0.11113 |  |  |
| M754T293 | 0.11107 |  |  |
| M421T67 | 0.11094 |  |  |
| M1366T287_2 | 0.11084 |  |  |
| M787T280 | 0.11069 |  |  |
| M889T328 | 0.11033 |  |  |
| M215T59 | 0.11013 |  |  |
| M870T283_2 | 0.11001 |  |  |
| M396T309 | 0.10996 |  |  |
| M799T284_1 | 0.10994 |  |  |
| M288T294 | 0.10974 |  |  |
| M1058T454_2 | 0.10971 |  |  |
| M1064T331 | 0.10955 |  |  |
| M622T399 | 0.10945 |  |  |
| M639T348 | 0.10931 |  |  |
| M1163T299 | 0.10929 |  |  |
| M836T658 | 0.10911 |  |  |
| M1047T454 | 0.10907 |  |  |
| M846T395_2 | 0.10905 |  |  |
| M914T302 | 0.10891 |  |  |
| M631T307 | 0.10883 |  |  |
| M841T386 | 0.10859 |  |  |
| M383T247 | 0.10847 |  |  |
| M446T278 | 0.10835 |  |  |
| M584T276 | 0.10835 |  |  |
| M697T286 | 0.1081 |  |  |
| M968T279 | 0.10807 |  |  |
| M745T385 | 0.10801 |  |  |
| M1228T376 | 0.10765 |  |  |
| M185T47 | 0.10742 |  |  |
| M113T52 | 0.1074 |  |  |
| M628T276 | 0.1074 |  |  |
| M543T295 | 0.10739 |  |  |
| M473T60 | 0.10734 |  |  |
| M684T286_2 | 0.10718 |  |  |
| M1263T329 | 0.10717 |  |  |
| M1011T376_1 | 0.10715 |  |  |
| M828T276 | 0.10701 |  |  |
| M475T274 | 0.10683 |  |  |
| M355T273 | 0.10677 |  |  |
| M1482T386 | 0.10676 |  |  |
| M1329T324_1 | 0.10673 |  |  |
| M281T272 | 0.10663 |  |  |
| M555T279 | 0.10658 |  |  |
| M158T130 | 0.10654 |  |  |
| M992T290 | 0.10645 |  |  |
| M626T284_1 | 0.10635 |  |  |
| M287T67 | 0.10635 |  |  |
| M765T382 | 0.10624 |  |  |
| M1020T397 | 0.10608 |  |  |
| M81T61 | 0.10607 |  |  |
| M710T422_2 | 0.10604 |  |  |
| M818T392_2 | 0.10596 |  |  |
| M723T351_1 | 0.10582 |  |  |
| M800T285_2 | 0.10549 |  |  |
| M463T289 | 0.10542 |  |  |
| M534T390 | 0.10535 |  |  |
| M866T350 | 0.10516 |  |  |
| M487T67 | 0.10502 |  |  |
| M655T357 | 0.10494 |  |  |
| M1167T390 | 0.10476 |  |  |
| M714T280 | 0.10474 |  |  |
| M912T287 | 0.10465 |  |  |
| M133T72 | 0.10464 |  |  |
| M510T276 | 0.10451 |  |  |
| M948T451 | 0.10444 |  |  |
| M416T397 | 0.10428 |  |  |
| M979T286 | 0.10423 |  |  |
| M1063T324 | 0.10413 |  |  |
| M195T289 | 0.10406 |  |  |
| M1088T67 | 0.1038 |  |  |
| M759T283_2 | 0.10375 |  |  |
| M774T283 | 0.10355 |  |  |
| M500T277 | 0.10351 |  |  |
| M1419T334_2 | 0.1034 |  |  |
| M1271T405_1 | 0.10328 |  |  |
| M763T373 | 0.10328 |  |  |
| M1418T334_2 | 0.10322 |  |  |
| M1227T375_2 | 0.10314 |  |  |
| M490T359 | 0.10306 |  |  |
| M540T284 | 0.10305 |  |  |
| M980T396 | 0.10273 |  |  |
| M356T393 | 0.10258 |  |  |
| M981T286_2 | 0.10251 |  |  |
| M821T349 | 0.10249 |  |  |
| M1166T435 | 0.10245 |  |  |
| M432T363 | 0.1023 |  |  |
| M168T156 | 0.10222 |  |  |
| M1063T323_2 | 0.10211 |  |  |
| M666T276 | 0.10199 |  |  |
| M862T413_1 | 0.10194 |  |  |
| M1160T283_2 | 0.10176 |  |  |
| M949T282_3 | 0.10173 |  |  |
| M476T349 | 0.10173 |  |  |
| M528T273 | 0.10165 |  |  |
| M337T61 | 0.10162 |  |  |
| M1261T282_1 | 0.10151 |  |  |
| M436T276 | 0.10138 |  |  |
| M97T58 | 0.10135 |  |  |
| M390T275 | 0.10132 |  |  |
| M989T280 | 0.10126 |  |  |
| M590T276 | 0.10117 |  |  |
| M436T74 | 0.10115 |  |  |
| M973T283 | 0.10105 |  |  |
| M814T361 | 0.10102 |  |  |
| M975T284 | 0.10094 |  |  |
| M742T368_3 | 0.10091 |  |  |
| M792T659 | 0.10072 |  |  |
| M1093T285_1 | 0.10058 |  |  |
| M683T278_2 | 0.10022 |  |  |
| M394T334 | 0.10003 |  |  |
| M909T277 | 0.10001 |  |  |
| M679T384 | 0.099997 |  |  |
| M751T284_2 | 0.09993 |  |  |
| M376T276 | 0.09992 |  |  |
| M372T383_1 | 0.099915 |  |  |
| M1249T67 | 0.099587 |  |  |
| M942T400_2 | 0.099392 |  |  |
| M631T279_1 | 0.099346 |  |  |
| M725T392_3 | 0.099272 |  |  |
| M841T277 | 0.099216 |  |  |
| M346T276 | 0.099214 |  |  |
| M1077T335 | 0.099201 |  |  |
| M1044T375 | 0.099141 |  |  |
| M1113T368_1 | 0.099135 |  |  |
| M1138T403 | 0.099061 |  |  |
| M732T275 | 0.099023 |  |  |
| M482T659 | 0.098675 |  |  |
| M843T280 | 0.098578 |  |  |
| M634T324 | 0.098279 |  |  |
| M1265T325_4 | 0.098237 |  |  |
| M1034T364 | 0.098215 |  |  |
| M913T412_3 | 0.098195 |  |  |
| M844T350 | 0.098195 |  |  |
| M671T278_1 | 0.098125 |  |  |
| M1435T341_1 | 0.098048 |  |  |
| M1281T398 | 0.098033 |  |  |
| M826T278 | 0.097991 |  |  |
| M749T279_1 | 0.097956 |  |  |
| M346T273 | 0.097921 |  |  |
| M625T276_2 | 0.097634 |  |  |
| M1437T335_2 | 0.097595 |  |  |
| M357T272 | 0.097338 |  |  |
| M508T424 | 0.096973 |  |  |
| M1115T400_2 | 0.096939 |  |  |
| M509T294 | 0.096717 |  |  |
| M209T310 | 0.096493 |  |  |
| M475T393 | 0.096433 |  |  |
| M852T282_1 | 0.096429 |  |  |
| M269T546 | 0.09623 |  |  |
| M868T335_2 | 0.096207 |  |  |
| M1251T284_2 | 0.096111 |  |  |
| M1128T344_2 | 0.095781 |  |  |
| M654T345_2 | 0.095676 |  |  |
| M372T383_2 | 0.095644 |  |  |
| M727T278 | 0.095612 |  |  |
| M1027T354 | 0.095594 |  |  |
| M910T277 | 0.095478 |  |  |
| M714T403 | 0.095247 |  |  |
| M769T384_2 | 0.095149 |  |  |
| M678T386 | 0.095122 |  |  |
| M357T366 | 0.095067 |  |  |
| M1453T392_1 | 0.094934 |  |  |
| M1171T298 | 0.094914 |  |  |
| M1231T316 | 0.094911 |  |  |
| M493T306 | 0.094909 |  |  |
| M672T374_2 | 0.094891 |  |  |
| M1340T289 | 0.094749 |  |  |
| M867T67 | 0.094615 |  |  |
| M894T317_1 | 0.094525 |  |  |
| M997T276 | 0.094483 |  |  |
| M383T65 | 0.094085 |  |  |
| M103T288 | 0.093902 |  |  |
| M979T287 | 0.093885 |  |  |
| M930T283_2 | 0.093872 |  |  |
| M882T390_1 | 0.093858 |  |  |
| M174T131 | 0.093848 |  |  |
| M299T287 | 0.093783 |  |  |
| M133T523 | 0.093758 |  |  |
| M559T342 | 0.093721 |  |  |
| M953T281_2 | 0.093604 |  |  |
| M411T277 | 0.093403 |  |  |
| M1010T375 | 0.093246 |  |  |
| M1087T391_2 | 0.093006 |  |  |
| M882T391 | 0.092998 |  |  |
| M923T383_1 | 0.092916 |  |  |
| M704T67 | 0.092822 |  |  |
| M873T373 | 0.092518 |  |  |
| M1476T315 | 0.092475 |  |  |
| M464T273 | 0.092384 |  |  |
| M1398T287 | 0.092219 |  |  |
| M751T284_1 | 0.092057 |  |  |
| M472T402 | 0.091709 |  |  |
| M1148T380_2 | 0.091692 |  |  |
| M1273T387_1 | 0.091598 |  |  |
| M1005T276 | 0.091301 |  |  |
| M1122T285 | 0.091228 |  |  |
| M455T339 | 0.091096 |  |  |
| M254T274 | 0.090973 |  |  |
| M546T276_2 | 0.090919 |  |  |
| M582T324 | 0.090902 |  |  |
| M412T274 | 0.09086 |  |  |
| M1342T331_3 | 0.090711 |  |  |
| M356T325 | 0.09059 |  |  |
| M500T275_1 | 0.090548 |  |  |
| M778T280_2 | 0.090538 |  |  |
| M723T279 | 0.090404 |  |  |
| M1270T404_2 | 0.090355 |  |  |
| M383T327_2 | 0.090064 |  |  |
| M1071T284 | 0.090041 |  |  |
| M482T72 | 0.090021 |  |  |
| M967T671_1 | 0.089868 |  |  |
| M843T350_2 | 0.089838 |  |  |
| M1342T331_4 | 0.089774 |  |  |
| M528T381 | 0.08972 |  |  |
| M545T280 | 0.08972 |  |  |
| M56T293 | 0.089275 |  |  |
| M489T277_1 | 0.089213 |  |  |
| M1064T323 | 0.089052 |  |  |
| M1260T283 | 0.088931 |  |  |
| M626T283 | 0.088814 |  |  |
| M866T67 | 0.08879 |  |  |
| M431T59 | 0.088783 |  |  |
| M502T293 | 0.088672 |  |  |
| M1021T283 | 0.088622 |  |  |
| M689T379_2 | 0.088558 |  |  |
| M457T368 | 0.088341 |  |  |
| M1226T287_2 | 0.088138 |  |  |
| M245T66 | 0.088119 |  |  |
| M284T314 | 0.088074 |  |  |
| M987T376_2 | 0.088067 |  |  |
| M966T671 | 0.088043 |  |  |
| M1080T325_2 | 0.08804 |  |  |
| M962T339 | 0.08799 |  |  |
| M534T388_1 | 0.087971 |  |  |
| M1023T281 | 0.087873 |  |  |
| M1089T335_1 | 0.087865 |  |  |
| M1435T398 | 0.087853 |  |  |
| M1127T344 | 0.087731 |  |  |
| M1088T335 | 0.087693 |  |  |
| M402T276_2 | 0.087648 |  |  |
| M696T281_1 | 0.087606 |  |  |
| M1071T279 | 0.087572 |  |  |
| M343T527 | 0.087557 |  |  |
| M458T303 | 0.087492 |  |  |
| M1374T311_2 | 0.087483 |  |  |
| M1418T343_2 | 0.087437 |  |  |
| M574T315 | 0.087305 |  |  |
| M534T366 | 0.087177 |  |  |
| M659T284 | 0.087051 |  |  |
| M1434T341_2 | 0.087029 |  |  |
| M792T280 | 0.08702 |  |  |
| M749T279_2 | 0.087017 |  |  |
| M945T343 | 0.086959 |  |  |
| M985T285 | 0.086596 |  |  |
| M463T306 | 0.0865 |  |  |
| M1001T285 | 0.086492 |  |  |
| M446T351 | 0.085739 |  |  |
| M1037T286_1 | 0.085611 |  |  |
| M845T386 | 0.085579 |  |  |
| M1003T276 | 0.085566 |  |  |
| M763T371 | 0.085449 |  |  |
| M1261T282_2 | 0.085426 |  |  |
| M760T302 | 0.085313 |  |  |
| M727T277 | 0.085235 |  |  |
| M1194T288_1 | 0.08508 |  |  |
| M492T375 | 0.084923 |  |  |
| M1360T335 | 0.084744 |  |  |
| M789T282 | 0.084682 |  |  |
| M1111T333 | 0.084669 |  |  |
| M591T277 | 0.084605 |  |  |
| M824T388_1 | 0.084581 |  |  |
| M366T66 | 0.084556 |  |  |
| M1177T400_4 | 0.084413 |  |  |
| M435T344 | 0.084336 |  |  |
| M476T285 | 0.084293 |  |  |
| M1444T341_3 | 0.084239 |  |  |
| M658T378_1 | 0.084165 |  |  |
| M645T326 | 0.084066 |  |  |
| M737T275 | 0.083952 |  |  |
| M567T276 | 0.083946 |  |  |
| M876T281_2 | 0.083825 |  |  |
| M1483T386 | 0.083759 |  |  |
| M107T395 | 0.083673 |  |  |
| M543T67_2 | 0.083261 |  |  |
| M610T372 | 0.083192 |  |  |
| M560T296 | 0.083128 |  |  |
| M1139T400 | 0.083092 |  |  |
| M983T288 | 0.082754 |  |  |
| M753T356_2 | 0.082667 |  |  |
| M1222T373_1 | 0.082631 |  |  |
| M687T284 | 0.082608 |  |  |
| M1020T286_2 | 0.082443 |  |  |
| M1157T384_2 | 0.081925 |  |  |
| M869T280 | 0.081856 |  |  |
| M784T67 | 0.081781 |  |  |
| M547T410_2 | 0.081622 |  |  |
| M982T288 | 0.081594 |  |  |
| M796T274 | 0.081551 |  |  |
| M798T274 | 0.081502 |  |  |
| M242T68 | 0.081419 |  |  |
| M295T499 | 0.081377 |  |  |
| M591T414_2 | 0.081314 |  |  |
| M187T62 | 0.081119 |  |  |
| M941T425 | 0.081057 |  |  |
| M729T279 | 0.080827 |  |  |
| M1270T405 | 0.080748 |  |  |
| M726T286 | 0.080744 |  |  |
| M519T398 | 0.08064 |  |  |
| M1250T372_2 | 0.080575 |  |  |
| M967T392_2 | 0.080521 |  |  |
| M1166T391 | 0.080507 |  |  |
| M1065T334_3 | 0.080264 |  |  |
| M1043T317_1 | 0.080188 |  |  |
| M460T277 | 0.079851 |  |  |
| M1074T331 | 0.079731 |  |  |
| M486T344 | 0.079416 |  |  |
| M343T283 | 0.0794 |  |  |
| M1435T341_2 | 0.079155 |  |  |
| M1167T392 | 0.079122 |  |  |
| M1165T285.1 | 0.079036 |  |  |
| M1089T280_2 | 0.079035 |  |  |
| M699T289 | 0.078964 |  |  |
| M377T343 | 0.07885 |  |  |
| M810T280 | 0.07877 |  |  |
| M1249T372 | 0.078706 |  |  |
| M518T358 | 0.078642 |  |  |
| M1106T293 | 0.078199 |  |  |
| M937T280 | 0.078167 |  |  |
| M897T291 | 0.078089 |  |  |
| M1058T335 | 0.077867 |  |  |
| M633T321 | 0.077854 |  |  |
| M930T375 | 0.077737 |  |  |
| M677T276 | 0.077483 |  |  |
| M782T277 | 0.077257 |  |  |
| M1451T392 | 0.077207 |  |  |
| M683T51 | 0.07712 |  |  |
| M691T277 | 0.077084 |  |  |
| M1278T347 | 0.077048 |  |  |
| M1107T281_1 | 0.076991 |  |  |
| M183T156 | 0.076899 |  |  |
| M646T279 | 0.076825 |  |  |
| M1166T275 | 0.076823 |  |  |
| M672T280 | 0.076686 |  |  |
| M658T378_2 | 0.076637 |  |  |
| M817T286 | 0.076632 |  |  |
| M760T389 | 0.076347 |  |  |
| M348T498 | 0.076317 |  |  |
| M434T274 | 0.076179 |  |  |
| M669T278 | 0.076069 |  |  |
| M826T436 | 0.076029 |  |  |
| M1305T350 | 0.076028 |  |  |
| M687T280 | 0.075934 |  |  |
| M167T288 | 0.075923 |  |  |
| M1102T370 | 0.075871 |  |  |
| M798T282 | 0.075776 |  |  |
| M494T275 | 0.075771 |  |  |
| M578T373 | 0.075716 |  |  |
| M1067T389_2 | 0.075656 |  |  |
| M446T69 | 0.075565 |  |  |
| M494T405 | 0.075472 |  |  |
| M781T383 | 0.07544 |  |  |
| M798T279 | 0.075402 |  |  |
| M267T272 | 0.075337 |  |  |
| M929T283 | 0.075325 |  |  |
| M551T277 | 0.075256 |  |  |
| M1011T376_2 | 0.075226 |  |  |
| M910T278 | 0.075041 |  |  |
| M947T337_2 | 0.074997 |  |  |
| M1069T359 | 0.074959 |  |  |
| M542T376 | 0.074916 |  |  |
| M682T280_2 | 0.074874 |  |  |
| M731T284_1 | 0.074856 |  |  |
| M1350T323 | 0.074682 |  |  |
| M475T275_2 | 0.074654 |  |  |
| M789T285 | 0.07463 |  |  |
| M470T276 | 0.074568 |  |  |
| M585T274 | 0.074533 |  |  |
| M330T285 | 0.074402 |  |  |
| M1117T288 | 0.074313 |  |  |
| M1176T390 | 0.07424 |  |  |
| M538T410 | 0.074063 |  |  |
| M285T593 | 0.073987 |  |  |
| M551T288 | 0.073944 |  |  |
| M529T383 | 0.07322 |  |  |
| M599T280 | 0.073104 |  |  |
| M536T354 | 0.07289 |  |  |
| M1343T331_1 | 0.072681 |  |  |
| M1170T298 | 0.072566 |  |  |
| M809T290 | 0.072283 |  |  |
| M622T378 | 0.072257 |  |  |
| M766T276 | 0.072253 |  |  |
| M926T385_2 | 0.072013 |  |  |
| M557T327 | 0.071995 |  |  |
| M1321T375 | 0.071844 |  |  |
| M567T287 | 0.071749 |  |  |
| M861T328 | 0.071313 |  |  |
| M563T402 | 0.07095 |  |  |
| M947T336 | 0.070927 |  |  |
| M533T275 | 0.0709 |  |  |
| M780T323 | 0.07077 |  |  |
| M920T367 | 0.070734 |  |  |
| M622T67 | 0.070551 |  |  |
| M936T276 | 0.070507 |  |  |
| M204T64 | 0.070321 |  |  |
| M833T281_2 | 0.070198 |  |  |
| M433T277 | 0.070038 |  |  |
| M980T397 | 0.069688 |  |  |
| M93T56 | 0.069528 |  |  |
| M404T274 | 0.069389 |  |  |
| M131T288 | 0.069322 |  |  |
| M332T273 | 0.069134 |  |  |
| M635T417_1 | 0.068915 |  |  |
| M868T343 | 0.068879 |  |  |
| M313T538 | 0.068627 |  |  |
| M569T276 | 0.068483 |  |  |
| M662T279 | 0.068467 |  |  |
| M641T342 | 0.068377 |  |  |
| M374T288 | 0.068182 |  |  |
| M525T382 | 0.068155 |  |  |
| M622T285 | 0.068137 |  |  |
| M1455T392_3 | 0.068073 |  |  |
| M765T67 | 0.067926 |  |  |
| M299T272 | 0.067694 |  |  |
| M504T274_1 | 0.067691 |  |  |
| M688T323 | 0.067321 |  |  |
| M1492T303_2 | 0.067224 |  |  |
| M187T382 | 0.067031 |  |  |
| M1223T373 | 0.066839 |  |  |
| M826T277 | 0.066732 |  |  |
| M1079T335 | 0.066729 |  |  |
| M1166T291_1 | 0.06634 |  |  |
| M990T364 | 0.066248 |  |  |
| M1069T292 | 0.066058 |  |  |
| M630T276 | 0.065899 |  |  |
| M503T405_2 | 0.065866 |  |  |
| M696T277 | 0.065768 |  |  |
| M1005T376 | 0.065688 |  |  |
| M745T278 | 0.065457 |  |  |
| M1265T404 | 0.065315 |  |  |
| M1361T283 | 0.065222 |  |  |
| M329T329 | 0.06519 |  |  |
| M484T276 | 0.065164 |  |  |
| M892T279 | 0.065013 |  |  |
| M786T278 | 0.064728 |  |  |
| M482T354 | 0.064596 |  |  |
| M560T412 | 0.064232 |  |  |
| M1363T335_1 | 0.064219 |  |  |
| M943T349 | 0.064197 |  |  |
| M1252T284_1 | 0.06403 |  |  |
| M1362T282 | 0.063978 |  |  |
| M1486T349 | 0.063939 |  |  |
| M951T344 | 0.063877 |  |  |
| M1035T364 | 0.06385 |  |  |
| M1342T331_2 | 0.063473 |  |  |
| M909T281 | 0.063447 |  |  |
| M1123T343 | 0.063425 |  |  |
| M762T387 | 0.063398 |  |  |
| M617T362 | 0.063187 |  |  |
| M521T66 | 0.063048 |  |  |
| M362T280 | 0.062968 |  |  |
| M952T282 | 0.062907 |  |  |
| M736T333 | 0.062699 |  |  |
| M219T59 | 0.062608 |  |  |
| M385T273 | 0.062574 |  |  |
| M390T276 | 0.062565 |  |  |
| M1437T335_3 | 0.062311 |  |  |
| M654T277_1 | 0.06202 |  |  |
| M606T281 | 0.06189 |  |  |
| M753T356_1 | 0.061637 |  |  |
| M1037T359 | 0.061508 |  |  |
| M1265T331 | 0.061419 |  |  |
| M600T414_2 | 0.061271 |  |  |
| M1304T380_1 | 0.060999 |  |  |
| M1271T375_2 | 0.060468 |  |  |
| M537T276 | 0.060417 |  |  |
| M1086T335 | 0.060413 |  |  |
| M555T330 | 0.060089 |  |  |
| M391T67 | 0.060003 |  |  |
| M1089T335_2 | 0.059919 |  |  |
| M1353T324_3 | 0.059907 |  |  |
| M342T273 | 0.059904 |  |  |
| M480T280 | 0.059794 |  |  |
| M529T327 | 0.059762 |  |  |
| M765T114 | 0.05941 |  |  |
| M1130T361 | 0.059168 |  |  |
| M425T382 | 0.059159 |  |  |
| M701T287_1 | 0.059149 |  |  |
| M531T273 | 0.058886 |  |  |
| M201T71 | 0.058852 |  |  |
| M492T273_3 | 0.058636 |  |  |
| M786T389 | 0.058568 |  |  |
| M482T339 | 0.058549 |  |  |
| M646T280_1 | 0.058214 |  |  |
| M1160T329 | 0.058186 |  |  |
| M273T67 | 0.058146 |  |  |
| M1341T289 | 0.058048 |  |  |
| M758T365 | 0.057686 |  |  |
| M556T410_2 | 0.057058 |  |  |
| M764T278 | 0.057021 |  |  |
| M654T396_1 | 0.056759 |  |  |
| M723T280 | 0.056593 |  |  |
| M228T541 | 0.056567 |  |  |
| M282T290 | 0.056219 |  |  |
| M565T96 | 0.056081 |  |  |
| M942T400_1 | 0.055957 |  |  |
| M1270T376 | 0.055776 |  |  |
| M681T379 | 0.055762 |  |  |
| M557T324 | 0.055545 |  |  |
| M660T329 | 0.055522 |  |  |
| M1320T379 | 0.055521 |  |  |
| M1251T372 | 0.055462 |  |  |
| M921T279 | 0.055432 |  |  |
| M410T321 | 0.055351 |  |  |
| M1248T375 | 0.054495 |  |  |
| M478T273 | 0.054393 |  |  |
| M810T290 | 0.054293 |  |  |
| M930T381 | 0.054186 |  |  |
| M559T66 | 0.053867 |  |  |
| M311T526 | 0.053471 |  |  |
| M270T68 | 0.053029 |  |  |
| M1487T349 | 0.052809 |  |  |
| M1447T335_1 | 0.052774 |  |  |
| M721T355 | 0.052201 |  |  |
| M887T382 | 0.051997 |  |  |
| M827T277 | 0.051819 |  |  |
| M1261T330 | 0.051794 |  |  |
| M1272T388 | 0.051784 |  |  |
| M726T283 | 0.051664 |  |  |
| M327T334 | 0.051538 |  |  |
| M657T419_1 | 0.051396 |  |  |
| M818T389 | 0.051267 |  |  |
| M1309T372_1 | 0.050394 |  |  |
| M556T280 | 0.050291 |  |  |
| M951T345 | 0.050072 |  |  |
| M738T275 | 0.049604 |  |  |
| M1073T275 | 0.04917 |  |  |
| M1037T360 | 0.049107 |  |  |
| M922T383_2 | 0.048562 |  |  |
| M788T277 | 0.04846 |  |  |
| M1343T331_2 | 0.04843 |  |  |
| M1260T331 | 0.048077 |  |  |
| M921T278 | 0.048005 |  |  |
| M1223T285 | 0.047747 |  |  |
| M188T58 | 0.047513 |  |  |
| M708T280 | 0.047308 |  |  |
| M1436T335_1 | 0.047187 |  |  |
| M1070T359 | 0.046981 |  |  |
| M955T387 | 0.04664 |  |  |
| M1008T373_2 | 0.04648 |  |  |
| M786T283 | 0.04587 |  |  |
| M265T55 | 0.045635 |  |  |
| M738T278_2 | 0.045613 |  |  |
| M1048T379 | 0.044472 |  |  |
| M954T288 | 0.043912 |  |  |
| M112T309 | 0.043846 |  |  |
| M828T277 | 0.043685 |  |  |
| M355T344 | 0.043496 |  |  |
| M95T56 | 0.043494 |  |  |
| M271T582 | 0.043321 |  |  |
| M670T345 | 0.042851 |  |  |
| M514T274 | 0.042627 |  |  |
| M989T363 | 0.042234 |  |  |
| M796T279 | 0.041693 |  |  |
| M1317T329 | 0.041375 |  |  |
| M754T355 | 0.04131 |  |  |
| M957T280 | 0.04085 |  |  |
| M723T351_2 | 0.039968 |  |  |
| M1089T336 | 0.038386 |  |  |
| M724T276 | 0.035898 |  |  |
| M557T350 | 0.035677 |  |  |
| M738T386 | 0.032968 |  |  |
| M694T278 | 0.032744 |  |  |
| M1071T353 | 0.024385 |  |  |

VIP, Variable Importance in Projection. GC, gastric cancer.

| **Table S6: the collinearity for saliva metabolites between GC and postoperative group** | |
| --- | --- |
| Metabolite | VIF |
| M846T579 | 5.605 |
| M1202T372 | 5.892 |
| M432T579 | 4.991 |
| M415T565 | 2.51 |
| M89T112 | 1.628 |
| M1242T436 | 4.707 |

VIF, Variance Inflation Factor. GC, gastric cancer
